# Supplementary material for: KIF11 As a Potential Pan‐Cancer Immunological Biomarker Encompassing the Disease Staging, Prognoses, Tumor Microenvironment, and Therapeutic Responses
Source: Hindawi journal article supplement (doi:10.1155/2022/2764940), 2022-01-01

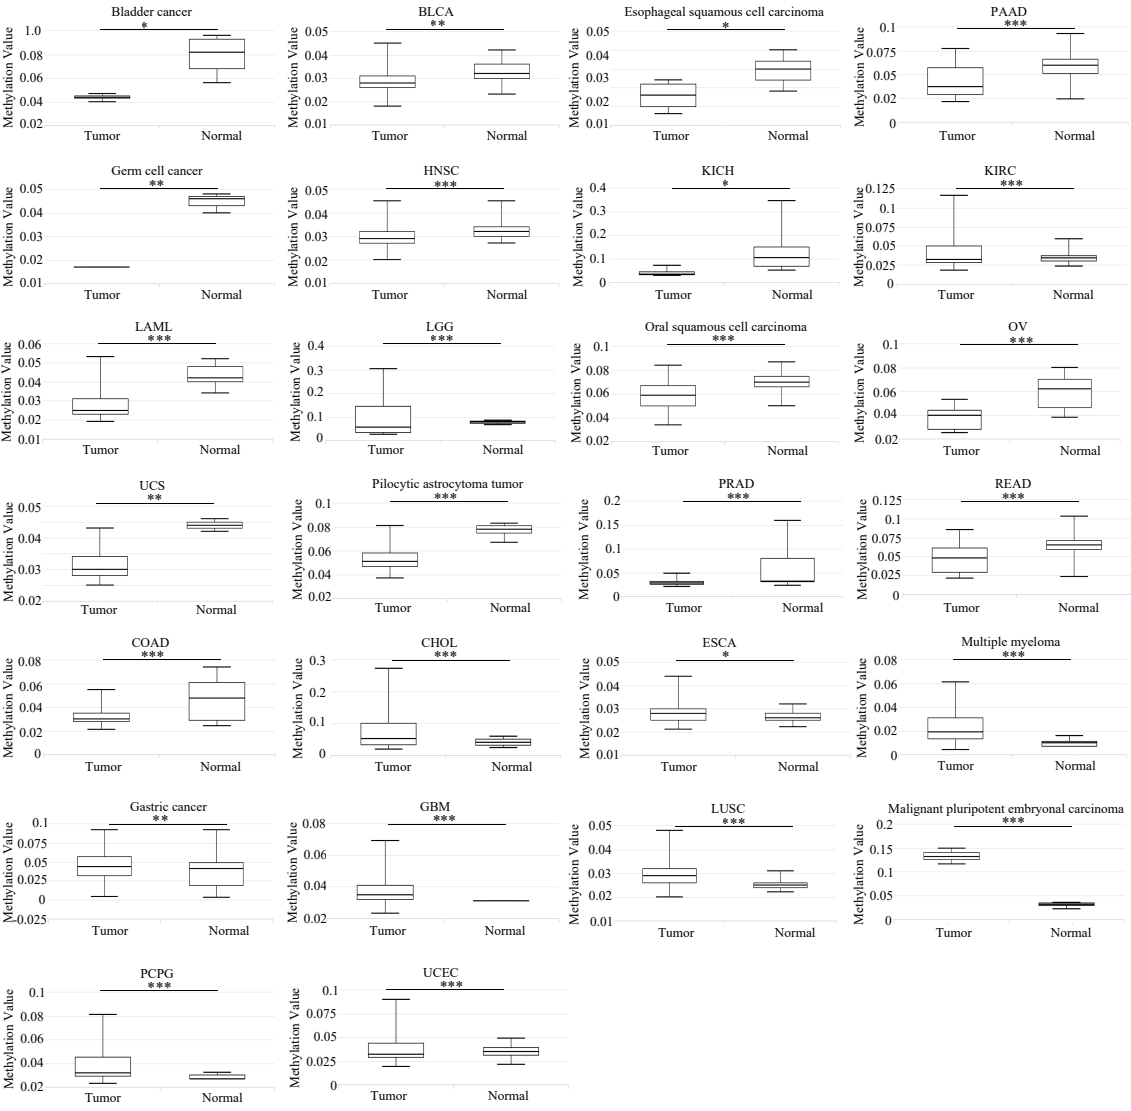

Supplement: f4 [file 2764940.f4.pdf]
