# Supplementary material for: KIF11 As a Potential Pan-Cancer Immunological Biomarker Encompassing the Disease Staging, Prognoses, Tumor Microenvironment, and Therapeutic Responses
Source: Oxid Med Cell Longev. 2022 Dec 16;2022:2764940. doi: 10.1155/2022/2764940 (PMC9893523; doi:10.1155/2022/2764940)
Supplement: Supplementary 7 — Supplementary Table 2: cancer tissue material and clinicopathological data. [file 2764940.f7.txt]

Cancer Tissue material and clinico-pathological data
Tissue	Breast		Cervix		Colon		Kidney		Lymph node		Liver		Lung		Ovary		Prostate		Pancreas		Stomach		Skin		Testis		Thyroid gland
	Normal	Tumor	Normal	Tumor	Normal	Tumor	Normal	Tumor	Normal	Tumor	Normal	Tumor	Normal	Tumor	Normal	Tumor	Normal	Tumor	Normal	Tumor	Normal	Tumor	Normal	Tumor	Normal	Tumor	Normal	Tumor
Donor gender	Female	Female	Female	Female	Female	Female	Male	Male	Female	Female	Female	Female	Male	Male	Female	Female	Male	Male	Male	Male	Male	Male	Female	Female	Male	Male	Female	Female
Donor age	23	27	65	63	80	84	59	61	53	57	63	58	59	57	35	37	51	55	66	63	72	77	41	46	68	71	44	30
Diagnosis	Normal tissue	Duct carcinoma	Normal tissue	Squamous cell carcinoma	Normal tissue	Adenocarcinoma	Normal tissue	Adenocarcinoma	Normal tissue	Hodgkin's disease	Normal tissue	Carcinoma, Hepatocellular	Normal tissue	Squamous cell carcinoma	Normal tissue	Cystadenocarcinoma, mucinous	Normal tissue	Adenocarcinoma, High grade	Normal tissue	Adenocarcinoma	Normal tissue	Adenocarcinoma	Normal tissue	Malignant melanoma	Normal tissue	Seminoma	Normal tissue	Papillary adenocarcinoma
