# Supplementary material for: KIF11 As a Potential Pan-Cancer Immunological Biomarker Encompassing the Disease Staging, Prognoses, Tumor Microenvironment, and Therapeutic Responses
Source: Oxid Med Cell Longev. 2022 Dec 16;2022:2764940. doi: 10.1155/2022/2764940 (PMC9893523; doi:10.1155/2022/2764940)
Supplement: Supplementary 8 — Supplementary Table 3: the association between KIF11 expression and survival of patients with different cancer types analyzed by the PrognoScan database. [file 2764940.f8.txt]

DATASET	CANCER TYPE	SUBTYPE	ENDPOINT	COHORT	CONTRIBUTOR	ARRAY TYPE	PROBE ID	N	CUTPOINT	MINIMUM P-VALUE	CORRECTED P-VALUE	ln(HR-high / HR-low)	COX P-VALUE	ln(HR)	HR [95% CI-low CI-upp]
GSE5287	Bladder cancer		Overall Survival	Aarhus (1995-2004)	Als	HG-U133A	204444_at	30	0.8	0.00828813	0.140043	1.3142	0.0778995	0.413394	1.51 [0.95 - 2.39]
GSE13507	Bladder cancer		Overall Survival	CNUH	Kim	Human-6 v2	ILMN_1794539	165	0.769697	0.0066241	0.117882	0.701153	0.0105061	0.321176	1.38 [1.08 - 1.76]
GSE13507	Bladder cancer	Transitional cell carcinoma	Disease Specific Survival	CNUH	Kim	Human-6 v2	ILMN_1794539	165	0.49697	0.000597765	0.0165002	1.31104	0.00086609	0.603562	1.83 [1.28 - 2.61]
GSE12417-GPL96	Blood cancer	AML	Overall Survival	AMLCG (1999-2003)	Metzeler	HG-U133A	204444_at	163	0.196319	0.0764041	-	-0.411573	0.420944	-0.0840702	0.92 [0.75 - 1.13]
GSE12417-GPL570	Blood cancer	AML	Overall Survival	AMLCG (2004)	Metzeler	HG-U133_Plus_2	204444_at	79	0.139241	0.0932261	-	0.851472	0.641649	0.0695906	1.07 [0.80 - 1.44]
GSE5122	Blood cancer	AML	Overall Survival	San Diego	Raponi	HG-U133A	204444_at	58	0.12069	0.230729	-	0.489813	0.761492	0.0579486	1.06 [0.73 - 1.54]
GSE8970	Blood cancer	AML	Overall Survival	San Diego	Raponi	HG-U133A	204444_at	34	0.235294	0.0560995	-	-0.794672	0.643498	-0.164221	0.85 [0.42 - 1.70]
GSE4475	Blood cancer	B-cell lymphoma	Overall Survival	Berlin (2003-2005)	Hummel	HG-U133A	204444_at	158	0.658228	0.013295	0.199585	-0.661412	0.0199862	-0.421438	0.66 [0.46 - 0.94]
E-TABM-346	Blood cancer	DLBCL	Overall Survival	GELA (1998-2000)	Jais	HG-U133A	204444_at	53	0.150943	0.0319539	0.369484	-0.955265	0.298128	-0.374024	0.69 [0.34 - 1.39]
E-TABM-346	Blood cancer	DLBCL	Event Free Survival	GELA (1998-2000)	Jais	HG-U133A	204444_at	53	0.150943	0.09896	-	-0.732147	0.566749	-0.197186	0.82 [0.42 - 1.61]
GSE16131-GPL96	Blood cancer	Follicular lymphoma	Overall Survival	NCI (1974-2001)	Dave	HG-U133A	204444_at	180	0.105556	0.00495071	0.0939079	-0.826687	0.616851	-0.0853666	0.92 [0.66 - 1.28]
GSE2658	Blood cancer	Multiple myeloma	Disease Specific Survival	Arkansas	Zhan	HG-U133_Plus_2	204444_at	559	0.840787	1.50E-08	1.08E-06	1.17724	0.000327392	0.512447	1.67 [1.26 - 2.21]
GSE4271-GPL96	Brain cancer	Astrocytoma	Overall Survival	MDA	Phillips	HG-U133A	204444_at	77	0.896104	0.00287378	0.0608419	1.1185	0.0110067	0.474497	1.61 [1.11 - 2.32]
GSE7696	Brain cancer	Glioblastoma	Overall Survival	Lausanne	Murat	HG-U133_Plus_2	204444_at	70	0.228571	0.211986	-	-0.375757	0.533647	-0.0740657	0.93 [0.74 - 1.17]
MGH-glioma	Brain cancer	Glioma	Overall Survival	CBTTB, MGH, BWH, CH	Nutt	HG-U95A	40726_at	50	0.86	0.0714014	-	0.885675	0.0852605	0.271059	1.31 [0.96 - 1.79]
GSE4412-GPL96	Brain cancer	Glioma	Overall Survival	UCLA (1996-2003)	Freije	HG-U133A	204444_at	74	0.837838	0.00267234	0.0573668	1.00822	0.163885	0.265827	1.30 [0.90 - 1.90]
GSE16581	Brain cancer	Meningioma	Overall Survival	UCLA	Lee	HG-U133_Plus_2	204444_at	67	0.119403	0.0536497	-	-1.27772	0.892228	-0.102313	0.90 [0.21 - 3.97]
GSE19615	Breast cancer		Distant Metastasis Free Survival	DF/HCC	Li	HG-U133_Plus_2	204444_at	115	0.130435	0.133281	-	15.2391	0.229031	0.450538	1.57 [0.75 - 3.27]
GSE3143	Breast cancer		Overall Survival	Duke	Bild	HG-U95A	40726_at	158	0.721519	0.00672367	0.11925	0.777462	0.101672	0.428053	1.53 [0.92 - 2.56]
GSE7849	Breast cancer		Disease Free Survival	Duke (1990-2001)	Anders	HG-U95A	40726_at	76	0.828947	0.217977	-	0.708615	0.884108	0.0576753	1.06 [0.49 - 2.30]
GSE12276	Breast cancer		Relapse Free Survival	EMC	Bos	HG-U133_Plus_2	204444_at	204	0.254902	0.0104954	0.167434	0.404841	0.0429805	0.264338	1.30 [1.01 - 1.68]
GSE6532-GPL570	Breast cancer		Distant Metastasis Free Survival	GUYT	Loi	HG-U133_Plus_2	204444_at	87	0.609195	0.00192019	0.0438065	1.1386	0.0427314	0.394512	1.48 [1.01 - 2.17]
GSE6532-GPL570	Breast cancer		Relapse Free Survival	GUYT	Loi	HG-U133_Plus_2	204444_at	87	0.609195	0.00192019	0.0438065	1.1386	0.0427314	0.394512	1.48 [1.01 - 2.17]
GSE9195	Breast cancer		Distant Metastasis Free Survival	GUYT2	Loi	HG-U133_Plus_2	204444_at	77	0.688312	0.00200433	0.0453753	1.86097	0.0219411	0.817027	2.26 [1.13 - 4.55]
GSE9195	Breast cancer		Relapse Free Survival	GUYT2	Loi	HG-U133_Plus_2	204444_at	77	0.688312	0.028692	0.343805	1.15656	0.0470273	0.598065	1.82 [1.01 - 3.28]
GSE12093	Breast cancer		Distant Metastasis Free Survival	IO, NCI, TUM, CCF (1992-2000)	Zhang	HG-U133A	204444_at	136	0.323529	0.0244556	0.30832	1.33786	0.103533	0.540238	1.72 [0.90 - 3.29]
GSE11121	Breast cancer		Distant Metastasis Free Survival	Mainz (1988-1998)	Schmidt	HG-U133A	204444_at	200	0.855	3.62E-06	0.000177434	1.38656	0.000467951	0.930416	2.54 [1.51 - 4.27]
GSE1378	Breast cancer		Relapse Free Survival	MGH (1987-2000)	Ma	Arcturus 22k	15941	60	0.65	0.12085	-	0.585276	0.262931	0.299761	1.35 [0.80 - 2.28]
GSE1379	Breast cancer		Relapse Free Survival	MGH (1987-2000)	Ma	Arcturus 22k	15941	60	0.15	0.0112282	0.176104	-1.06954	0.570932	-0.163964	0.85 [0.48 - 1.50]
GSE2034	Breast cancer		Distant Metastasis Free Survival	Rotterdam (1980-1995)	Wang	HG-U133A	204444_at	286	0.381119	0.000777501	0.0206193	0.724283	0.000388024	0.716568	2.05 [1.38 - 3.04]
GSE1456-GPL96	Breast cancer		Overall Survival	Stockholm (1994-1996)	Pawitan	HG-U133A	204444_at	159	0.333333	0.000350546	0.0104494	1.68189	0.00423545	0.723176	2.06 [1.26 - 3.38]
GSE1456-GPL96	Breast cancer		Relapse Free Survival	Stockholm (1994-1996)	Pawitan	HG-U133A	204444_at	159	0.333333	8.93E-05	0.00317024	2.00315	0.00108689	0.817343	2.26 [1.39 - 3.70]
GSE1456-GPL96	Breast cancer		Disease Specific Survival	Stockholm (1994-1996)	Pawitan	HG-U133A	204444_at	159	0.333333	0.000702881	0.0189324	2.08698	0.0135069	0.734876	2.09 [1.16 - 3.74]
GSE7378	Breast cancer		Disease Free Survival	UCSF	Zhou	U133AAofAv2	204444_at	54	0.722222	0.00910489	0.150419	1.65452	0.0525168	0.654289	1.92 [0.99 - 3.73]
E-TABM-158	Breast cancer		Overall Survival	UCSF, CPMC (1989-1997)	Chin	HG-U133A	204444_at	117	0.393162	0.105589	-	-0.50941	0.202709	-0.22639	0.80 [0.56 - 1.13]
E-TABM-158	Breast cancer		Distant Metastasis Free Survival	UCSF, CPMC (1989-1997)	Chin	HG-U133A	204444_at	117	0.649573	0.220172	-	-0.538922	0.645591	-0.0963387	0.91 [0.60 - 1.37]
E-TABM-158	Breast cancer		Relapse Free Survival	UCSF, CPMC (1989-1997)	Chin	HG-U133A	204444_at	117	0.393162	0.105589	-	-0.50941	0.202709	-0.22639	0.80 [0.56 - 1.13]
E-TABM-158	Breast cancer		Disease Specific Survival	UCSF, CPMC (1989-1997)	Chin	HG-U133A	204444_at	117	0.649573	0.0244106	0.307928	-1.06135	0.0560503	-0.414748	0.66 [0.43 - 1.01]
GSE3494-GPL96	Breast cancer		Disease Specific Survival	Uppsala (1987-1989)	Miller	HG-U133A	204444_at	236	0.59322	7.59E-05	0.00274544	1.0449	0.000850769	0.741324	2.10 [1.36 - 3.24]
GSE4922-GPL96	Breast cancer		Disease Free Survival	Uppsala (1987-1989)	Ivshina	HG-U133A	204444_at	249	0.413655	2.43E-05	0.000995068	0.984707	0.000146095	0.659119	1.93 [1.38 - 2.72]
GSE2990	Breast cancer		Relapse Free Survival	Uppsala, Oxford	Sotiriou	HG-U133A	204444_at	62	0.629032	0.0251536	0.314347	1.04558	0.0361464	0.520614	1.68 [1.03 - 2.74]
GSE2990	Breast cancer		Distant Metastasis Free Survival	Uppsala, Oxford	Sotiriou	HG-U133A	204444_at	125	0.456	0.00950736	0.155425	1.13944	0.0366556	0.399335	1.49 [1.03 - 2.17]
GSE2990	Breast cancer		Relapse Free Survival	Uppsala, Oxford	Sotiriou	HG-U133A	204444_at	125	0.336	0.0228846	0.294472	0.86103	0.18917	0.204297	1.23 [0.90 - 1.66]
GSE2990	Breast cancer		Distant Metastasis Free Survival	Uppsala, Oxford	Sotiriou	HG-U133A	204444_at	54	0.537037	0.023404	0.299094	1.40801	0.101333	0.500311	1.65 [0.91 - 3.00]
GSE7390	Breast cancer		Overall Survival	Uppsala, Oxford, Stockholm, IGR, GUYT, CRH (1980-1998)	Desmedt	HG-U133A	204444_at	198	0.550505	0.00436774	0.0850601	0.763227	0.00995248	0.379108	1.46 [1.10 - 1.95]
GSE7390	Breast cancer		Relapse Free Survival	Uppsala, Oxford, Stockholm, IGR, GUYT, CRH (1980-1998)	Desmedt	HG-U133A	204444_at	198	0.106061	0.00913186	0.150757	1.41152	0.0582235	0.195141	1.22 [0.99 - 1.49]
GSE7390	Breast cancer		Distant Metastasis Free Survival	Uppsala, Oxford, Stockholm, IGR, GUYT, CRH (1980-1998)	Desmedt	HG-U133A	204444_at	198	0.111111	0.0031917	0.0662126	15.2226	0.0144322	0.335077	1.40 [1.07 - 1.83]
GSE12945	Colorectal cancer		Disease Free Survival	Berlin	Staub	HG-U133A	204444_at	51	0.686275	0.132077	-	-15.6145	0.378409	-0.470826	0.62 [0.22 - 1.78]
GSE12945	Colorectal cancer		Overall Survival	Berlin	Staub	HG-U133A	204444_at	62	0.532258	0.0917205	-	0.992399	0.357365	0.371411	1.45 [0.66 - 3.20]
GSE17536	Colorectal cancer		Disease Specific Survival	MCC	Smith	HG-U133_Plus_2	204444_at	177	0.265537	0.0695867	-	0.604422	0.933548	-0.0160373	0.98 [0.68 - 1.43]
GSE17536	Colorectal cancer		Overall Survival	MCC	Smith	HG-U133_Plus_2	204444_at	177	0.175141	0.00755153	0.130413	1.02263	0.457182	0.130605	1.14 [0.81 - 1.61]
GSE17536	Colorectal cancer		Disease Free Survival	MCC	Smith	HG-U133_Plus_2	204444_at	145	0.744828	0.00889665	0.147802	-1.44872	0.129488	-0.333218	0.72 [0.47 - 1.10]
GSE14333	Colorectal cancer		Disease Free Survival	Melbourne	Jorissen	HG-U133_Plus_2	204444_at	226	0.862832	0.0162661	0.231187	-2.0499	0.0222835	-0.445361	0.64 [0.44 - 0.94]
GSE17537	Colorectal cancer		Overall Survival	VMC	Smith	HG-U133_Plus_2	204444_at	55	0.4	0.472672	-	-0.321643	0.89958	-0.0348239	0.97 [0.56 - 1.66]
GSE17537	Colorectal cancer		Disease Free Survival	VMC	Smith	HG-U133_Plus_2	204444_at	55	0.618182	0.22639	-	-0.635087	0.773557	-0.0820793	0.92 [0.53 - 1.61]
GSE17537	Colorectal cancer		Disease Specific Survival	VMC	Smith	HG-U133_Plus_2	204444_at	49	0.816327	0.330373	-	0.591058	0.894774	0.0524574	1.05 [0.48 - 2.29]
GSE11595	Esophagus cancer	Adenocarcinoma	Overall Survival	Sutton	Giddings	CRUKDMF_22K_v1.0.0	825606	34	0.117647	0.113395	-	1.61696	0.381154	-0.334622	0.72 [0.34 - 1.51]
GSE22138	Eye cancer	Uveal melanoma	Distant Metastasis Free Survival	BRCIC	Laurent	HG-U133_Plus_2	204444_at	63	0.587302	0.016299	0.231524	0.804361	0.263653	0.172998	1.19 [0.88 - 1.61]
GSE2837	Head and neck cancer	Squamous cell carcinoma	Relapse Free Survival	VUMC, VAMC, UTMDACC (1992-2005)	Chung	U133_X3P	g13699823_3p_at	28	0.214286	0.0357819	0.398019	-1.16408	0.459552	-0.319691	0.73 [0.31 - 1.69]
jacob-00182-CANDF	Lung cancer	Adenocarcinoma	Overall Survival	CAN/DF	Shedden	HG-U133A	204444_at	82	0.768293	0.0320193	0.369985	0.768753	0.145657	0.47173	1.60 [0.85 - 3.03]
jacob-00182-HLM	Lung cancer	Adenocarcinoma	Overall Survival	HLM	Shedden	HG-U133A	204444_at	79	0.518987	0.0706642	-	0.470064	0.557331	0.1047	1.11 [0.78 - 1.58]
MICHIGAN-LC	Lung cancer	Adenocarcinoma	Overall Survival	Michigan (1994-2000)	Beer	HuGeneFL	X85137_s_at	86	0.22093	0.080792	-	1.21473	0.34668	0.398228	1.49 [0.65 - 3.41]
jacob-00182-MSK	Lung cancer	Adenocarcinoma	Overall Survival	MSK	Shedden	HG-U133A	204444_at	104	0.528846	0.000583274	0.0161593	1.16803	0.00320315	0.67934	1.97 [1.26 - 3.10]
GSE13213	Lung cancer	Adenocarcinoma	Overall Survival	Nagoya (1995-1999, 2002-2004)	Tomida	G4112F	A_23_P52278	117	0.452991	1.36E-05	0.000591985	1.38218	0.000205902	0.419714	1.52 [1.22 - 1.90]
GSE13213	Lung cancer	Adenocarcinoma	Overall Survival	Nagoya (1995-1999, 2002-2004)	Tomida	G4112F	A_24_P227091	117	0.247863	0.00217693	0.0485493	1.34549	0.00307702	0.497773	1.65 [1.18 - 2.29]
GSE31210	Lung cancer	Adenocarcinoma	Overall Survival	NCCRI	Okayama	HG-U133_Plus_2	204444_at	204	0.828431	1.64E-06	8.56E-05	1.60225	0.000370314	0.876169	2.40 [1.48 - 3.89]
GSE31210	Lung cancer	Adenocarcinoma	Relapse Free Survival	NCCRI	Okayama	HG-U133_Plus_2	204444_at	204	0.75	5.52E-08	3.68E-06	1.37474	4.21E-06	0.807753	2.24 [1.59 - 3.16]
jacob-00182-UM	Lung cancer	Adenocarcinoma	Overall Survival	UM	Shedden	HG-U133A	204444_at	178	0.842697	0.0666557	-	0.457276	0.853437	0.0241536	1.02 [0.79 - 1.32]
GSE11117	Lung cancer	NSCLC	Overall Survival	Basel (2002-2005)	Baty	Novachip human 34.5k	H200001699	41	0.609756	0.026441	0.325271	0.89876	0.139634	0.301107	1.35 [0.91 - 2.02]
GSE3141	Lung cancer	NSCLC	Overall Survival	Duke	Bild	HG-U133_Plus_2	204444_at	111	0.234234	0.0475569	0.476752	0.705509	0.364693	0.150991	1.16 [0.84 - 1.61]
GSE14814	Lung cancer	NSCLC	Overall Survival	JRB.10	Zhu	HG-U133A	204444_at	90	0.288889	0.0832773	-	0.71095	0.623935	0.145482	1.16 [0.65 - 2.07]
GSE14814	Lung cancer	NSCLC	Disease Specific Survival	JRB.10	Zhu	HG-U133A	204444_at	90	0.288889	0.0355499	0.396335	1.07994	0.290009	0.33661	1.40 [0.75 - 2.61]
GSE8894	Lung cancer	NSCLC	Relapse Free Survival	Seoul (1995-2005)	Lee	HG-U133_Plus_2	204444_at	138	0.137681	0.0120416	0.185509	1.13914	0.135029	0.122348	1.13 [0.96 - 1.33]
GSE4573	Lung cancer	Squamous cell carcinoma	Overall Survival	Michigan (1991-2002)	Raponi	HG-U133A	204444_at	129	0.170543	0.072849	-	0.703716	0.814824	0.0755788	1.08 [0.57 - 2.03]
GSE17710	Lung cancer	Squamous cell carcinoma	Relapse Free Survival	UNC	Wilkerson	Agilent-UNC-custom-4X44K	42614	56	0.571429	0.00393499	0.0782932	0.983358	0.0710962	0.661344	1.94 [0.94 - 3.97]
GSE17710	Lung cancer	Squamous cell carcinoma	Overall Survival	UNC	Wilkerson	Agilent-UNC-custom-4X44K	43513	56	0.464286	0.00264426	0.0568775	1.16459	0.0487121	0.385675	1.47 [1.00 - 2.16]
GSE17710	Lung cancer	Squamous cell carcinoma	Relapse Free Survival	UNC	Wilkerson	Agilent-UNC-custom-4X44K	33991	56	0.696429	0.00646759	0.115718	0.934375	0.0635203	0.576326	1.78 [0.97 - 3.27]
GSE17710	Lung cancer	Squamous cell carcinoma	Overall Survival	UNC	Wilkerson	Agilent-UNC-custom-4X44K	42614	56	0.571429	0.00582929	0.106734	0.97205	0.0620699	0.706032	2.03 [0.96 - 4.25]
GSE17710	Lung cancer	Squamous cell carcinoma	Overall Survival	UNC	Wilkerson	Agilent-UNC-custom-4X44K	33991	56	0.821429	0.00609257	0.110472	1.05289	0.0453879	0.645583	1.91 [1.01 - 3.59]
GSE17710	Lung cancer	Squamous cell carcinoma	Relapse Free Survival	UNC	Wilkerson	Agilent-UNC-custom-4X44K	43513	56	0.517857	0.0059111	0.107901	0.95207	0.112344	0.291761	1.34 [0.93 - 1.92]
GSE9891	Ovarian cancer		Overall Survival	AOCS, RBH, WH, NKI-AVL (1992-2006)	Tothill	HG-U133_Plus_2	204444_at	278	0.460432	0.0115953	0.180376	0.486941	0.0165248	0.226859	1.25 [1.04 - 1.51]
DUKE-OC	Ovarian cancer		Overall Survival	Duke	Bild	HG-U133A	204444_at	133	0.488722	0.0955553	-	-0.39417	0.6954	-0.034329	0.97 [0.81 - 1.15]
GSE8841	Ovarian cancer		Overall Survival	Milan (1992-2003)	Marchini	G4100A	3919	81	0.530864	0.0533421	-	1.02582	0.367267	0.201007	1.22 [0.79 - 1.89]
GSE8841	Ovarian cancer		Overall Survival	Milan (1992-2003)	Marchini	G4100A	10544	81	0.222222	0.173798	-	1.31257	0.880752	-0.0874348	0.92 [0.29 - 2.87]
GSE26712	Ovarian cancer		Disease Free Survival	MSKCC (1990-2003)	Bonome	HG-U133_Plus_2	204444_at	185	0.897297	0.219625	-	0.307407	0.914059	0.013953	1.01 [0.79 - 1.31]
GSE26712	Ovarian cancer		Overall Survival	MSKCC (1990-2003)	Bonome	HG-U133_Plus_2	204444_at	185	0.745946	0.0813372	-	0.332535	0.905258	-0.0167705	0.98 [0.75 - 1.30]
GSE17260	Ovarian cancer		Progression Free Survival	Niigata (1997-2008)	Yoshihara	G4112A	A_24_P227091	110	0.436364	0.0843488	-	0.405963	0.557516	0.107524	1.11 [0.78 - 1.59]
GSE17260	Ovarian cancer		Progression Free Survival	Niigata (1997-2008)	Yoshihara	G4112A	A_23_P52278	110	0.145455	0.00326988	0.0675135	1.27165	0.158407	0.167947	1.18 [0.94 - 1.49]
GSE17260	Ovarian cancer		Overall Survival	Niigata (1997-2008)	Yoshihara	G4112A	A_24_P227091	110	0.445455	0.00550277	0.102033	0.880428	0.242241	0.271572	1.31 [0.83 - 2.07]
GSE17260	Ovarian cancer		Overall Survival	Niigata (1997-2008)	Yoshihara	G4112A	A_23_P52278	110	0.145455	0.0230718	0.296143	1.96492	0.238349	0.18678	1.21 [0.88 - 1.64]
GSE14764	Ovarian cancer		Overall Survival	TOC	Denkert	HG-U133A	204444_at	80	0.8125	0.078185	-	0.83168	0.238438	0.317072	1.37 [0.81 - 2.33]
GSE16560	Prostate cancer		Overall Survival	Sweden (1977-1999)	Sboner	6K DASL	DAP2_4206	281	0.252669	0.152259	-	0.238907	0.923374	0.0123838	1.01 [0.79 - 1.30]
E-DKFZ-1	Renal cell carcinoma		Overall Survival	RZPD	Sueltmann	A-RZPD-20	rzpd.de:huber1:Reporter:IMAGE:726497	59	0.813559	0.00566933	0.104441	1.32558	0.109117	1.43239	4.19 [0.73 - 24.16]
GSE19234	Skin cancer	Melanoma	Overall Survival	NYU	Bogunovic	HG-U133_Plus_2	204444_at	38	0.184211	0.00417238	0.0820275	15.76	0.0119342	0.931956	2.54 [1.23 - 5.25]
GSE30929	Soft tissue cancer	Liposarcoma	Distant Recurrence Free Survival	MSKCC (1993-2008)	Gobble	HG-U133A	204444_at	140	0.671429	2.25E-07	1.36E-05	1.42049	9.17E-07	0.643261	1.90 [1.47 - 2.46]
