# Supplementary material for: KIF11 As a Potential Pan-Cancer Immunological Biomarker Encompassing the Disease Staging, Prognoses, Tumor Microenvironment, and Therapeutic Responses
Source: Oxid Med Cell Longev. 2022 Dec 16;2022:2764940. doi: 10.1155/2022/2764940 (PMC9893523; doi:10.1155/2022/2764940)
Supplement: Supplementary 9 — Supplementary Table 4: the relationship between the methylation status of single CpG island of KIF11 and survival of patients with different cancer types. [file 2764940.f9.txt]

Name	Cancer	HR	CI	P.value	LR_test_pvalue	PH_test_Pvalue	Best_split	CHR	MAPINFO	UCSC_RefGene_Name	UCSC_RefGene_Group	Relation_to_UCSC_CpG_Island
cg00519463	GBM	0.563	(0.362;0.877)	0.011064493	0.014559264	0.987322886	q25	10	94352821	KIF11	TSS200	Island
cg00519463	KIRP	1.998	(1.004;3.975)	0.048603055	0.060334325	0.485779787	q75	10	94352821	KIF11	TSS200	Island
cg00519463	BLCA	1.363	(0.956;1.944)	0.087345769	0.078705684	0.83	q25	10	94352821	KIF11	TSS200	Island
cg00519463	SARC	0.683	(0.448;1.041)	0.076153738	0.083578751	0.225	q25	10	94352821	KIF11	TSS200	Island
cg00519463	LIHC	0.742	(0.525;1.047)	0.089594936	0.08881391	0.501	median	10	94352821	KIF11	TSS200	Island
cg00519463	LUAD	0.757	(0.539;1.065)	0.109804633	0.104052504	0.629569495	mean	10	94352821	KIF11	TSS200	Island
cg00519463	ESCA	0.677	(0.424;1.081)	0.10221427	0.109027642	0.246	q25	10	94352821	KIF11	TSS200	Island
cg00519463	UCS	1.898	(0.826;4.358)	0.130948156	0.109153853	0.641819789	q25	10	94352821	KIF11	TSS200	Island
cg00519463	UVM	2.237	(0.752;6.65)	0.147570316	0.117090344	0.466	q25	10	94352821	KIF11	TSS200	Island
cg00519463	UCEC	1.41	(0.885;2.245)	0.148313574	0.146341415	0.564290514	median	10	94352821	KIF11	TSS200	Island
cg00519463	READ	2.041	(0.774;5.38)	0.149312438	0.161653507	0.894	mean	10	94352821	KIF11	TSS200	Island
cg00519463	ACC	0.584	(0.247;1.38)	0.220233201	0.201574095	0.17	mean	10	94352821	KIF11	TSS200	Island
cg00519463	KICH	0.437	(0.109;1.75)	0.242167859	0.226767256	0.877718	median	10	94352821	KIF11	TSS200	Island
cg00519463	LUSC	1.183	(0.862;1.623)	0.297433963	0.297615694	0.594	median	10	94352821	KIF11	TSS200	Island
cg00519463	CESC	1.362	(0.744;2.493)	0.316598417	0.30158793	0.752	q25	10	94352821	KIF11	TSS200	Island
cg00519463	KIRC	0.798	(0.502;1.268)	0.340086247	0.330190269	0.522006961	q75	10	94352821	KIF11	TSS200	Island
cg00519463	LGG	0.828	(0.557;1.229)	0.348264266	0.341657491	0.372	mean	10	94352821	KIF11	TSS200	Island
cg00519463	SKCM	0.886	(0.679;1.154)	0.368588162	0.368412575	0.61	median	10	94352821	KIF11	TSS200	Island
cg00519463	BRCA	1.206	(0.796;1.829)	0.37707889	0.382591836	0.142	q75	10	94352821	KIF11	TSS200	Island
cg00519463	STAD	1.174	(0.797;1.729)	0.41753343	0.41076197	0.799	q25	10	94352821	KIF11	TSS200	Island
cg00519463	LAML	0.854	(0.568;1.284)	0.447685595	0.453148874	0.568	q25	10	94352821	KIF11	TSS200	Island
cg00519463	COAD	0.834	(0.502;1.385)	0.483353286	0.488317192	0.02	q25	10	94352821	KIF11	TSS200	Island
cg00519463	HNSC	1.097	(0.818;1.47)	0.536002831	0.53870544	0.533086193	mean	10	94352821	KIF11	TSS200	Island
cg00519463	PAAD	1.15	(0.73;1.813)	0.546126924	0.541651844	0.125111472	q25	10	94352821	KIF11	TSS200	Island
cg00519463	MESO	1.074	(0.676;1.707)	0.763439946	0.763537908	0.462	median	10	94352821	KIF11	TSS200	Island
cg03468382	KIRP	0.23	(0.123;0.43)	4.14E-06	6.10E-06	0.436153378	q25	10	94353952	KIF11	Body	S_Shore
cg03468382	MESO	0.325	(0.177;0.6)	0.000320155	7.12E-05	0.13	q75	10	94353952	KIF11	Body	S_Shore
cg03468382	UVM	11.164	(1.493;83.501)	0.018772003	0.000627251	0.04	q25	10	94353952	KIF11	Body	S_Shore
cg03468382	LAML	0.558	(0.384;0.811)	0.002187953	0.001941966	0.142	median	10	94353952	KIF11	Body	S_Shore
cg03468382	ACC	0.555	(0.222;1.387)	0.207657382	0.184811449	0.551	q75	10	94353952	KIF11	Body	S_Shore
cg04344917	LGG	0.469	(0.327;0.673)	4.02E-05	3.05E-05	0.087	median	10	94351686	KIF11	TSS1500	N_Shore
cg04344917	ACC	3.733	(1.782;7.822)	0.000481822	0.000762826	0.082	q75	10	94351686	KIF11	TSS1500	N_Shore
cg04344917	LAML	0.594	(0.399;0.884)	0.010168652	0.013094824	0.276	q25	10	94351686	KIF11	TSS1500	N_Shore
cg04344917	HNSC	1.424	(1.067;1.9)	0.01645358	0.0193372	0.812969925	q75	10	94351686	KIF11	TSS1500	N_Shore
cg04344917	READ	2.796	(1.048;7.461)	0.040082301	0.038027588	0.33	mean	10	94351686	KIF11	TSS1500	N_Shore
cg04344917	KIRP	2.182	(0.916;5.199)	0.078254936	0.054784989	0.370439086	q25	10	94351686	KIF11	TSS1500	N_Shore
cg04344917	SKCM	1.308	(0.988;1.731)	0.060348146	0.064290499	0.088	mean	10	94351686	KIF11	TSS1500	N_Shore
cg04344917	BRCA	1.596	(0.906;2.811)	0.105809002	0.087642421	0.707	q25	10	94351686	KIF11	TSS1500	N_Shore
cg04344917	KIRC	0.698	(0.436;1.117)	0.134145996	0.121436437	0.747029078	mean	10	94351686	KIF11	TSS1500	N_Shore
cg04344917	LUSC	0.74	(0.508;1.079)	0.117987972	0.127852462	0.839	q25	10	94351686	KIF11	TSS1500	N_Shore
cg04344917	CESC	1.573	(0.845;2.928)	0.152926631	0.133581532	0.805	q25	10	94351686	KIF11	TSS1500	N_Shore
cg04344917	LUAD	1.262	(0.922;1.728)	0.146175039	0.145337732	0.6601036	median	10	94351686	KIF11	TSS1500	N_Shore
cg04344917	PAAD	1.409	(0.834;2.382)	0.200366496	0.184466406	0.911905568	q25	10	94351686	KIF11	TSS1500	N_Shore
cg04344917	UCEC	0.72	(0.411;1.259)	0.249099035	0.235561018	0.14942764	q75	10	94351686	KIF11	TSS1500	N_Shore
cg04344917	COAD	0.77	(0.47;1.261)	0.299551212	0.294527655	0.535	mean	10	94351686	KIF11	TSS1500	N_Shore
cg04344917	BLCA	1.201	(0.847;1.702)	0.303880811	0.296088919	0.909	q25	10	94351686	KIF11	TSS1500	N_Shore
cg04344917	ESCA	1.203	(0.749;1.93)	0.444719221	0.448824942	0.216	mean	10	94351686	KIF11	TSS1500	N_Shore
cg04344917	LIHC	0.859	(0.573;1.287)	0.461016397	0.467003733	0.214	q25	10	94351686	KIF11	TSS1500	N_Shore
cg04344917	UVM	0.731	(0.284;1.885)	0.517231555	0.527199625	0.828	q25	10	94351686	KIF11	TSS1500	N_Shore
cg04344917	STAD	0.886	(0.601;1.306)	0.54199836	0.537579405	0.12	q75	10	94351686	KIF11	TSS1500	N_Shore
cg04344917	UCS	0.834	(0.429;1.625)	0.594384571	0.594330501	0.934777676	median	10	94351686	KIF11	TSS1500	N_Shore
cg04344917	MESO	0.881	(0.539;1.44)	0.613628167	0.611247538	0.196	mean	10	94351686	KIF11	TSS1500	N_Shore
cg07673866	LGG	0.368	(0.256;0.53)	7.57E-08	3.12E-07	0.058	q25	10	94351376	KIF11	TSS1500	Island
cg07673866	LUSC	1.822	(1.178;2.817)	0.007019586	0.00397484	0.653	q25	10	94351376	KIF11	TSS1500	Island
cg07673866	ACC	2.792	(1.32;5.905)	0.007219341	0.01018077	0.037	q75	10	94351376	KIF11	TSS1500	Island
cg07673866	LIHC	1.732	(1.086;2.763)	0.021192233	0.01440323	0.649	q25	10	94351376	KIF11	TSS1500	Island
cg07673866	GBM	0.564	(0.36;0.883)	0.012320553	0.015719379	0.370104716	q25	10	94351376	KIF11	TSS1500	Island
cg07673866	MESO	1.729	(0.957;3.124)	0.069867825	0.05658247	0.364	q25	10	94351376	KIF11	TSS1500	Island
cg07673866	UCEC	1.705	(0.952;3.057)	0.072906411	0.058914709	0.555577818	q25	10	94351376	KIF11	TSS1500	Island
cg07673866	BLCA	1.299	(0.968;1.744)	0.081067295	0.08046654	0.313	median	10	94351376	KIF11	TSS1500	Island
cg07673866	SKCM	0.781	(0.579;1.053)	0.105268656	0.099047036	0.024	q75	10	94351376	KIF11	TSS1500	Island
cg07673866	KIRP	1.86	(0.78;4.436)	0.16181221	0.133672162	0.512682072	q25	10	94351376	KIF11	TSS1500	Island
cg07673866	PAAD	1.444	(0.874;2.383)	0.1512402	0.136778432	0.16926685	q25	10	94351376	KIF11	TSS1500	Island
cg07673866	READ	2.654	(0.606;11.62)	0.195110957	0.143924405	0.274	q25	10	94351376	KIF11	TSS1500	Island
cg07673866	KICH	2.511	(0.67;9.411)	0.172118672	0.186081155	0.01975822	q75	10	94351376	KIF11	TSS1500	Island
cg07673866	UCS	0.619	(0.294;1.302)	0.206107504	0.221884568	0.113304857	q25	10	94351376	KIF11	TSS1500	Island
cg07673866	COAD	1.363	(0.785;2.367)	0.271145729	0.259534475	0.186	q25	10	94351376	KIF11	TSS1500	Island
cg07673866	LAML	0.816	(0.567;1.176)	0.276079096	0.275655066	0.228	median	10	94351376	KIF11	TSS1500	Island
cg07673866	STAD	1.173	(0.851;1.616)	0.329150985	0.329575372	0.814	mean	10	94351376	KIF11	TSS1500	Island
cg07673866	HNSC	0.878	(0.671;1.149)	0.341922465	0.340635688	0.34612844	mean	10	94351376	KIF11	TSS1500	Island
cg07673866	UVM	0.63	(0.214;1.853)	0.401095992	0.378149444	0.408	q75	10	94351376	KIF11	TSS1500	Island
cg07673866	SARC	1.188	(0.754;1.87)	0.45793753	0.451752746	0.241	q25	10	94351376	KIF11	TSS1500	Island
cg07673866	KIRC	0.85	(0.545;1.326)	0.474217702	0.480284377	0.953118082	q25	10	94351376	KIF11	TSS1500	Island
cg07673866	LUAD	0.917	(0.67;1.255)	0.588411798	0.5882999	0.094271956	median	10	94351376	KIF11	TSS1500	Island
cg07673866	BRCA	0.898	(0.575;1.402)	0.635069823	0.632137768	0.13	q75	10	94351376	KIF11	TSS1500	Island
cg07673866	ESCA	0.914	(0.564;1.483)	0.717031366	0.718567347	0.223	q25	10	94351376	KIF11	TSS1500	Island
cg07673866	CESC	1.083	(0.628;1.869)	0.773847482	0.772326962	0.328	q25	10	94351376	KIF11	TSS1500	Island
cg08455454	UCEC	2.252	(1.397;3.631)	0.000863091	0.001444936	0.46622844	q75	10	94352726	KIF11	TSS200	Island
cg08455454	LGG	1.95	(1.252;3.037)	0.003116944	0.00175829	0.752	q25	10	94352726	KIF11	TSS200	Island
cg08455454	BLCA	1.476	(1.1;1.981)	0.009534042	0.009397167	0.08	median	10	94352726	KIF11	TSS200	Island
cg08455454	GBM	0.568	(0.361;0.894)	0.014515889	0.018942868	0.482316023	q25	10	94352726	KIF11	TSS200	Island
cg08455454	ACC	0.405	(0.185;0.889)	0.024221142	0.020163461	0.948	mean	10	94352726	KIF11	TSS200	Island
cg08455454	BRCA	0.644	(0.428;0.969)	0.034750847	0.031586852	0.134	mean	10	94352726	KIF11	TSS200	Island
cg08455454	KIRC	0.645	(0.425;0.979)	0.039351208	0.034631205	0.815627467	mean	10	94352726	KIF11	TSS200	Island
cg08455454	LAML	0.683	(0.464;1.006)	0.053784629	0.049606945	0.833	mean	10	94352726	KIF11	TSS200	Island
cg08455454	MESO	1.609	(0.937;2.763)	0.084372494	0.097174064	0.667	q75	10	94352726	KIF11	TSS200	Island
cg08455454	CESC	1.59	(0.871;2.904)	0.130937954	0.113359218	0.979	q25	10	94352726	KIF11	TSS200	Island
cg08455454	SKCM	1.243	(0.949;1.629)	0.114330824	0.116957382	0.49	mean	10	94352726	KIF11	TSS200	Island
cg08455454	UCS	1.791	(0.809;3.966)	0.150863818	0.132169837	0.196408282	q25	10	94352726	KIF11	TSS200	Island
cg08455454	HNSC	0.802	(0.604;1.066)	0.128537697	0.133996705	0.615554843	q25	10	94352726	KIF11	TSS200	Island
cg08455454	STAD	0.776	(0.527;1.143)	0.199099041	0.188912516	0.658	q75	10	94352726	KIF11	TSS200	Island
cg08455454	SARC	1.292	(0.809;2.064)	0.283170305	0.272695141	0.74	q25	10	94352726	KIF11	TSS200	Island
cg08455454	PAAD	1.237	(0.824;1.857)	0.304984043	0.308318309	0.428865928	mean	10	94352726	KIF11	TSS200	Island
cg08455454	READ	0.606	(0.208;1.761)	0.357250023	0.373269925	0.678	q25	10	94352726	KIF11	TSS200	Island
cg08455454	LUSC	0.867	(0.631;1.19)	0.375936398	0.375253807	0.695	median	10	94352726	KIF11	TSS200	Island
cg08455454	KIRP	0.724	(0.344;1.523)	0.394132833	0.380749931	0.232621963	q75	10	94352726	KIF11	TSS200	Island
cg08455454	LIHC	1.189	(0.791;1.788)	0.40451989	0.397300537	0.217	q25	10	94352726	KIF11	TSS200	Island
cg08455454	COAD	0.807	(0.465;1.4)	0.445296968	0.437510797	0.004	mean	10	94352726	KIF11	TSS200	Island
cg08455454	ESCA	0.864	(0.551;1.356)	0.524918878	0.524973818	0.403	median	10	94352726	KIF11	TSS200	Island
cg08455454	LUAD	0.916	(0.667;1.257)	0.586647978	0.585905717	0.137134385	mean	10	94352726	KIF11	TSS200	Island
cg08455454	UVM	0.796	(0.348;1.818)	0.587991977	0.586540215	0.429	mean	10	94352726	KIF11	TSS200	Island
cg11150664	LGG	0.499	(0.337;0.738)	0.000510186	0.000286603	0.923	mean	10	94351507	KIF11	TSS1500	Island
cg11150664	KICH	7.295	(1.786;29.797)	0.005645163	0.004174934	0.00350328	q75	10	94351507	KIF11	TSS1500	Island
cg11150664	LUAD	0.645	(0.455;0.914)	0.013810729	0.017128875	0.27243836	q25	10	94351507	KIF11	TSS1500	Island
cg11150664	GBM	0.59	(0.375;0.927)	0.022233829	0.027858772	0.850073094	q25	10	94351507	KIF11	TSS1500	Island
cg11150664	ACC	2.416	(1.132;5.158)	0.022631751	0.029415728	0.606	q75	10	94351507	KIF11	TSS1500	Island
cg11150664	BLCA	1.409	(0.981;2.025)	0.063452845	0.055281493	0.444	q25	10	94351507	KIF11	TSS1500	Island
cg11150664	CESC	1.546	(0.945;2.528)	0.082933533	0.091382702	0.008	q75	10	94351507	KIF11	TSS1500	Island
cg11150664	BRCA	0.732	(0.494;1.086)	0.121574237	0.11873465	0.81	median	10	94351507	KIF11	TSS1500	Island
cg11150664	KIRC	0.745	(0.506;1.098)	0.137081619	0.135024172	0.78815213	median	10	94351507	KIF11	TSS1500	Island
cg11150664	UCS	0.633	(0.32;1.25)	0.18783738	0.185806671	0.397151133	median	10	94351507	KIF11	TSS1500	Island
cg11150664	STAD	1.213	(0.878;1.676)	0.242274831	0.240626972	0.187	median	10	94351507	KIF11	TSS1500	Island
cg11150664	READ	2.215	(0.499;9.821)	0.29544581	0.250260355	0.641	q25	10	94351507	KIF11	TSS1500	Island
cg11150664	KIRP	1.537	(0.708;3.338)	0.277255081	0.257648718	0.683418586	q25	10	94351507	KIF11	TSS1500	Island
cg11150664	COAD	0.774	(0.466;1.287)	0.3240169	0.331871447	0.437	q25	10	94351507	KIF11	TSS1500	Island
cg11150664	MESO	1.226	(0.769;1.957)	0.392181324	0.392796134	0.224	median	10	94351507	KIF11	TSS1500	Island
cg11150664	UVM	1.462	(0.613;3.487)	0.3911781	0.401027914	0.935	q75	10	94351507	KIF11	TSS1500	Island
cg11150664	ESCA	1.223	(0.757;1.977)	0.410573612	0.416259286	0.033	mean	10	94351507	KIF11	TSS1500	Island
cg11150664	LAML	0.85	(0.552;1.309)	0.461666327	0.455373943	0.971	q75	10	94351507	KIF11	TSS1500	Island
cg11150664	LIHC	0.879	(0.624;1.239)	0.461780015	0.461065607	0.554	median	10	94351507	KIF11	TSS1500	Island
cg11150664	LUSC	0.878	(0.604;1.276)	0.495013064	0.490134714	0.283	q75	10	94351507	KIF11	TSS1500	Island
cg11150664	SARC	1.147	(0.772;1.703)	0.497454169	0.496927552	0.995	median	10	94351507	KIF11	TSS1500	Island
cg11150664	UCEC	1.207	(0.69;2.109)	0.50988437	0.502859138	0.361651215	q25	10	94351507	KIF11	TSS1500	Island
cg11150664	PAAD	0.888	(0.582;1.355)	0.5806231	0.578118472	0.838884587	mean	10	94351507	KIF11	TSS1500	Island
cg11150664	SKCM	1.079	(0.804;1.447)	0.614121451	0.616092454	0.354	q75	10	94351507	KIF11	TSS1500	Island
cg12692187	KIRC	1.92	(1.288;2.863)	0.001358623	0.002010444	0.194562269	q75	10	94353140	KIF11	1stExon	Island
cg12692187	SARC	0.648	(0.434;0.967)	0.033830064	0.032326209	0.342	median	10	94353140	KIF11	1stExon	Island
cg12692187	HNSC	0.751	(0.575;0.981)	0.035778092	0.03574464	0.634595766	median	10	94353140	KIF11	1stExon	Island
cg12692187	UCEC	0.559	(0.3;1.04)	0.066372264	0.050820369	0.219427897	q75	10	94353140	KIF11	1stExon	Island
cg12692187	LIHC	1.43	(1.003;2.038)	0.048123329	0.051523526	0.045	mean	10	94353140	KIF11	1stExon	Island
cg12692187	READ	0.361	(0.117;1.114)	0.076457334	0.05650142	0.187	median	10	94353140	KIF11	1stExon	Island
cg12692187	LGG	0.702	(0.473;1.042)	0.079347325	0.072077738	0.94	mean	10	94353140	KIF11	1stExon	Island
cg12692187	LUSC	0.76	(0.539;1.07)	0.11605256	0.110035657	0.356	mean	10	94353140	KIF11	1stExon	Island
cg12692187	PAAD	1.386	(0.9;2.137)	0.138677263	0.14738499	0.278399664	q75	10	94353140	KIF11	1stExon	Island
cg12692187	GBM	0.721	(0.46;1.13)	0.153809212	0.16372364	0.684964013	q25	10	94353140	KIF11	1stExon	Island
cg12692187	BLCA	1.225	(0.91;1.649)	0.181011546	0.183211718	1	mean	10	94353140	KIF11	1stExon	Island
cg12692187	SKCM	1.167	(0.89;1.53)	0.263563068	0.266171371	0.714	mean	10	94353140	KIF11	1stExon	Island
cg12692187	STAD	1.227	(0.837;1.799)	0.29365721	0.28489542	0.586	q25	10	94353140	KIF11	1stExon	Island
cg12692187	UCS	0.694	(0.329;1.464)	0.337668886	0.349861021	0.778044897	q25	10	94353140	KIF11	1stExon	Island
cg12692187	UVM	0.617	(0.209;1.819)	0.380891456	0.35690079	0.383	q75	10	94353140	KIF11	1stExon	Island
cg12692187	LUAD	1.182	(0.825;1.694)	0.36312079	0.35703112	0.617991748	q25	10	94353140	KIF11	1stExon	Island
cg12692187	CESC	0.798	(0.475;1.342)	0.395571375	0.403454023	0.557	q25	10	94353140	KIF11	1stExon	Island
cg12692187	KIRP	1.314	(0.695;2.482)	0.40105869	0.405850424	0.079561531	mean	10	94353140	KIF11	1stExon	Island
cg12692187	LAML	1.119	(0.776;1.612)	0.54799923	0.547731569	0.082	median	10	94353140	KIF11	1stExon	Island
cg12692187	ESCA	1.151	(0.696;1.905)	0.583957779	0.580092074	0.203	q25	10	94353140	KIF11	1stExon	Island
cg12692187	KICH	1.476	(0.368;5.913)	0.582322353	0.591261104	0.953711868	q75	10	94353140	KIF11	1stExon	Island
cg12692187	MESO	1.146	(0.677;1.938)	0.611936024	0.608230105	0.795	q25	10	94353140	KIF11	1stExon	Island
cg12692187	COAD	0.893	(0.527;1.512)	0.673569184	0.67598326	0.38	q25	10	94353140	KIF11	1stExon	Island
cg12692187	ACC	0.952	(0.455;1.989)	0.895524657	0.895445408	0.637	median	10	94353140	KIF11	1stExon	Island
cg16340918	KIRC	0.467	(0.306;0.712)	0.000410815	0.000231349	0.796351246	mean	10	94352700	KIF11	TSS200	Island
cg16340918	ESCA	0.569	(0.352;0.921)	0.021616898	0.018380607	0.89	mean	10	94352700	KIF11	TSS200	Island
cg16340918	MESO	0.573	(0.34;0.965)	0.036343911	0.044913788	0.624	q25	10	94352700	KIF11	TSS200	Island
cg16340918	UCS	2.259	(0.93;5.488)	0.071869781	0.05108849	0.164059355	q25	10	94352700	KIF11	TSS200	Island
cg16340918	KIRP	2.169	(0.91;5.171)	0.080721853	0.056991292	0.674231201	q25	10	94352700	KIF11	TSS200	Island
cg16340918	KICH	3.807	(0.789;18.371)	0.095989689	0.066658588	0.079776597	median	10	94352700	KIF11	TSS200	Island
cg16340918	LIHC	1.438	(0.941;2.196)	0.093127511	0.082308691	0.446	q25	10	94352700	KIF11	TSS200	Island
cg16340918	UCEC	1.545	(0.947;2.52)	0.081378926	0.090014452	0.190519822	q75	10	94352700	KIF11	TSS200	Island
cg16340918	GBM	0.738	(0.489;1.112)	0.146493569	0.146088125	0.927711876	median	10	94352700	KIF11	TSS200	Island
cg16340918	SARC	0.755	(0.487;1.171)	0.210080467	0.219754027	0.721	q25	10	94352700	KIF11	TSS200	Island
cg16340918	LUAD	1.245	(0.865;1.792)	0.237721796	0.229573287	0.377679011	q25	10	94352700	KIF11	TSS200	Island
cg16340918	CESC	0.755	(0.474;1.204)	0.237700112	0.237183061	0.975	median	10	94352700	KIF11	TSS200	Island
cg16340918	PAAD	1.261	(0.843;1.887)	0.259407563	0.262314419	0.360212311	mean	10	94352700	KIF11	TSS200	Island
cg16340918	SKCM	0.848	(0.624;1.152)	0.290433505	0.297114422	0.57	q25	10	94352700	KIF11	TSS200	Island
cg16340918	BRCA	0.788	(0.487;1.273)	0.329604956	0.318516804	0.445	q75	10	94352700	KIF11	TSS200	Island
cg16340918	COAD	0.783	(0.479;1.28)	0.329138893	0.324268257	0.97	mean	10	94352700	KIF11	TSS200	Island
cg16340918	ACC	0.681	(0.288;1.613)	0.382335352	0.368065649	0.69	q75	10	94352700	KIF11	TSS200	Island
cg16340918	READ	0.627	(0.231;1.702)	0.359390038	0.371812995	0.818	q25	10	94352700	KIF11	TSS200	Island
cg16340918	STAD	1.179	(0.82;1.694)	0.373572614	0.379804151	0.78	q75	10	94352700	KIF11	TSS200	Island
cg16340918	LGG	1.132	(0.77;1.666)	0.527288607	0.53079222	0.592	q75	10	94352700	KIF11	TSS200	Island
cg16340918	HNSC	1.095	(0.802;1.495)	0.566016751	0.562929202	0.070202112	q25	10	94352700	KIF11	TSS200	Island
cg16340918	BLCA	0.925	(0.663;1.291)	0.648562426	0.650587697	0.111	q25	10	94352700	KIF11	TSS200	Island
cg16340918	LAML	0.912	(0.601;1.382)	0.663495474	0.665858855	0.967	q25	10	94352700	KIF11	TSS200	Island
cg16340918	UVM	0.842	(0.366;1.937)	0.685907852	0.68505626	0.203	mean	10	94352700	KIF11	TSS200	Island
cg16340918	LUSC	0.962	(0.679;1.362)	0.826599712	0.827061088	0.215	q25	10	94352700	KIF11	TSS200	Island
cg18863837	UCS	0.328	(0.156;0.692)	0.003387034	0.002013658	0.207874569	mean	10	94352819	KIF11	TSS200	Island
cg18863837	BRCA	0.533	(0.353;0.806)	0.00284584	0.004160517	0.691	q25	10	94352819	KIF11	TSS200	Island
cg18863837	UVM	0.382	(0.156;0.932)	0.034510398	0.026933112	0.864	median	10	94352819	KIF11	TSS200	Island
cg18863837	UCEC	1.684	(1.031;2.748)	0.037168131	0.043836969	0.124109487	q75	10	94352819	KIF11	TSS200	Island
cg18863837	CESC	1.689	(0.925;3.086)	0.088208925	0.072251737	0.99	q25	10	94352819	KIF11	TSS200	Island
cg18863837	ESCA	1.506	(0.958;2.368)	0.076260795	0.076820655	0.994	mean	10	94352819	KIF11	TSS200	Island
cg18863837	BLCA	1.282	(0.956;1.718)	0.096505308	0.096632517	0.4	mean	10	94352819	KIF11	TSS200	Island
cg18863837	LIHC	0.732	(0.493;1.087)	0.122119842	0.131408624	0.622	q25	10	94352819	KIF11	TSS200	Island
cg18863837	SKCM	1.229	(0.939;1.609)	0.133999246	0.131887942	0.367	median	10	94352819	KIF11	TSS200	Island
cg18863837	COAD	0.715	(0.439;1.167)	0.179388997	0.174450789	0.223	median	10	94352819	KIF11	TSS200	Island
cg18863837	MESO	0.692	(0.41;1.167)	0.16757343	0.179264546	0.335	q25	10	94352819	KIF11	TSS200	Island
cg18863837	SARC	0.738	(0.476;1.144)	0.174037743	0.184070346	0.573	q25	10	94352819	KIF11	TSS200	Island
cg18863837	LGG	0.771	(0.502;1.185)	0.235447526	0.224739823	0.102	q75	10	94352819	KIF11	TSS200	Island
cg18863837	KIRC	0.758	(0.477;1.205)	0.241130428	0.229476136	0.463580336	q75	10	94352819	KIF11	TSS200	Island
cg18863837	LUSC	1.186	(0.863;1.63)	0.293125467	0.293341517	0.867	median	10	94352819	KIF11	TSS200	Island
cg18863837	KIRP	1.428	(0.735;2.774)	0.293286117	0.304087653	0.47208931	q75	10	94352819	KIF11	TSS200	Island
cg18863837	LUAD	1.2	(0.831;1.732)	0.330041344	0.322741365	0.48601678	q25	10	94352819	KIF11	TSS200	Island
cg18863837	HNSC	1.138	(0.847;1.528)	0.392449932	0.397081545	0.870064115	q75	10	94352819	KIF11	TSS200	Island
cg18863837	GBM	1.222	(0.766;1.949)	0.399214957	0.406894766	0.572693222	q75	10	94352819	KIF11	TSS200	Island
cg18863837	LAML	0.866	(0.563;1.333)	0.513405377	0.508115508	0.552	q75	10	94352819	KIF11	TSS200	Island
cg18863837	KICH	0.614	(0.127;2.958)	0.542787767	0.525520997	0.14060324	mean	10	94352819	KIF11	TSS200	Island
cg18863837	STAD	1.117	(0.758;1.646)	0.575549527	0.571711837	0.637	q25	10	94352819	KIF11	TSS200	Island
cg18863837	READ	0.748	(0.241;2.324)	0.615391808	0.624220233	0.104	q25	10	94352819	KIF11	TSS200	Island
cg18863837	PAAD	0.894	(0.571;1.399)	0.624203869	0.627112804	0.530237126	q25	10	94352819	KIF11	TSS200	Island
cg18863837	ACC	1.168	(0.562;2.427)	0.676631072	0.677039228	0.893	mean	10	94352819	KIF11	TSS200	Island
cg25122252	CESC	2.139	(1.345;3.4)	0.001308204	0.001381266	0.89	mean	10	94352943	KIF11	1stExon;5'UTR	Island
cg25122252	KIRC	0.47	(0.279;0.793)	0.004610794	0.002164609	0.96248946	q75	10	94352943	KIF11	1stExon;5'UTR	Island
cg25122252	KICH	8.157	(1.02;65.237)	0.047866427	0.0118678	0.735317119	median	10	94352943	KIF11	1stExon;5'UTR	Island
cg25122252	UCEC	1.737	(1.069;2.821)	0.025688149	0.030935166	0.86010124	q75	10	94352943	KIF11	1stExon;5'UTR	Island
cg25122252	STAD	1.52	(1.018;2.268)	0.040593674	0.033085371	0.521	q25	10	94352943	KIF11	1stExon;5'UTR	Island
cg25122252	BLCA	1.297	(0.967;1.74)	0.082556943	0.083405205	0.664	mean	10	94352943	KIF11	1stExon;5'UTR	Island
cg25122252	MESO	1.446	(0.905;2.311)	0.123247408	0.124051236	0.762	median	10	94352943	KIF11	1stExon;5'UTR	Island
cg25122252	LUSC	0.811	(0.591;1.114)	0.196405952	0.195397528	0.748	median	10	94352943	KIF11	1stExon;5'UTR	Island
cg25122252	SARC	0.755	(0.493;1.155)	0.195340593	0.20370326	0.764	q25	10	94352943	KIF11	1stExon;5'UTR	Island
cg25122252	ACC	0.588	(0.238;1.45)	0.248561585	0.226079664	0.633	q75	10	94352943	KIF11	1stExon;5'UTR	Island
cg25122252	READ	1.773	(0.666;4.72)	0.25137247	0.247000675	0.828	mean	10	94352943	KIF11	1stExon;5'UTR	Island
cg25122252	BRCA	0.763	(0.472;1.234)	0.270177973	0.257855692	0.981	q75	10	94352943	KIF11	1stExon;5'UTR	Island
cg25122252	KIRP	1.525	(0.699;3.326)	0.28845953	0.269504494	0.414499043	q25	10	94352943	KIF11	1stExon;5'UTR	Island
cg25122252	LUAD	1.182	(0.864;1.617)	0.296222436	0.29690694	0.972414931	mean	10	94352943	KIF11	1stExon;5'UTR	Island
cg25122252	SKCM	1.171	(0.873;1.571)	0.29226675	0.297826483	0.303	q75	10	94352943	KIF11	1stExon;5'UTR	Island
cg25122252	ESCA	0.793	(0.505;1.243)	0.311509854	0.309861277	0.275	median	10	94352943	KIF11	1stExon;5'UTR	Island
cg25122252	HNSC	0.851	(0.618;1.172)	0.324289536	0.317102416	0.766916057	q75	10	94352943	KIF11	1stExon;5'UTR	Island
cg25122252	LAML	1.204	(0.787;1.843)	0.39221421	0.384833918	0.474	q25	10	94352943	KIF11	1stExon;5'UTR	Island
cg25122252	COAD	0.804	(0.483;1.341)	0.403447335	0.39789468	0.072	mean	10	94352943	KIF11	1stExon;5'UTR	Island
cg25122252	PAAD	1.197	(0.79;1.813)	0.396913421	0.401062881	0.167159667	mean	10	94352943	KIF11	1stExon;5'UTR	Island
cg25122252	GBM	0.822	(0.516;1.309)	0.407865239	0.415427126	0.214293437	q25	10	94352943	KIF11	1stExon;5'UTR	Island
cg25122252	UCS	1.294	(0.664;2.522)	0.449006927	0.450144786	0.496437628	mean	10	94352943	KIF11	1stExon;5'UTR	Island
cg25122252	UVM	0.693	(0.236;2.039)	0.505518323	0.488872859	0.716	q75	10	94352943	KIF11	1stExon;5'UTR	Island
cg25122252	LIHC	0.917	(0.651;1.291)	0.619271104	0.619096193	0.651	median	10	94352943	KIF11	1stExon;5'UTR	Island
cg25494789	KIRC	0.492	(0.292;0.829)	0.007715969	0.004100837	0.498965655	q75	10	94353331	KIF11	Body	S_Shore
cg25494789	KIRP	2.558	(1.002;6.533)	0.049617814	0.027916882	0.091506207	q25	10	94353331	KIF11	Body	S_Shore
cg25494789	MESO	0.539	(0.316;0.918)	0.022902002	0.030360799	0.182	q25	10	94353331	KIF11	Body	S_Shore
cg25494789	SKCM	1.336	(1.018;1.753)	0.03662493	0.036212997	0.017	median	10	94353331	KIF11	Body	S_Shore
cg25494789	UCS	0.508	(0.249;1.033)	0.061351415	0.071699263	0.783782875	q25	10	94353331	KIF11	Body	S_Shore
cg25494789	CESC	1.515	(0.952;2.411)	0.079726516	0.079085646	0.797	mean	10	94353331	KIF11	Body	S_Shore
cg25494789	BLCA	1.36	(0.943;1.96)	0.099661752	0.089874677	0.252	q25	10	94353331	KIF11	Body	S_Shore
cg25494789	LUSC	0.718	(0.482;1.072)	0.104970748	0.094047052	0.736	q75	10	94353331	KIF11	Body	S_Shore
cg25494789	STAD	0.743	(0.519;1.062)	0.103079495	0.111016957	0.35	q25	10	94353331	KIF11	Body	S_Shore
cg25494789	UVM	0.507	(0.172;1.496)	0.218427727	0.187388018	0.288	q75	10	94353331	KIF11	Body	S_Shore
cg25494789	READ	0.498	(0.18;1.376)	0.178534504	0.195235808	0.609	q25	10	94353331	KIF11	Body	S_Shore
cg25494789	HNSC	1.236	(0.89;1.716)	0.205362558	0.196167059	0.111799686	q25	10	94353331	KIF11	Body	S_Shore
cg25494789	ESCA	1.336	(0.849;2.101)	0.209997238	0.208466572	0.797	median	10	94353331	KIF11	Body	S_Shore
cg25494789	BRCA	1.351	(0.82;2.227)	0.237567933	0.223303752	0.17	q25	10	94353331	KIF11	Body	S_Shore
cg25494789	ACC	1.482	(0.715;3.075)	0.29052144	0.290964594	0.135	mean	10	94353331	KIF11	Body	S_Shore
cg25494789	LAML	0.823	(0.57;1.188)	0.298308705	0.296801347	0.464	mean	10	94353331	KIF11	Body	S_Shore
cg25494789	GBM	0.79	(0.502;1.245)	0.310191466	0.318800438	0.938254587	q25	10	94353331	KIF11	Body	S_Shore
cg25494789	COAD	0.784	(0.466;1.32)	0.360161601	0.368662757	0.373	q25	10	94353331	KIF11	Body	S_Shore
cg25494789	PAAD	1.22	(0.773;1.927)	0.393600567	0.401240257	0.55107062	q75	10	94353331	KIF11	Body	S_Shore
cg25494789	SARC	0.845	(0.569;1.256)	0.405491055	0.404574513	0.866	median	10	94353331	KIF11	Body	S_Shore
cg25494789	LUAD	1.095	(0.8;1.498)	0.570898311	0.570920584	0.673607411	median	10	94353331	KIF11	Body	S_Shore
cg25494789	KICH	1.42	(0.354;5.691)	0.620685297	0.628061555	0.233170278	q75	10	94353331	KIF11	Body	S_Shore
cg25494789	LIHC	0.983	(0.697;1.386)	0.921739301	0.921747435	0.694	median	10	94353331	KIF11	Body	S_Shore
cg25914931	CESC	2.136	(1.322;3.451)	0.001928557	0.002805082	0.015	q75	10	94352760	KIF11	TSS200	Island
cg25914931	LGG	1.674	(1.069;2.623)	0.024421458	0.018060124	0.757	q25	10	94352760	KIF11	TSS200	Island
cg25914931	MESO	0.507	(0.296;0.868)	0.013184601	0.018738711	0.054	q25	10	94352760	KIF11	TSS200	Island
cg25914931	SKCM	1.385	(1.014;1.893)	0.040499264	0.035466287	0.948	q25	10	94352760	KIF11	TSS200	Island
cg25914931	KICH	4.421	(0.917;21.309)	0.063952664	0.039858996	0.452605949	median	10	94352760	KIF11	TSS200	Island
cg25914931	STAD	1.381	(1.001;1.906)	0.049166387	0.049380807	0.274	mean	10	94352760	KIF11	TSS200	Island
cg25914931	GBM	0.647	(0.408;1.026)	0.064400362	0.057228622	0.83477386	mean	10	94352760	KIF11	TSS200	Island
cg25914931	BLCA	1.304	(0.924;1.839)	0.130456038	0.122150724	0.185	q25	10	94352760	KIF11	TSS200	Island
cg25914931	READ	2.694	(0.612;11.854)	0.18976982	0.139134889	0.412	q25	10	94352760	KIF11	TSS200	Island
cg25914931	KIRC	0.727	(0.457;1.156)	0.177443295	0.165258571	0.656548809	q75	10	94352760	KIF11	TSS200	Island
cg25914931	ESCA	0.706	(0.435;1.146)	0.158567634	0.168418409	0.486	q25	10	94352760	KIF11	TSS200	Island
cg25914931	PAAD	0.733	(0.473;1.137)	0.165977482	0.175930666	0.776580218	q25	10	94352760	KIF11	TSS200	Island
cg25914931	HNSC	1.187	(0.911;1.546)	0.204168528	0.203405453	0.462186108	median	10	94352760	KIF11	TSS200	Island
cg25914931	KIRP	0.672	(0.356;1.268)	0.220045111	0.215501958	0.511606886	median	10	94352760	KIF11	TSS200	Island
cg25914931	LAML	0.766	(0.505;1.163)	0.211118873	0.221165321	0.769	q25	10	94352760	KIF11	TSS200	Island
cg25914931	BRCA	1.347	(0.824;2.2)	0.234928602	0.221428225	0.973	q25	10	94352760	KIF11	TSS200	Island
cg25914931	LUAD	0.803	(0.568;1.137)	0.21674787	0.224167713	0.607357644	q25	10	94352760	KIF11	TSS200	Island
cg25914931	ACC	0.606	(0.274;1.337)	0.214582292	0.230426731	0.318	q25	10	94352760	KIF11	TSS200	Island
cg25914931	UVM	0.626	(0.265;1.479)	0.285681667	0.276279406	0.688	median	10	94352760	KIF11	TSS200	Island
cg25914931	LIHC	1.219	(0.819;1.814)	0.329053378	0.321462732	0.677	q25	10	94352760	KIF11	TSS200	Island
cg25914931	SARC	0.802	(0.52;1.237)	0.318568428	0.326238664	0.493	q25	10	94352760	KIF11	TSS200	Island
cg25914931	LUSC	0.878	(0.629;1.224)	0.441720092	0.438766306	0.482	mean	10	94352760	KIF11	TSS200	Island
cg25914931	COAD	1.189	(0.74;1.909)	0.474788399	0.474859452	0.791	median	10	94352760	KIF11	TSS200	Island
cg25914931	UCS	0.806	(0.381;1.702)	0.571221334	0.576728631	0.140227552	q25	10	94352760	KIF11	TSS200	Island
cg26202575	LGG	0.546	(0.382;0.783)	0.000971607	0.000835373	0.473	median	10	94351614	KIF11	TSS1500	Island
cg26202575	ACC	2.539	(1.183;5.45)	0.016769552	0.02255072	0.058	q75	10	94351614	KIF11	TSS1500	Island
cg26202575	LUAD	1.371	(0.998;1.883)	0.051422753	0.052698719	0.777302209	mean	10	94351614	KIF11	TSS1500	Island
cg26202575	GBM	0.697	(0.462;1.052)	0.08539805	0.084045217	0.471107204	median	10	94351614	KIF11	TSS1500	Island
cg26202575	COAD	0.67	(0.397;1.13)	0.132735571	0.144400917	0.732	q25	10	94351614	KIF11	TSS1500	Island
cg26202575	BLCA	1.268	(0.892;1.802)	0.186481925	0.177215588	0.763	q25	10	94351614	KIF11	TSS1500	Island
cg26202575	LAML	1.326	(0.855;2.056)	0.207373516	0.196238023	0.08	q25	10	94351614	KIF11	TSS1500	Island
cg26202575	SKCM	1.177	(0.903;1.535)	0.227169683	0.226479264	0.606	median	10	94351614	KIF11	TSS1500	Island
cg26202575	KIRP	0.663	(0.341;1.288)	0.22520064	0.237367756	0.163595009	q25	10	94351614	KIF11	TSS1500	Island
cg26202575	KIRC	0.78	(0.494;1.232)	0.286881796	0.276493782	0.061752634	q75	10	94351614	KIF11	TSS1500	Island
cg26202575	STAD	1.237	(0.837;1.829)	0.286103251	0.276575027	0.926	q25	10	94351614	KIF11	TSS1500	Island
cg26202575	PAAD	0.789	(0.506;1.231)	0.296202235	0.304990012	0.846237778	q25	10	94351614	KIF11	TSS1500	Island
cg26202575	LUSC	0.826	(0.557;1.226)	0.342840069	0.333896614	0.101	q75	10	94351614	KIF11	TSS1500	Island
cg26202575	LIHC	1.218	(0.792;1.872)	0.369281198	0.35998444	0.24	q25	10	94351614	KIF11	TSS1500	Island
cg26202575	HNSC	1.149	(0.848;1.557)	0.369344905	0.374611474	0.960162058	q75	10	94351614	KIF11	TSS1500	Island
cg26202575	UVM	1.436	(0.621;3.324)	0.397654579	0.392701206	0.789	median	10	94351614	KIF11	TSS1500	Island
cg26202575	UCEC	1.234	(0.748;2.035)	0.41110297	0.417857695	0.060533882	q75	10	94351614	KIF11	TSS1500	Island
cg26202575	ESCA	0.831	(0.509;1.357)	0.460113134	0.465801851	0.672	q25	10	94351614	KIF11	TSS1500	Island
cg26202575	READ	1.441	(0.469;4.431)	0.52352131	0.510812825	0.305	q25	10	94351614	KIF11	TSS1500	Island
cg26202575	BRCA	1.135	(0.766;1.683)	0.527227187	0.525954923	0.149	median	10	94351614	KIF11	TSS1500	Island
cg26202575	SARC	1.157	(0.73;1.834)	0.534584842	0.529586548	0.224	q25	10	94351614	KIF11	TSS1500	Island
cg26202575	CESC	0.881	(0.503;1.543)	0.658598694	0.662239301	0.732	q25	10	94351614	KIF11	TSS1500	Island
cg26202575	UCS	1.179	(0.533;2.609)	0.683732603	0.67947807	0.364807996	q25	10	94351614	KIF11	TSS1500	Island
cg26202575	MESO	1.083	(0.664;1.765)	0.750167699	0.750974378	0.019	mean	10	94351614	KIF11	TSS1500	Island
cg26863881	KIRC	0.487	(0.326;0.726)	0.000408242	0.000316732	0.898010574	median	10	94352754	KIF11	TSS200	Island
cg26863881	UCS	0.361	(0.178;0.734)	0.004872951	0.007572307	0.133794753	q25	10	94352754	KIF11	TSS200	Island
cg26863881	UCEC	2.136	(1.149;3.971)	0.016503604	0.009426685	0.906410016	q25	10	94352754	KIF11	TSS200	Island
cg26863881	PAAD	0.65	(0.432;0.976)	0.037663512	0.036982304	0.186674972	median	10	94352754	KIF11	TSS200	Island
cg26863881	LUAD	1.362	(0.992;1.869)	0.055872417	0.055328033	0.468430724	median	10	94352754	KIF11	TSS200	Island
cg26863881	ESCA	0.622	(0.382;1.013)	0.056275632	0.06430182	0.391	q25	10	94352754	KIF11	TSS200	Island
cg26863881	GBM	0.697	(0.455;1.066)	0.096192951	0.092817328	0.453278789	mean	10	94352754	KIF11	TSS200	Island
cg26863881	SKCM	1.276	(0.956;1.704)	0.097947853	0.103750929	0.634	q75	10	94352754	KIF11	TSS200	Island
cg26863881	BLCA	0.801	(0.597;1.074)	0.138549761	0.137946789	0.046	median	10	94352754	KIF11	TSS200	Island
cg26863881	MESO	0.68	(0.393;1.175)	0.167288638	0.15427304	0.151	q75	10	94352754	KIF11	TSS200	Island
cg26863881	ACC	1.672	(0.789;3.545)	0.179927989	0.173257886	0.098	median	10	94352754	KIF11	TSS200	Island
cg26863881	HNSC	1.19	(0.913;1.552)	0.198941299	0.198955614	0.117332839	mean	10	94352754	KIF11	TSS200	Island
cg26863881	CESC	1.292	(0.81;2.061)	0.282103246	0.279905907	0.075	median	10	94352754	KIF11	TSS200	Island
cg26863881	STAD	0.818	(0.569;1.175)	0.277517188	0.285221665	0.276	q25	10	94352754	KIF11	TSS200	Island
cg26863881	KIRP	0.687	(0.348;1.355)	0.278455309	0.291241677	0.12128893	q25	10	94352754	KIF11	TSS200	Island
cg26863881	KICH	0.389	(0.049;3.117)	0.374053656	0.316506927	0.353341012	q75	10	94352754	KIF11	TSS200	Island
cg26863881	UVM	1.543	(0.652;3.653)	0.323608729	0.335563161	0.268	q75	10	94352754	KIF11	TSS200	Island
cg26863881	LGG	0.864	(0.608;1.228)	0.414099668	0.414034187	0.494	median	10	94352754	KIF11	TSS200	Island
cg26863881	LIHC	1.153	(0.819;1.624)	0.415073079	0.414427695	0.728	median	10	94352754	KIF11	TSS200	Island
cg26863881	READ	0.637	(0.22;1.845)	0.405726201	0.420093969	0.675	q25	10	94352754	KIF11	TSS200	Island
cg26863881	LAML	1.184	(0.777;1.805)	0.431078611	0.42479099	0.839	q25	10	94352754	KIF11	TSS200	Island
cg26863881	SARC	0.905	(0.584;1.402)	0.656030195	0.658377794	0.998	q25	10	94352754	KIF11	TSS200	Island
cg26863881	LUSC	0.921	(0.634;1.337)	0.663971751	0.661666796	0.319	q75	10	94352754	KIF11	TSS200	Island
cg26863881	COAD	1.123	(0.655;1.927)	0.67305995	0.67029833	0.28	q25	10	94352754	KIF11	TSS200	Island
cg26863881	BRCA	0.936	(0.635;1.379)	0.737644787	0.737537342	0.519	median	10	94352754	KIF11	TSS200	Island
