# Supplementary material for: KIF11 As a Potential Pan-Cancer Immunological Biomarker Encompassing the Disease Staging, Prognoses, Tumor Microenvironment, and Therapeutic Responses
Source: Oxid Med Cell Longev. 2022 Dec 16;2022:2764940. doi: 10.1155/2022/2764940 (PMC9893523; doi:10.1155/2022/2764940)
Supplement: Supplementary 10 — Supplementary Table 5: the relationship between KIF11 expression and pan-cancer immune cell infiltration analyzed by the TIMER database. [file 2764940.f10.txt]

cancer	variable	partial.cor	p
ACC1	Purity	0.368368423	0.001241205
ACC2	B Cell	0.370382796	0.001257655
ACC3	CD8+ T Cell	-0.077111257	0.516704295
ACC4	CD4+ T Cell	0.012743816	0.914782451
ACC5	Macrophage	-0.038002783	0.749569494
ACC6	Neutrophil	0.124871127	0.292519053
ACC7	Dendritic Cell	0.253322359	0.030584582
BLCA1	Purity	0.078877187	0.13043271
BLCA2	B Cell	-0.036909007	0.483287691
BLCA3	CD8+ T Cell	0.335135631	4.68E-11
BLCA4	CD4+ T Cell	-0.031078186	0.553948165
BLCA5	Macrophage	0.029550472	0.573606894
BLCA6	Neutrophil	0.212923728	4.32E-05
BLCA7	Dendritic Cell	0.314471219	8.05E-10
BRCA1	Purity	0.218202277	3.45E-12
BRCA2	B Cell	0.194216842	9.28E-10
BRCA3	CD8+ T Cell	0.156740689	8.61E-07
BRCA4	CD4+ T Cell	0.059206949	0.066417875
BRCA5	Macrophage	-0.041192664	0.196907961
BRCA6	Neutrophil	0.179923995	2.31E-08
BRCA7	Dendritic Cell	0.146835963	5.44E-06
BRCA-Basal1	Purity	0.164200536	0.062963532
BRCA-Basal2	B Cell	0.08344884	0.356818517
BRCA-Basal3	CD8+ T Cell	0.152698986	0.091771648
BRCA-Basal4	CD4+ T Cell	0.109818002	0.228536168
BRCA-Basal5	Macrophage	-0.062447977	0.485505035
BRCA-Basal6	Neutrophil	0.151513874	0.114089795
BRCA-Basal7	Dendritic Cell	0.09293247	0.3253898
BRCA-Her21	Purity	0.162166918	0.219778246
BRCA-Her22	B Cell	-0.173464357	0.192846463
BRCA-Her23	CD8+ T Cell	0.048354987	0.720947189
BRCA-Her24	CD4+ T Cell	0.133400894	0.318131083
BRCA-Her25	Macrophage	-0.214245044	0.106324486
BRCA-Her26	Neutrophil	0.078659412	0.557255968
BRCA-Her27	Dendritic Cell	-0.035232272	0.796570812
BRCA-Luminal1	Purity	0.268588747	1.78E-10
BRCA-Luminal2	B Cell	0.130541454	0.002347607
BRCA-Luminal3	CD8+ T Cell	0.155531355	0.000297108
BRCA-Luminal4	CD4+ T Cell	0.095612296	0.026863883
BRCA-Luminal5	Macrophage	0.050795492	0.237763074
BRCA-Luminal6	Neutrophil	0.170915792	7.20E-05
BRCA-Luminal7	Dendritic Cell	0.160122972	0.000200001
CESC1	Purity	0.219252702	0.000229487
CESC2	B Cell	-0.030829741	0.609413848
CESC3	CD8+ T Cell	0.073766835	0.223552839
CESC4	CD4+ T Cell	0.159585843	0.007788516
CESC5	Macrophage	-0.135160041	0.024469785
CESC6	Neutrophil	0.141810987	0.018202211
CESC7	Dendritic Cell	0.069628491	0.248949275
CHOL1	Purity	-0.125901137	0.464372294
CHOL2	B Cell	-0.127512828	0.465410348
CHOL3	CD8+ T Cell	0.066796923	0.703017391
CHOL4	CD4+ T Cell	-0.16738008	0.336514809
CHOL5	Macrophage	-0.246635526	0.15320626
CHOL6	Neutrophil	-0.180681148	0.298952131
CHOL7	Dendritic Cell	-0.008537633	0.961177691
COAD1	Purity	0.006199025	0.900779114
COAD2	B Cell	0.260444828	1.09E-07
COAD3	CD8+ T Cell	0.338597284	2.39E-12
COAD4	CD4+ T Cell	0.067687143	0.175592599
COAD5	Macrophage	0.089832088	0.071285228
COAD6	Neutrophil	0.260499554	1.21E-07
COAD7	Dendritic Cell	0.195063841	8.26E-05
DLBC1	Purity	0.221618788	0.158386353
DLBC2	B Cell	0.815353347	3.74E-05
DLBC3	CD8+ T Cell	-0.128136376	0.579901099
DLBC4	CD4+ T Cell	-0.569037518	0.007099886
DLBC5	Macrophage	0.09893405	0.669626442
DLBC6	Neutrophil	0.046973856	0.839767303
DLBC7	Dendritic Cell	0.172072781	0.455762673
ESCA1	Purity	0.300786017	3.88E-05
ESCA2	B Cell	0.127152536	0.089855874
ESCA3	CD8+ T Cell	-0.086606898	0.247668074
ESCA4	CD4+ T Cell	-0.036477336	0.627835372
ESCA5	Macrophage	0.017849454	0.812015943
ESCA6	Neutrophil	-0.060395566	0.420599271
ESCA7	Dendritic Cell	-0.249638489	0.000725947
GBM1	Purity	0.404422305	6.42E-18
GBM2	B Cell	-0.097612017	0.046100571
GBM3	CD8+ T Cell	-0.017507453	0.721169511
GBM4	CD4+ T Cell	0.004205031	0.931692986
GBM5	Macrophage	-0.008485489	0.862675139
GBM6	Neutrophil	0.05836335	0.233777879
GBM7	Dendritic Cell	0.072656588	0.138079805
HNSC1	Purity	0.210094056	2.53E-06
HNSC2	B Cell	0.095927087	0.036420071
HNSC3	CD8+ T Cell	0.178983695	8.92E-05
HNSC4	CD4+ T Cell	0.283961149	2.36E-10
HNSC5	Macrophage	0.129561108	0.004343822
HNSC6	Neutrophil	0.278368254	5.67E-10
HNSC7	Dendritic Cell	0.259154085	7.75E-09
HNSC-HPVpos1	Purity	0.262711477	0.012364464
HNSC-HPVpos2	B Cell	0.302072045	0.00681819
HNSC-HPVpos3	CD8+ T Cell	0.305889868	0.006458604
HNSC-HPVpos4	CD4+ T Cell	0.28161539	0.010374633
HNSC-HPVpos5	Macrophage	0.005760013	0.95802277
HNSC-HPVpos6	Neutrophil	0.239603083	0.027202333
HNSC-HPVpos7	Dendritic Cell	0.297502044	0.006306442
HNSC-HPVneg1	Purity	0.127184994	0.010794326
HNSC-HPVneg2	B Cell	-0.028191659	0.576898052
HNSC-HPVneg3	CD8+ T Cell	0.094038058	0.062543539
HNSC-HPVneg4	CD4+ T Cell	0.267859816	6.45E-08
HNSC-HPVneg5	Macrophage	0.145428842	0.003816991
HNSC-HPVneg6	Neutrophil	0.265101005	1.03E-07
HNSC-HPVneg7	Dendritic Cell	0.225853579	5.65E-06
KICH1	Purity	0.134372919	0.282070204
KICH2	B Cell	0.247285636	0.047038056
KICH3	CD8+ T Cell	0.231862791	0.063100755
KICH4	CD4+ T Cell	0.177401997	0.157435209
KICH5	Macrophage	0.247289394	0.047034596
KICH6	Neutrophil	0.165076017	0.18881325
KICH7	Dendritic Cell	0.360602503	0.003169173
KIRC1	Purity	-0.194261506	2.62E-05
KIRC2	B Cell	0.388768707	5.20E-18
KIRC3	CD8+ T Cell	0.342590111	1.66E-13
KIRC4	CD4+ T Cell	0.254931846	2.94E-08
KIRC5	Macrophage	0.298884679	1.07E-10
KIRC6	Neutrophil	0.444509875	1.33E-23
KIRC7	Dendritic Cell	0.492131947	3.97E-29
KIRP1	Purity	0.172586817	0.005352513
KIRP2	B Cell	0.191333061	0.002106409
KIRP3	CD8+ T Cell	0.072651666	0.244898752
KIRP4	CD4+ T Cell	0.043061567	0.491054836
KIRP5	Macrophage	-0.210011747	0.000854471
KIRP6	Neutrophil	0.228327189	0.000216754
KIRP7	Dendritic Cell	0.159255537	0.010712924
LGG1	Purity	0.27256728	1.32E-09
LGG2	B Cell	0.26002385	7.95E-09
LGG3	CD8+ T Cell	0.21086507	3.31E-06
LGG4	CD4+ T Cell	0.143672104	0.001674358
LGG5	Macrophage	0.176658286	0.000112317
LGG6	Neutrophil	0.156721863	0.000608315
LGG7	Dendritic Cell	0.235114397	2.11E-07
LIHC1	Purity	0.146303553	0.006406047
LIHC2	B Cell	0.474048186	1.13E-20
LIHC3	CD8+ T Cell	0.353578968	1.65E-11
LIHC4	CD4+ T Cell	0.363014738	3.74E-12
LIHC5	Macrophage	0.484717625	1.71E-21
LIHC6	Neutrophil	0.379964949	2.72E-13
LIHC7	Dendritic Cell	0.486934116	1.21E-21
LUAD1	Purity	0.027934643	0.535635438
LUAD2	B Cell	-0.160725436	0.000385346
LUAD3	CD8+ T Cell	0.061136091	0.177996626
LUAD4	CD4+ T Cell	-0.039707201	0.383402933
LUAD5	Macrophage	-0.069267117	0.127672694
LUAD6	Neutrophil	0.111690242	0.014050325
LUAD7	Dendritic Cell	-0.020416751	0.652774592
LUSC1	Purity	0.360594721	4.00E-16
LUSC2	B Cell	-0.107674219	0.019289606
LUSC3	CD8+ T Cell	0.008921633	0.846227529
LUSC4	CD4+ T Cell	0.025835407	0.574334173
LUSC5	Macrophage	-0.197561014	1.38E-05
LUSC6	Neutrophil	-0.070633293	0.123826918
LUSC7	Dendritic Cell	-0.056833109	0.216802296
MESO1	Purity	-0.164916746	0.129164182
MESO2	B Cell	0.305073489	0.004776252
MESO3	CD8+ T Cell	0.087325575	0.429603507
MESO4	CD4+ T Cell	0.268806787	0.013419877
MESO5	Macrophage	0.152832697	0.165162931
MESO6	Neutrophil	-0.257020218	0.018268595
MESO7	Dendritic Cell	0.359400078	0.000786424
OV1	Purity	0.095906286	0.034914644
OV2	B Cell	0.044713975	0.328287577
OV3	CD8+ T Cell	-0.117190636	0.010179136
OV4	CD4+ T Cell	0.07008208	0.125200996
OV5	Macrophage	0.092615027	0.042543514
OV6	Neutrophil	0.049071221	0.28329805
OV7	Dendritic Cell	0.040066774	0.38109415
PAAD1	Purity	0.017400905	0.820762942
PAAD2	B Cell	0.172480887	0.024078697
PAAD3	CD8+ T Cell	0.090729507	0.237930257
PAAD4	CD4+ T Cell	-0.179276383	0.019688937
PAAD5	Macrophage	-0.103742835	0.17691664
PAAD6	Neutrophil	0.046233577	0.548193516
PAAD7	Dendritic Cell	0.149847424	0.050442014
PCPG1	Purity	0.214378004	0.005263835
PCPG2	B Cell	0.147211826	0.057635013
PCPG3	CD8+ T Cell	-0.038843905	0.618207948
PCPG4	CD4+ T Cell	0.04000982	0.607697423
PCPG5	Macrophage	0.150970742	0.052189523
PCPG6	Neutrophil	0.014081347	0.856671128
PCPG7	Dendritic Cell	-0.060375196	0.438300245
PRAD1	Purity	0.17164979	0.000430195
PRAD2	B Cell	0.239634547	8.60E-07
PRAD3	CD8+ T Cell	0.152772904	0.00177832
PRAD4	CD4+ T Cell	0.040632162	0.411320635
PRAD5	Macrophage	0.098653254	0.044326204
PRAD6	Neutrophil	0.11530748	0.01893036
PRAD7	Dendritic Cell	0.144298229	0.003217611
READ1	Purity	-0.076109624	0.371447798
READ2	B Cell	0.063152729	0.460165825
READ3	CD8+ T Cell	0.317711034	0.000138314
READ4	CD4+ T Cell	-0.120162864	0.158830136
READ5	Macrophage	-0.062917606	0.461841112
READ6	Neutrophil	0.209195704	0.013799156
READ7	Dendritic Cell	-0.055235018	0.518393371
SARC1	Purity	0.285837321	5.46E-06
SARC2	B Cell	0.0259625	0.689647455
SARC3	CD8+ T Cell	-0.018653194	0.773736881
SARC4	CD4+ T Cell	-0.099046	0.126775143
SARC5	Macrophage	-0.126889339	0.052056752
SARC6	Neutrophil	0.086412136	0.180308828
SARC7	Dendritic Cell	-0.056402919	0.383344475
SKCM1	Purity	0.058010352	0.215298517
SKCM2	B Cell	0.142993595	0.002415324
SKCM3	CD8+ T Cell	0.354147739	2.18E-14
SKCM4	CD4+ T Cell	0.058807958	0.215147062
SKCM5	Macrophage	0.152598799	0.001121968
SKCM6	Neutrophil	0.428727802	1.24E-21
SKCM7	Dendritic Cell	0.248443536	1.06E-07
SKCM-Primary1	Purity	0.188748393	0.056209353
SKCM-Primary2	B Cell	0.135532039	0.176576808
SKCM-Primary3	CD8+ T Cell	0.446547489	2.86E-06
SKCM-Primary4	CD4+ T Cell	-0.170925752	0.087450642
SKCM-Primary5	Macrophage	0.130130301	0.194618219
SKCM-Primary6	Neutrophil	0.482908289	3.61E-07
SKCM-Primary7	Dendritic Cell	0.16054199	0.108765786
SKCM-Metastasis1	Purity	0.021570179	0.685457596
SKCM-Metastasis2	B Cell	0.081243547	0.131492385
SKCM-Metastasis3	CD8+ T Cell	0.278860119	2.04E-07
SKCM-Metastasis4	CD4+ T Cell	0.054630741	0.31234395
SKCM-Metastasis5	Macrophage	0.092791559	0.082564675
SKCM-Metastasis6	Neutrophil	0.359559422	3.76E-12
SKCM-Metastasis7	Dendritic Cell	0.199167918	0.000200898
STAD1	Purity	0.116084314	0.023629474
STAD2	B Cell	-0.147143204	0.004620418
STAD3	CD8+ T Cell	-0.101418837	0.051264617
STAD4	CD4+ T Cell	-0.266377355	2.31E-07
STAD5	Macrophage	-0.396202631	2.34E-15
STAD6	Neutrophil	-0.068966548	0.185010163
STAD7	Dendritic Cell	-0.180067634	0.000491819
TGCT1	Purity	0.047680589	0.564974451
TGCT2	B Cell	0.241547241	0.003204841
TGCT3	CD8+ T Cell	0.392907657	8.54E-07
TGCT4	CD4+ T Cell	-0.287664094	0.000430409
TGCT5	Macrophage	-0.161240034	0.051053688
TGCT6	Neutrophil	-0.171048311	0.038317906
TGCT7	Dendritic Cell	0.129721633	0.118627382
THCA1	Purity	0.014081644	0.756096574
THCA2	B Cell	0.521754812	5.25E-35
THCA3	CD8+ T Cell	0.143812925	0.001462238
THCA4	CD4+ T Cell	0.350025285	1.64E-15
THCA5	Macrophage	0.358041043	3.32E-16
THCA6	Neutrophil	0.450244751	9.84E-26
THCA7	Dendritic Cell	0.529448096	2.16E-36
THYM1	Purity	-0.173857212	0.061976803
THYM2	B Cell	0.826886631	9.11E-30
THYM3	CD8+ T Cell	0.663459708	8.72E-16
THYM4	CD4+ T Cell	0.741048933	1.42E-20
THYM5	Macrophage	0.597266692	2.31E-12
THYM6	Neutrophil	-0.255130027	0.006153028
THYM7	Dendritic Cell	0.847259321	1.49E-32
UCEC1	Purity	0.013926819	0.81204439
UCEC2	B Cell	-0.180364587	0.0020826
UCEC3	CD8+ T Cell	0.101126798	0.086142486
UCEC4	CD4+ T Cell	-0.169610741	0.003708549
UCEC5	Macrophage	-0.1464871	0.012211652
UCEC6	Neutrophil	0.225919919	9.57E-05
UCEC7	Dendritic Cell	-0.090702255	0.121993032
UCS1	Purity	0.099730932	0.473057508
UCS2	B Cell	0.116771165	0.405019595
UCS3	CD8+ T Cell	-0.055684397	0.692083289
UCS4	CD4+ T Cell	-0.042979111	0.759929878
UCS5	Macrophage	0.079984774	0.569134703
UCS6	Neutrophil	-0.258712099	0.061410824
UCS7	Dendritic Cell	-0.234087277	0.091589067
UVM1	Purity	0.263325909	0.019840171
UVM2	B Cell	0.243626325	0.035180265
UVM3	CD8+ T Cell	0.355020637	0.001533734
UVM4	CD4+ T Cell	-0.383333939	0.000630818
UVM5	Macrophage	-0.277366802	0.026491132
UVM6	Neutrophil	0.052609197	0.649535257
UVM7	Dendritic Cell	0.016977118	0.885842658
