# Supplementary material for: KIF11 As a Potential Pan-Cancer Immunological Biomarker Encompassing the Disease Staging, Prognoses, Tumor Microenvironment, and Therapeutic Responses
Source: Oxid Med Cell Longev. 2022 Dec 16;2022:2764940. doi: 10.1155/2022/2764940 (PMC9893523; doi:10.1155/2022/2764940)
Supplement: Supplementary 11 — Supplementary Table 6: prognostic value of KIF11 expression according to different immune cell subgroups. [file 2764940.f11.txt]

	Basophils enriched		Basophils decreased		B-cells enriched		B-cells decreased		CD4+ memory T-cells enriched		CD4+ memory T-cells decreased		CD8+ T-cells enriched		CD8+ T-cells decreased		Eosinophils enriched		Eosinophils decreased		Macrophages enriched		Macrophages decreased		Mesenchymal stem cells enriched		Mesenchymal stem cells decreased		Natural killer T-cells enriched		Natural killer T-cells decreased		Regulatory T-cells enriched		Regulatory T-cells decreased		Type 1 T-helper cells enriched		Type 1 T-helper cells decreased		Type 2 T-helper cells enriched		Type 2 T-helper cells decreased
Cancer type	HR	logrank P	HR	logrank P	HR	logrank P	HR	logrank P	HR	logrank P	HR	logrank P	HR	logrank P	HR	logrank P	HR	logrank P	HR	logrank P	HR	logrank P	HR	logrank P	HR	logrank P	HR	logrank P	HR	logrank P	HR	logrank P	HR	logrank P	HR	logrank P	HR	logrank P	HR	logrank P	HR	logrank P	HR	logrank P
Bladder Carcinoma (n=405)	1.31	0.3	1.28	0.26	0.73	0.22	1.45	0.06	1.89	0.027	0.7	0.12	1.43	0.095	0.69	0.13	1.18	0.45	1.34	0.3	0.55	0.0098	1.7	0.008	1.4	0.13	2.36	0.0036	0.73	0.18	0.78	0.31	1.53	0.23	1.34	0.18	1.19	0.33	1.29	0.38	0.88	0.46	2.16	0.033
Breast cancer (n=1090)	1.27	0.19	1.91	0.15	1.48	0.094	1.33	0.23	1.33	0.18	1.43	0.19	1.8	0.053	1.29	0.18	1.35	0.32	1.22	0.29	1.31	0.2	1.35	0.24	1.5	0.032	0.68	0.24	1.31	0.3	0.78	0.27	1.7	0.021	0.64	0.076	0.62	0.097	0.74	0.16	0.67	0.1	0.7	0.12
Cervical squamous cell carcinoma (n=304)	0.35	0.00049	0.54	0.15	0.47	0.0067	0.51	0.17	0.46	0.003	2.61	0.2	0.36	0.0027	0.7	0.34	0.13	0.0011	0.69	0.19	0.37	0.019	0.51	0.036	0.58	0.41	0.42	0.0011	0.38	0.18	0.47	0.0092	0.47	0.061	0.6	0.092	0.59	0.04	0.21	0.028	0.53	0.0076	NA	NA
Esophageal Adenocarcinoma (n=80)	NA	NA	2.58	0.0094	2.43	0.045	2.41	0.077	2.26	0.046	2.78	0.09	3.66	0.0029	1.75	0.38	2.62	0.0036	NA	NA	292035898	0.066	2.5	0.018	NA	NA	2.57	0.0082	0.57	0.31	6.87	2.00E-05	3.08	0.0012	NA	NA	0.25	0.07	3.77	0.00023	2.39	0.0084	NA	NA
Esophageal Squamous Cell Carcinoma (n=81)	0.44	0.21	0	0.011	0.23	0.15	0.24	0.046	0	0.036	0.26	0.028	0.14	0.028	0.54	0.27	0.38	0.073	NA	NA	0	0.038	0.35	0.044	0.35	0.16	0.44	0.17	2.86	0.32	0.36	0.057	0.32	0.057	NA	NA	0.37	0.091	0.27	0.075	0.42	0.039	NA	NA
Head-neck squamous cell carcinoma (n=500)	1.42	0.19	1.41	0.14	0.54	0.0088	1.75	0.0093	0.72	0.075	2.14	0.0025	0.67	0.075	1.32	0.2	0.68	0.065	1.58	0.05	1.97	0.01	0.69	0.056	1.76	0.012	0.44	0.004	1.47	0.2	1.21	0.25	0.79	0.26	1.69	0.065	0.79	0.16	2.19	0.022	0.82	0.18	2.4	0.42
Kidney renal clear cell carcinoma (n=530)	2.37	0.00013	1.77	0.005	2.16	2.00E-04	1.8	0.013	2.43	1.10E-06	1.95	0.016	2.07	3.30E-05	2.1	0.02	0.61	0.025	2.78	4.60E-07	2.08	1.50E-05	2.64	0.0077	2.5	0.045	1.81	0.00031	2.41	3.00E-04	2.14	8.60E-05	1.99	0.012	2.02	0.00013	5.2	0.015	1.72	0.00072	2.71	0.0073	1.71	0.0016
Kidney renal papillary cell carcinoma (n=288)	7.98	7.80E-06	4.83	1.60E-05	5.91	8.80E-08	3.43	0.015	30.53	7.20E-11	4.16	2.00E-05	3.66	0.0026	8.38	3.30E-08	3.44	0.0043	14.74	6.60E-10	5.32	3.50E-07	4.58	0.0052	8.79	1.00E-05	6.16	1.10E-07	4.64	3.50E-05	5.4	7.60E-05	5.92	1.00E-04	4.41	2.50E-05	13.75	4.90E-07	4.34	1.00E-05	NA	NA	3.83	1.60E-05
Liver hepatocellular carcinoma?(n=371)	NA	NA	2.14	2.00E-05	3.88	6.00E-04	2.48	2.70E-06	3.46	0.0019	2.44	3.60E-06	2.55	0.0053	2.46	1.10E-05	NA	NA	2.16	1.20E-05	2.34	0.00029	2.7	0.00024	5.83	8.20E-05	1.94	6.00E-04	2.36	1.00E-04	2.21	0.0078	2.32	6.40E-05	2.58	0.0034	2.54	1.30E-05	1.95	0.084	2.34	0.001	1.98	0.005
Lung adenocarcinoma (n=513)	1.71	0.099	2.97	7.20E-05	1.97	0.00039	2.3	0.0023	1.9	0.0011	2.23	0.0031	2.25	0.00022	1.84	0.0071	2.12	0.00013	1.65	0.041	2.18	4.90E-06	1.45	0.37	1.92	0.00024	2.33	0.016	1.64	0.074	2.6	2.00E-05	1.65	0.02	2.63	1.60E-05	1.25	0.36	2.03	0.00011	1.47	0.032	1.63	0.13
Lung squamous cell carcinoma (n=501)	0.79	0.25	0.69	0.075	0.76	0.13	0.63	0.14	0.77	0.11	0.55	0.033	0.65	0.06	0.76	0.12	0.6	0.024	0.74	0.089	0.75	0.12	0.77	0.28	0.73	0.062	0.7	0.12	0.31	0.011	0.75	0.056	0.62	0.018	0.8	0.26	0.82	0.26	0.65	0.089	0.75	0.044	0.26	0.02
Ovarian cancer (n=374)	1.33	0.087	1.54	0.11	0.78	0.18	1.56	0.05	1.27	0.35	1.35	0.075	1.8	0.12	1.28	0.11	2.03	0.016	1.21	0.29	1.35	0.14	1.45	0.076	1.4	0.14	1.42	0.058	1.26	0.23	1.45	0.085	1.85	0.18	1.24	0.16	1.28	0.11	0.59	0.29	1.25	0.15	0.61	0.051
Pancreatic ductal adenocarcinoma (n=177)	NA	NA	2.04	0.00061	2.45	0.02	2.48	3.00E-04	2.52	0.056	2.37	8.00E-04	2.66	0.0072	1.89	0.015	2.25	0.00038	0.45	0.19	2.16	0.0051	15.48	0.00032	2.05	0.00077	4.87	0.056	3.13	0.006	2.16	0.0027	5.91	9.30E-08	1.45	0.17	NA	NA	2.27	9.90E-05	2.15	0.043	1.97	0.032
Pheochromocytoma and Paraganglioma (n=178)	2922009771	0.1	9.62	0.018	NA	NA	12.51	0.0041	NA	NA	12.75	0.0038	9.77	0.017	3084408960	0.097	9.48	0.017	1920268351	0.15	2815157715	0.021	7.98	0.041	9.32	0.019	NA	NA	13.11	0.0033	NA	NA	8.96	0.02	2224134822	0.12	NA	NA	12.45	0.0037	NA	NA	12.79	0.0037
Rectum adenocarcinoma (n=165)	NA	NA	0.51	0.16	0.11	0.029	0.63	0.39	1.7	0.39	NA	NA	19966487694	0.27	0.6	0.32	0.19	0.026	0.3	0.1	0.21	0.061	0.61	0.41	1.74	0.4	0.26	0.061	0.5	0.2	0.37	0.31	0.42	0.33	0.36	0.074	0.34	0.17	0.39	0.14	0.53	0.2	NA	NA
Sarcoma (n=259)	2.53	0.0015	1.84	0.15	1.95	0.22	2.23	0.0025	1.87	0.11	2.42	0.0056	2.08	0.018	2.02	0.049	2.66	0.17	2.23	0.0046	2.16	0.026	2.56	0.0063	2.25	0.0037	1.7	0.14	1.74	0.12	2.69	0.0089	2.89	0.0096	1.84	0.025	1.69	0.055	1.9	0.031	1.97	0.0096	3.44	0.086
Stomach adenocarcinoma (n=375)	0.29	0.003	0.66	0.019	0.48	0.00075	0.69	0.14	0.65	0.065	0.54	0.023	0.63	0.04	0.48	0.0027	0.59	0.0053	0.46	0.019	0.63	0.043	0.49	0.0027	0.54	0.015	0.54	0.0061	0.64	0.033	0.5	0.0092	0.49	0.00019	0.74	0.39	0.45	0.0041	0.61	0.021	0.57	0.001	2.55	0.18
Testicular Germ Cell Tumor (n=134)	0.32	0.39	0	0.09	0.18	0.099	NA	NA	0.2	0.15	NA	NA	0.34	0.42	0	0.056	NA	NA	0.26	0.24	0.26	0.21	NA	NA	0.25	0.22	0	0.094	0.16	0.076	NA	NA	8384291756	0.097	0	0.022	0.15	0.065	NA	NA	0.15	0.055	NA	NA
Thymoma (n=119)	0.06	4.00E-04	NA	NA	0.1	0.00087	NA	NA	0.04	2.20E-05	NA	NA	0.1	0.00095	NA	NA	NA	NA	0.03	1.20E-05	NA	NA	0	0.042	0.25	0.14	0	0.0027	0	0.16	0	6.00E-05	NA	NA	0.1	0.00056	0	0.013	1198026576	0.14	NA	NA	0.09	0.0084
Thyroid carcinoma (n=502)	4.54	0.015	2.49	0.3	3.87	0.21	3.16	0.047	5.51	0.086	2.05	0.23	0.54	0.44	7.99	0.021	2.47	0.4	2.79	0.088	4.54	0.12	3.42	0.073	2155820425	0.008	0.65	0.52	5.51	0.027	2.02	0.3	1.78	0.26	5706652594	0.065	2743592633	0.11	1.84	0.23	NA	NA	2.25	0.098
Uterine corpus endometrial carcinoma (n=543)	0.7	0.37	0.29	0.24	0.37	0.048	4.14	0.041	0.47	0.24	0.31	0.053	2.87	0.3	0.46	0.11	4.94	0.1	0.51	0.086	2.08	0.28	0.31	0.026	0.41	0.13	2.29	0.13	0.37	0.046	0.28	0.072	6.13	0.069	0.29	0.033	0.28	0.028	3289470697	0.062	0.4	0.081	0.39	0.24
