# Supplementary material for: KIF11 As a Potential Pan-Cancer Immunological Biomarker Encompassing the Disease Staging, Prognoses, Tumor Microenvironment, and Therapeutic Responses
Source: Oxid Med Cell Longev. 2022 Dec 16;2022:2764940. doi: 10.1155/2022/2764940 (PMC9893523; doi:10.1155/2022/2764940)
Supplement: Supplementary 12 — Supplementary Table 7: the relationship between drug sensitivity and the expression, methylation, and CNV of KIF11 analyzed by the RNAactDrug database. [file 2764940.f12.txt]

Compound	RNAtype	RNAmolecule	Omics	Source	Pearson.stat	Pearson.fdr	Spearman.stat	Spearman.fdr	Details
(5Z)-7-Oxozeaenol	mRNA	KIF11	Expression	GDSC	0.10264796	0.006619393	-	-
1,1'-biphenyl, 4,4'bis(thiomethyl)-	mRNA	KIF11	Expression	CellMiner	0.4425961	0.01243543	0.467224277	0.018122842
1,2-didemethylcolchicine	mRNA	KIF11	Expression	CellMiner	-	-	0.420276905	0.025866149
1,4-benzenediamine (9ci), n-butyl-n'-phenyl-	mRNA	KIF11	Methylation	CellMiner	-0.43588797	0.01227253	-0.434745288	0.013859676
1-DODECYL-4-NONYLPYRIDINIUM CHLORIDE	mRNA	KIF11	Methylation	CellMiner	-0.37835804	0.036704	-	-
10-(6'-ubiquinolyl)decyltriphenylphosphonium	mRNA	KIF11	Methylation	CellMiner	-	-	-0.377101574	0.038576602
2-[(z)-bromoiodomethylidene] cyclohexanone	mRNA	KIF11	Expression	CellMiner	0.34643166	0.03891934	-	-
3,3?-thiene-2,5-diylbis(5-methoxy-1h-indole)	mRNA	KIF11	Expression	CellMiner	0.35510128	0.04699166	-	-
4-morpholinecarbodithioic acid, antimony complex	mRNA	KIF11	Expression	CellMiner	0.36472283	0.03285769	0.368440795	0.031912957
4-thiomorpholinecarbodithioic acid, antimony complex	mRNA	KIF11	Expression	CellMiner	0.37357809	0.02736472	-	-
5,6-ethylenediquino[3,2-b	mRNA	KIF11	Methylation	CellMiner	-0.3328798	0.02682866	-0.423207969	0.004456056
5-Fluorouracil	mRNA	KIF11	CNV	GDSC	0.06746103	0.04797334	0.078916275	0.020597957
5-Fluorouracil	mRNA	KIF11	Expression	GDSC	-0.10425358	0.003073946	-0.129542708	0.000183994
6-bromo-3-bromomethyl-3,7-dichloro-7-methyl-1-octene	mRNA	KIF11	Expression	CellMiner	0.34590106	0.04609198	-	-
8b-hydroxy-9b,10b-epoxyverrucarin a	mRNA	KIF11	Expression	CellMiner	0.40930878	0.03066022	0.404190286	0.028532731
;1-(6-chloro-1H-benzo[d]imidazol-2-yl)-3-(4-methoxypheny...	mRNA	KIF11	Expression	CellMiner	-0.35261427	0.03934317	-	-
[co(me2dtc)2(dee)]clo4	mRNA	KIF11	Methylation	CellMiner	-	-	-0.514845899	0.003227085
AC1L8IIM	mRNA	KIF11	Methylation	CellMiner	0.3981299	0.04098575	-	-
adoca	mRNA	KIF11	Expression	CellMiner	0.39964406	0.0296895	-	-
Afatinib	mRNA	KIF11	Methylation	GDSC	0.10817364	0.005287816	0.115745845	0.001762346
AICA Ribonucleotide	mRNA	KIF11	Expression	GDSC	-0.17297417	7.95E-07	-0.183136964	1.66E-07
AICA Ribonucleotide	mRNA	KIF11	Methylation	GDSC	0.11035991	0.00280925	0.128089423	0.000565368
AKT inhibitor VIII	mRNA	KIF11	CNV	GDSC	-	-	0.075154596	0.045266749
AKT inhibitor VIII	mRNA	KIF11	Expression	GDSC	-0.11711547	0.000988343	-0.129310098	0.000243372
AKT inhibitor VIII	mRNA	KIF11	Methylation	GDSC	-	-	0.081608618	0.036318748
Alectinib	mRNA	KIF11	Expression	GDSC	-0.11899011	0.000949846	-0.173869763	4.59E-07
Amuvatinib	mRNA	KIF11	Expression	GDSC	-0.1153806	0.001269744	-0.159629024	3.16E-06
andrastin a	mRNA	KIF11	Expression	CellMiner	0.34327381	0.0471968	-	-
antineoplastic-131513	mRNA	KIF11	Methylation	CellMiner	-	-	-0.336399256	0.030885252
aplasmomycin	mRNA	KIF11	Expression	CellMiner	-	-	0.439704885	0.036331367
AR-42	mRNA	KIF11	CNV	GDSC	-	-	0.09278552	0.010432137
AR-42	mRNA	KIF11	Expression	GDSC	-0.11662675	0.001011699	-0.157447927	4.79E-06
AS605240	mRNA	KIF11	Expression	GDSC	-	-	-0.07514872	0.048405574
AS605240	mRNA	KIF11	Methylation	GDSC	0.09111009	0.02269454	0.116398756	0.003270529
AT-7519	mRNA	KIF11	Expression	GDSC	-0.14768085	2.00E-05	-0.171237087	6.25E-07
Avagacestat	mRNA	KIF11	Expression	GDSC	-0.10061962	0.008692759	-0.082069729	0.037553071
Axitinib	mRNA	KIF11	Expression	GDSC	-0.14804759	4.12E-05	-0.154532951	2.08E-05
Axitinib	mRNA	KIF11	Methylation	GDSC	-	-	-0.152070762	6.42E-05
AZD7762	mRNA	KIF11	Expression	GDSC	-0.1676423	2.50E-06	-0.191119272	7.72E-08
AZD8055	mRNA	KIF11	Expression	GDSC	-0.11994131	0.000884618	-0.085583425	0.020539032
baccharin	mRNA	KIF11	Expression	CellMiner	0.44276863	0.01715487	0.436175685	0.018165581
baccharinoid a-1 (busam)	mRNA	KIF11	Expression	CellMiner	0.48568878	0.0208997	0.491760915	0.008050869
baccharinol	mRNA	KIF11	Expression	CellMiner	-	-	0.39413645	0.044873968
BAY-61-3606	mRNA	KIF11	Expression	GDSC	-0.08402962	0.0249191	-0.098014165	0.008055408
Belinostat	mRNA	KIF11	CNV	GDSC	-	-	0.093514849	0.013562597
Belinostat	mRNA	KIF11	Expression	GDSC	-0.09549631	0.009184352	-0.146721254	2.60E-05
Benzethonium Chloride	mRNA	KIF11	Methylation	CellMiner	-	-	-0.329452303	0.033017171
benzo[1,2-b:4,3-b']dithiophene-4,8-dione, 3,7-bis(acetyl)-	mRNA	KIF11	Expression	CellMiner	-	-	0.419998062	0.036680562
berberine chloride	mRNA	KIF11	Methylation	CellMiner	-0.3561137	0.03616119	-	-
BIX02189	mRNA	KIF11	CNV	GDSC	0.08568936	0.01093423	0.101704375	0.002444368
BIX02189	mRNA	KIF11	Expression	GDSC	-0.17846899	1.47E-07	-0.200329887	3.47E-09
Bleomycin (50 uM)	mRNA	KIF11	Expression	GDSC	0.08731173	0.0163354	0.082441755	0.022056749
Bleomycin (50 uM)	mRNA	KIF11	Methylation	GDSC	-	-	-0.113533465	0.003345217
BMS-345541	mRNA	KIF11	CNV	GDSC	-	-	0.093383169	0.007931367
BMS-345541	mRNA	KIF11	Expression	GDSC	-0.17132719	5.03E-07	-0.165877738	9.96E-07
Bosutinib	mRNA	KIF11	Expression	GDSC	-0.08931465	0.02351419	-0.116811035	0.002925846
BX-912	mRNA	KIF11	CNV	GDSC	0.09289413	0.007493827	0.120005561	0.000595891
BX-912	mRNA	KIF11	Expression	GDSC	-0.21440928	1.72E-10	-0.230324763	6.97E-12
BX-912	mRNA	KIF11	Methylation	GDSC	-0.07364973	0.04244499	-0.098836037	0.006614181
BX795	mRNA	KIF11	Expression	GDSC	-0.14931543	4.80E-05	-0.135775592	0.000273564
BX795	mRNA	KIF11	Methylation	GDSC	-	-	-0.122361781	0.001731208
Cabozantinib	mRNA	KIF11	Expression	GDSC	-0.11586151	0.001838199	-0.13616203	0.000271733
Cabozantinib	mRNA	KIF11	Methylation	GDSC	-	-	-0.094057855	0.015360811
CAY10603	mRNA	KIF11	CNV	GDSC	-	-	0.111094719	0.001723241
CAY10603	mRNA	KIF11	Expression	GDSC	-0.11517494	0.001176826	-0.170676702	6.31E-07
CAY10603	mRNA	KIF11	Methylation	GDSC	-	-	-0.096149369	0.009815302
CHIR-99021	mRNA	KIF11	Methylation	GDSC	-	-	-0.112221971	0.004327526
CI-1040	mRNA	KIF11	Expression	GDSC	0.09863849	0.01062602	0.086210177	0.029649433
CI-1040	mRNA	KIF11	Methylation	GDSC	0.12796575	0.00100301	0.114683968	0.003740059
cirensenoxide g	mRNA	KIF11	Expression	CellMiner	0.37662288	0.02292474	-	-
cis-dichlorobis(4-methoxyphenethylamine)platinum(ii)	mRNA	KIF11	Methylation	CellMiner	-0.3989611	0.02689184	-0.399699893	0.021694174
Cisplatin	mRNA	KIF11	Methylation	GDSC	-	-	-0.131839613	0.001446932
colistimethate sodium (usan)	mRNA	KIF11	Expression	CellMiner	-	-	0.443910452	0.033585567
CP466722	mRNA	KIF11	CNV	GDSC	-	-	0.070637978	0.043630422
CP466722	mRNA	KIF11	Expression	GDSC	-0.19067757	2.37E-08	-0.201566994	3.24E-09
CP724714	mRNA	KIF11	Expression	GDSC	-	-	-0.103481435	0.005705648
crassin cinnamate	mRNA	KIF11	Expression	CellMiner	0.3857315	0.01933316	-	-
CUDC-101	mRNA	KIF11	CNV	GDSC	-	-	0.098166444	0.010736797
CUDC-101	mRNA	KIF11	Expression	GDSC	-0.10277336	0.004604224	-0.150286996	1.84E-05
curromycin a.b mixture	mRNA	KIF11	Methylation	CellMiner	-	-	-0.395470339	0.017364853
CX-5461	mRNA	KIF11	CNV	GDSC	-	-	0.084693701	0.011891395
CX-5461	mRNA	KIF11	Expression	GDSC	-0.17591679	2.67E-07	-0.182805021	8.73E-08
CX-5461	mRNA	KIF11	Methylation	GDSC	-0.08479113	0.02072801	-	-
Dabrafenib	mRNA	KIF11	Expression	GDSC	0.09551373	0.01255981	-	-
Dacinostat	mRNA	KIF11	Expression	GDSC	-	-	-0.095358436	0.009754194
Dacinostat	mRNA	KIF11	Methylation	GDSC	-	-	0.090464445	0.022840982
Daporinad	mRNA	KIF11	CNV	GDSC	0.07665435	0.02319372	0.088853706	0.007878157
Daporinad	mRNA	KIF11	Expression	GDSC	-0.17317954	4.19E-07	-0.205622135	1.11E-09
Daporinad	mRNA	KIF11	Methylation	GDSC	-	-	-0.075066063	0.047234213
dequalinium chloride	mRNA	KIF11	Methylation	CellMiner	-	-	-0.405313031	0.019456174
DMOG	mRNA	KIF11	Expression	GDSC	-0.08444214	0.03867342	-0.11014917	0.007119252
Elesclomol	mRNA	KIF11	Methylation	GDSC	-	-	-0.13715356	0.000772318
emetine	mRNA	KIF11	Expression	CellMiner	-	-	0.470169785	0.022882861
Enzastaurin	mRNA	KIF11	Expression	GDSC	-0.08695454	0.02548143	-0.084474893	0.028047842
Enzastaurin	mRNA	KIF11	Methylation	GDSC	-	-	0.097246772	0.011796898
ethoxytris(2-methyl-8-chinolineolato)titanium(iv)	mRNA	KIF11	Expression	CellMiner	-	-	0.387361199	0.040152474
Etoposide	mRNA	KIF11	Expression	GDSC	-0.12679992	0.001203285	-0.139000411	0.000430785
Fedratinib	mRNA	KIF11	CNV	GDSC	-	-	0.084904082	0.019174138
Fedratinib	mRNA	KIF11	Expression	GDSC	-0.17894312	1.63E-07	-0.189692396	2.75E-08
FH535	mRNA	KIF11	Methylation	GDSC	-	-	0.09630673	0.034530582
Foretinib	mRNA	KIF11	Expression	GDSC	-0.13105506	0.000374668	-0.164446874	7.69E-06
Foretinib	mRNA	KIF11	Methylation	GDSC	-0.08977536	0.02150652	-0.137133743	0.000273136
FR-180204	mRNA	KIF11	Expression	GDSC	-0.10328757	0.004095677	-0.136532884	0.00011489
fusarubin	mRNA	KIF11	Methylation	CellMiner	-0.4533504	0.04273141	-	-
g-tpp	mRNA	KIF11	Methylation	CellMiner	-	-	-0.309079542	0.048825634
Gefitinib	mRNA	KIF11	Methylation	GDSC	-	-	0.087898054	0.039976109
Gemcitabine	mRNA	KIF11	Expression	GDSC	-0.09095345	0.03369572	-0.092487089	0.034532948
Genentech Cpd 10	mRNA	KIF11	CNV	GDSC	0.07215009	0.04346534	0.090520461	0.00975612
Genentech Cpd 10	mRNA	KIF11	Expression	GDSC	-0.17260693	5.62E-07	-0.17898184	2.29E-07
gramicidin	mRNA	KIF11	Methylation	CellMiner	-	-	-0.365587245	0.031522602
GSK1070916	mRNA	KIF11	CNV	GDSC	0.1102748	0.001830824	0.132088416	0.000138663
GSK1070916	mRNA	KIF11	Expression	GDSC	-0.2259597	1.48E-11	-0.228364491	9.89E-12
gsk237701a	mRNA	KIF11	Expression	CellMiner	-	-	0.386527537	0.048589575
GSK269962A	mRNA	KIF11	Methylation	GDSC	-	-	-0.091942639	0.023498097
GSK429286A	mRNA	KIF11	CNV	GDSC	-	-	0.099403014	0.004566358
GSK429286A	mRNA	KIF11	Expression	GDSC	-0.1977985	4.95E-09	-0.212185238	2.85E-10
gsk571989a	mRNA	KIF11	Expression	CellMiner	-	-	0.394887115	0.049632032
GSK690693	mRNA	KIF11	CNV	GDSC	-	-	0.106415239	0.003328308
GSK690693	mRNA	KIF11	Expression	GDSC	-0.1946379	1.01E-08	-0.20002431	4.40E-09
GW-2580	mRNA	KIF11	Expression	GDSC	-0.142342	6.51E-05	-0.163889937	2.55E-06
I-BET-762	mRNA	KIF11	CNV	GDSC	0.08698105	0.01868948	0.114045779	0.001770477
I-BET-762	mRNA	KIF11	Expression	GDSC	-0.1727316	3.12E-07	-0.172264114	3.64E-07
Idelalisib	mRNA	KIF11	Expression	GDSC	-0.1609035	3.20E-06	-0.169373552	1.28E-06
insariotoxin	mRNA	KIF11	Expression	CellMiner	-	-	0.395681954	0.046638933
IOX2	mRNA	KIF11	Expression	GDSC	-0.09697752	0.0211123	-0.109414744	0.004245244
IPA-3	mRNA	KIF11	Expression	GDSC	-0.1050793	0.003720566	-0.104257528	0.004172025
Irinotecan	mRNA	KIF11	Expression	CCLE	-	-	-0.393926228	9.21E-10
Ispinesib Mesylate	mRNA	KIF11	CNV	GDSC	0.1080358	0.001846423	0.124030409	0.000257604
Ispinesib Mesylate	mRNA	KIF11	Expression	GDSC	-0.1243823	0.000373721	-0.161138111	2.83E-06
janus red	mRNA	KIF11	Methylation	CellMiner	-	-	-0.333231446	0.047384963
JQ1	mRNA	KIF11	Expression	GDSC	-0.075196	0.04475602	-0.081081489	0.0301975
JW-7-24-1	mRNA	KIF11	CNV	GDSC	-	-	0.078391951	0.032817247
JW-7-24-1	mRNA	KIF11	Expression	GDSC	-0.1556434	6.70E-06	-0.170245635	7.19E-07
JW-7-24-1	mRNA	KIF11	Methylation	GDSC	-	-	-0.07468571	0.045144487
KIN001-236	mRNA	KIF11	CNV	GDSC	-	-	0.070403544	0.047833792
KIN001-236	mRNA	KIF11	Expression	GDSC	-0.1678161	7.53E-07	-0.179515854	1.19E-07
KIN001-244	mRNA	KIF11	CNV	GDSC	0.1089375	0.00170067	0.114306426	0.001042519
KIN001-244	mRNA	KIF11	Expression	GDSC	-0.1445709	3.09E-05	-0.165039137	1.68E-06
KIN001-260	mRNA	KIF11	CNV	GDSC	0.1066264	0.002043154	0.123026013	0.000331688
KIN001-260	mRNA	KIF11	Expression	GDSC	-0.1714378	3.60E-07	-0.208971342	3.94E-10
KIN001-266	mRNA	KIF11	Expression	GDSC	-0.09174661	0.01409517	-0.100946868	0.005347648
KIN001-270	mRNA	KIF11	CNV	GDSC	0.07001613	0.0477703	0.080500321	0.02058739
KIN001-270	mRNA	KIF11	Expression	GDSC	-0.1882247	2.79E-08	-0.191242971	1.74E-08
KIN001-270	mRNA	KIF11	Methylation	GDSC	-0.09990346	0.005867725	-	-
KU-55933	mRNA	KIF11	Expression	GDSC	-0.1469653	4.48E-05	-0.135003904	0.000246727
L-685458	mRNA	KIF11	Expression	CCLE	-	-	-0.153280155	0.023736742
Lenalidomide	mRNA	KIF11	Expression	GDSC	-0.2032276	3.37E-09	-0.187570847	5.87E-08
Lestaurtinib	mRNA	KIF11	Expression	GDSC	-0.1267406	0.000507563	-0.123219614	0.000749704
Linifanib	mRNA	KIF11	Expression	GDSC	-0.1008176	0.0059777	-0.124137739	0.000542069
Masitinib	mRNA	KIF11	CNV	GDSC	0.08323943	0.01725811	0.102892859	0.003279395
Masitinib	mRNA	KIF11	Expression	GDSC	-0.1497791	1.46E-05	-0.159083847	3.52E-06
melicopidine	mRNA	KIF11	Expression	CellMiner	0.3712775	0.04663344	0.413788314	0.020790537
Methotrexate	mRNA	KIF11	CNV	GDSC	0.09341338	0.008124636	0.077423212	0.032206126
Methotrexate	mRNA	KIF11	Expression	GDSC	-0.1648108	1.16E-06	-0.151334392	9.40E-06
methylbenzethonium chloride (usan)	mRNA	KIF11	Methylation	CellMiner	-	-	-0.441022807	0.026088963
mikamycin, b grade	mRNA	KIF11	Expression	CellMiner	0.3658293	0.0391372	-	-
MK-2206	mRNA	KIF11	Expression	GDSC	-0.1090065	0.01306668	-	-
Motesanib	mRNA	KIF11	Methylation	GDSC	-	-	-0.113208168	0.039977241
MPS-1-IN-1	mRNA	KIF11	Expression	GDSC	-0.1470168	2.21E-05	-0.183644363	7.28E-08
n1-(4-hydroxy-1,2-butadien-1-yl)-cytosine (cytallene)	mRNA	KIF11	Expression	CellMiner	0.3478468	0.04658726	-	-
nabor orange r	mRNA	KIF11	Methylation	CellMiner	-0.3447973	0.03319122	-	-
Navitoclax	mRNA	KIF11	CNV	GDSC	0.1434113	3.92E-05	0.165441139	2.05E-06
Navitoclax	mRNA	KIF11	Expression	GDSC	-0.2319954	4.36E-12	-0.213962054	3.77E-10
NG-25	mRNA	KIF11	CNV	GDSC	0.09439658	0.004982045	0.106589667	0.001608997
NG-25	mRNA	KIF11	Expression	GDSC	-0.1449643	2.46E-05	-0.170361595	6.75E-07
nonactin	mRNA	KIF11	Methylation	CellMiner	-	-	-0.360973714	0.048066964
NPK76-II-72-1	mRNA	KIF11	CNV	GDSC	0.118777	0.000944377	0.127409239	0.000327769
NPK76-II-72-1	mRNA	KIF11	Expression	GDSC	-0.2330604	2.37E-12	-0.25859134	5.35E-15
NSC-207895	mRNA	KIF11	CNV	GDSC	-	-	0.080026749	0.032310081
NSC-207895	mRNA	KIF11	Expression	GDSC	-0.1829664	2.22E-07	-0.200321838	1.16E-08
NSC-207895	mRNA	KIF11	Methylation	GDSC	-0.07860104	0.04869958	-0.098293561	0.011640407
NU7441	mRNA	KIF11	Expression	GDSC	-0.09440194	0.01625866	-	-
NVP-BHG712	mRNA	KIF11	CNV	GDSC	0.0710067	0.03883451	0.080386208	0.020525334
NVP-BHG712	mRNA	KIF11	Expression	GDSC	-0.1042407	0.002924597	-0.122532081	0.000433069
Obatoclax Mesylate	mRNA	KIF11	Methylation	GDSC	-	-	0.092180415	0.019801528
Olaparib	mRNA	KIF11	Expression	GDSC	-0.09058306	0.01824754	-0.114705569	0.00224895
Olaparib	mRNA	KIF11	Methylation	GDSC	-0.08582337	0.03599385	-0.101566701	0.012037741
Omipalisib	mRNA	KIF11	Expression	GDSC	-0.1216502	0.000835922	-0.115703234	0.001754242
OSI-027	mRNA	KIF11	CNV	GDSC	-	-	0.087627351	0.014718845
OSI-027	mRNA	KIF11	Expression	GDSC	-0.1508646	1.46E-05	-0.165613534	1.62E-06
OSI-930	mRNA	KIF11	Expression	GDSC	-0.1404346	4.24E-05	-0.155417022	5.35E-06
OSU-03012	mRNA	KIF11	Expression	GDSC	-	-	-0.082679747	0.041357407
PAC-1	mRNA	KIF11	Expression	GDSC	-0.1176227	0.000972996	-0.115414919	0.001209414
Paclitaxel	mRNA	KIF11	Expression	CCLE	-	-	-0.224020452	0.002361249
Panobinostat	mRNA	KIF11	Expression	CCLE	-	-	-0.167615953	0.011332203
PD-0332991	mRNA	KIF11	Expression	CCLE	-0.1897083	0.00698434	-0.172499705	0.011153278
PD0325901	mRNA	KIF11	Expression	GDSC	0.1791503	2.44E-07	0.199565406	5.84E-09
PD0325901	mRNA	KIF11	Methylation	GDSC	0.132616	0.000344107	0.080681609	0.037739446
PD173074	mRNA	KIF11	Expression	GDSC	-0.1312448	0.000378377	-0.135800874	0.000181175
Pelitinib	mRNA	KIF11	Expression	GDSC	-0.09253754	0.01361092	-0.118769307	0.001206513
pentamidine isethionate	mRNA	KIF11	Methylation	CellMiner	-	-	-0.361810023	0.039464022
PF2341066	mRNA	KIF11	Expression	CCLE	-0.1938233	0.006407275	-0.197206041	0.004058421
PFI-3	mRNA	KIF11	Expression	GDSC	-0.1479143	2.24E-05	-0.169099353	8.71E-07
PHA-665752	mRNA	KIF11	Methylation	CCLE	-0.194445	0.02421601	-	-
PHA-793887	mRNA	KIF11	CNV	GDSC	0.08337378	0.01888186	0.089123136	0.012564445
PHA-793887	mRNA	KIF11	Expression	GDSC	-0.1572853	4.01E-06	-0.169930879	5.81E-07
phenazine di-n-oxide	mRNA	KIF11	Expression	CellMiner	0.3945547	0.01878614	-	-
Phenformin	mRNA	KIF11	Expression	GDSC	-0.07980312	0.02973472	-0.104038691	0.003623836
Phenformin	mRNA	KIF11	Methylation	GDSC	0.101312	0.007437588	0.146111443	9.79E-05
PI-103	mRNA	KIF11	CNV	GDSC	-	-	0.08785604	0.022358965
PI-103	mRNA	KIF11	Expression	GDSC	-0.1368356	8.70E-05	-0.143613631	3.61E-05
PIK-93	mRNA	KIF11	CNV	GDSC	0.08323357	0.02894112	0.102430633	0.006354062
PIK-93	mRNA	KIF11	Expression	GDSC	-0.183747	5.94E-08	-0.197555882	5.85E-09
piperidinium, 1,1-didodecyl-3-methyl-, bromide	mRNA	KIF11	Methylation	CellMiner	-0.3976885	0.03285476	-	-
Ponatinib	mRNA	KIF11	Expression	GDSC	-0.1221658	0.000737283	-0.133541584	0.000372825
QL-X-138	mRNA	KIF11	CNV	GDSC	-	-	0.103662088	0.004922286
QL-X-138	mRNA	KIF11	Expression	GDSC	-0.1633147	2.51E-06	-0.165946875	1.76E-06
QL-X-138	mRNA	KIF11	Methylation	GDSC	-0.08988166	0.0138582	-0.09010239	0.014633275
QL-XI-92	mRNA	KIF11	CNV	GDSC	0.08412094	0.01459848	0.094019623	0.006937345
QL-XI-92	mRNA	KIF11	Expression	GDSC	-0.1996691	3.34E-09	-0.204945265	1.45E-09
QL-XII-47	mRNA	KIF11	Expression	GDSC	-0.1191984	0.00127031	-0.118650941	0.001190287
QS11	mRNA	KIF11	Expression	GDSC	-0.1192579	0.00144299	-0.120100525	0.001281192
Quizartinib	mRNA	KIF11	CNV	GDSC	0.08056792	0.03213912	0.103139319	0.005577932
Quizartinib	mRNA	KIF11	Expression	GDSC	-0.139911	5.26E-05	-0.159701955	2.61E-06
Refametinib	mRNA	KIF11	CNV	GDSC	-	-	-0.106932603	0.029621414
Refametinib	mRNA	KIF11	Expression	GDSC	0.2119012	4.62E-10	0.214433853	2.36E-10
Refametinib	mRNA	KIF11	Methylation	GDSC	0.1346061	0.000219568	0.105172727	0.004568795
rhodium dimer	mRNA	KIF11	Methylation	CellMiner	-0.3735861	0.03193867	-0.366306785	0.034811845
Rucaparib	mRNA	KIF11	Methylation	GDSC	-0.09195958	0.04643268	-	-
Ruxolitinib	mRNA	KIF11	Expression	GDSC	-0.1405283	4.91E-05	-0.167640477	8.78E-07
SB505124	mRNA	KIF11	CNV	GDSC	0.07194441	0.03649365	-	-
SB505124	mRNA	KIF11	Expression	GDSC	-	-	-0.108389237	0.002981731
SB52334	mRNA	KIF11	CNV	GDSC	0.1023248	0.008815939	0.132957785	0.000280094
SB52334	mRNA	KIF11	Expression	GDSC	-0.07799745	0.03575143	-0.123919036	0.000468918
SB52334	mRNA	KIF11	Methylation	GDSC	-0.1396452	0.000241352	-	-
Selisistat	mRNA	KIF11	Expression	GDSC	-0.1633544	2.21E-06	-0.174309846	3.32E-07
Selumetinib	mRNA	KIF11	Expression	GDSC	0.2055146	2.79E-09	0.180124133	2.03E-07
Selumetinib	mRNA	KIF11	Methylation	GDSC	0.1255969	0.000821704	0.15062516	4.48E-05
sempervirine, nitrate, dihydrate	mRNA	KIF11	Expression	CellMiner	-	-	0.427309104	0.016421855
SGC0946	mRNA	KIF11	Expression	GDSC	-0.1216939	0.000616519	-0.1359172	0.000103618
shikoccin	mRNA	KIF11	Expression	CellMiner	0.345177	0.0495918	-	-
SL0101	mRNA	KIF11	Expression	GDSC	-0.08551879	0.02456944	-0.090115253	0.017482129
SN-38	mRNA	KIF11	Expression	GDSC	-0.0815495	0.03879763	-0.088019169	0.025794705
SN-38	mRNA	KIF11	Methylation	GDSC	-	-	-0.111747019	0.003309938
SNX-2112	mRNA	KIF11	Expression	GDSC	-0.1423737	4.62E-05	-0.180752422	1.39E-07
Sorafenib	mRNA	KIF11	Expression	CCLE	-	-	-0.178371928	0.013660517
STF-62247	mRNA	KIF11	Expression	GDSC	-0.1680002	8.88E-07	-0.180185283	1.23E-07
suavedol	mRNA	KIF11	Expression	CellMiner	0.4016261	0.04852154	-	-
T0901317	mRNA	KIF11	CNV	GDSC	-	-	0.076714786	0.022627329
T0901317	mRNA	KIF11	Expression	GDSC	-0.1878574	2.48E-08	-0.184368921	4.20E-08
TAK-715	mRNA	KIF11	CNV	GDSC	-	-	0.07494657	0.023786224
TAK-715	mRNA	KIF11	Expression	GDSC	-0.1463491	1.79E-05	-0.168640184	5.97E-07
Talazoparib	mRNA	KIF11	Methylation	GDSC	-0.1063731	0.01098904	-0.128893372	0.001499089
Tamoxifen	mRNA	KIF11	Expression	GDSC	-0.1192722	0.000827339	-0.142869938	4.79E-05
Tanespimycin	mRNA	KIF11	CNV	GDSC	-	-	-0.107889387	0.004722012
Tanespimycin	mRNA	KIF11	Expression	GDSC	0.1701551	6.88E-07	0.186396364	4.15E-08
Temozolomide	mRNA	KIF11	Expression	GDSC	-0.1043667	0.003463629	-0.15633574	6.66E-06
Temsirolimus	mRNA	KIF11	Expression	GDSC	-0.0833048	0.03877705	-	-
thioperoxydicarbonic diamide, tetramethyl-	mRNA	KIF11	Expression	CellMiner	-	-	0.35694933	0.035184896
THZ-2-102-1	mRNA	KIF11	CNV	GDSC	0.1152455	0.00154077	0.130103315	0.000301657
THZ-2-102-1	mRNA	KIF11	Expression	GDSC	-0.1462295	2.57E-05	-0.178831935	1.62E-07
THZ-2-49	mRNA	KIF11	Expression	GDSC	-	-	-0.077829036	0.031375618
Tivozanib	mRNA	KIF11	CNV	GDSC	0.06828442	0.04756166	0.10294072	0.002408966
Tivozanib	mRNA	KIF11	Expression	GDSC	-0.1761648	2.65E-07	-0.191724676	1.50E-08
TKI258	mRNA	KIF11	Expression	CCLE	-0.2740079	5.98E-05	-0.286658296	1.74E-05
TL-1-85	mRNA	KIF11	CNV	GDSC	0.08004648	0.01892872	0.086565332	0.011038902
TL-1-85	mRNA	KIF11	Expression	GDSC	-0.154233	6.40E-06	-0.182957026	7.27E-08
TL-2-105	mRNA	KIF11	CNV	GDSC	0.08356161	0.02378958	0.109497196	0.002186372
TL-2-105	mRNA	KIF11	Expression	GDSC	-0.1714089	4.18E-07	-0.186213528	3.16E-08
Topotecan	mRNA	KIF11	Expression	CCLE	-0.2329658	0.005285875	-0.400234704	3.94E-10
TPCA-1	mRNA	KIF11	CNV	GDSC	0.0926423	0.006504101	0.115548449	0.000786616
TPCA-1	mRNA	KIF11	Expression	GDSC	-0.1818151	8.32E-08	-0.206635445	9.28E-10
Trametinib	mRNA	KIF11	CNV	GDSC	-0.102401	0.02461376	-0.116549894	0.009959983
Trametinib	mRNA	KIF11	Expression	GDSC	0.256412	2.12E-14	0.256278143	1.60E-14
Trametinib	mRNA	KIF11	Methylation	GDSC	0.1454289	5.92E-05	0.095364894	0.010956854
Tretinoin	mRNA	KIF11	CNV	GDSC	0.08073462	0.02776253	-	-
Tretinoin	mRNA	KIF11	Expression	GDSC	-0.1262451	0.000406041	-0.127175449	0.000439888
Tubastatin A	mRNA	KIF11	CNV	GDSC	0.0780305	0.03105974	0.09639652	0.006842242
Tubastatin A	mRNA	KIF11	Expression	GDSC	-0.1587946	2.81E-06	-0.161319267	1.92E-06
TW 37	mRNA	KIF11	Expression	GDSC	-0.08492961	0.04200349	-	-
Tyrothricin	mRNA	KIF11	Methylation	CellMiner	-	-	-0.426582563	0.011137449
UNC0638	mRNA	KIF11	CNV	GDSC	-	-	0.089465123	0.038136075
UNC0638	mRNA	KIF11	Expression	GDSC	-0.1191826	0.000680864	-0.135913216	8.47E-05
UNC1215	mRNA	KIF11	Expression	GDSC	-0.1391734	5.49E-05	-0.14297367	3.20E-05
Veliparib	mRNA	KIF11	Expression	GDSC	-0.1527376	2.06E-05	-0.15137844	2.20E-05
Vinblastine	mRNA	KIF11	Expression	GDSC	-	-	-0.084767295	0.035534411
Vismodegib	mRNA	KIF11	Expression	GDSC	-0.126605	0.00036853	-0.12742099	0.00036017
VNLG/124	mRNA	KIF11	Expression	GDSC	-0.1400868	4.57E-05	-0.16175434	2.15E-06
Vorinostat	mRNA	KIF11	Expression	GDSC	-0.2227443	3.71E-11	-0.208448349	5.21E-10
VX-11e	mRNA	KIF11	Methylation	GDSC	0.08982739	0.02576163	0.084012934	0.037559501
VX-702	mRNA	KIF11	CNV	GDSC	0.08368537	0.01265681	0.084679137	0.01132436
VX-702	mRNA	KIF11	Expression	GDSC	-0.1441217	3.59E-05	-0.140424849	5.40E-05
WHI-P97	mRNA	KIF11	Expression	GDSC	-	-	-0.1142765	0.002579027
WZ3105	mRNA	KIF11	CNV	GDSC	0.1055674	0.009980729	0.117001166	0.003697229
WZ3105	mRNA	KIF11	Expression	GDSC	-0.1074262	0.002279437	-0.127823003	0.000221951
XMD13-2	mRNA	KIF11	CNV	GDSC	0.09071882	0.01057852	0.101140773	0.004511861
XMD13-2	mRNA	KIF11	Expression	GDSC	-0.1704302	5.13E-07	-0.191078629	1.55E-08
XMD14-99	mRNA	KIF11	CNV	GDSC	0.09427273	0.006370592	0.109700823	0.001369392
XMD14-99	mRNA	KIF11	Expression	GDSC	-0.1554391	4.76E-06	-0.174066209	2.75E-07
XMD15-27	mRNA	KIF11	Expression	GDSC	-0.1672423	1.04E-06	-0.156928854	5.03E-06
Y-39983	mRNA	KIF11	CNV	GDSC	-	-	0.07069394	0.042995142
Y-39983	mRNA	KIF11	Expression	GDSC	-0.2009245	3.02E-09	-0.222522921	5.02E-11
Y-39983	mRNA	KIF11	Methylation	GDSC	-	-	-0.07510991	0.047397581
YM201636	mRNA	KIF11	CNV	GDSC	0.1091968	0.00186198	0.118493971	0.000606071
YM201636	mRNA	KIF11	Expression	GDSC	-0.1434959	3.32E-05	-0.173763487	3.50E-07
Zibotentan	mRNA	KIF11	Expression	GDSC	-0.1708379	5.46E-07	-0.165246702	1.27E-06
ZSTK474	mRNA	KIF11	Expression	GDSC	-0.1494996	1.86E-05	-0.146862091	3.49E-05
