# Supplementary material for: KIF11 As a Potential Pan-Cancer Immunological Biomarker Encompassing the Disease Staging, Prognoses, Tumor Microenvironment, and Therapeutic Responses
Source: Oxid Med Cell Longev. 2022 Dec 16;2022:2764940. doi: 10.1155/2022/2764940 (PMC9893523; doi:10.1155/2022/2764940)
Supplement: Supplementary 13 — Supplementary Table 8: the KIF11 coexpression genes in HNSC cohort. [file 2764940.f13.txt]

Query	Statistic	P-value	FDR (BH)
TOM1	-0.581922748	1.87E-48	2.23E-46
FAM89B	-0.520678143	1.80E-37	1.50E-35
PINK1	-0.508099752	1.76E-35	1.39E-33
SNX21	-0.492477323	4.02E-33	2.93E-31
PODNL1	-0.488112715	1.75E-32	1.23E-30
TMEM150A	-0.480724751	2.00E-31	1.33E-29
RABAC1	-0.480551792	2.11E-31	1.41E-29
C17orf91	-0.477736027	5.27E-31	3.46E-29
POLD4	-0.468929786	8.67E-30	5.40E-28
CST3	-0.463362535	4.89E-29	2.92E-27
TMED3	-0.45868759	2.04E-28	1.18E-26
SPON2	-0.456971784	3.42E-28	1.96E-26
FAM127A	-0.455664078	5.07E-28	2.89E-26
IGSF8	-0.453754692	8.98E-28	4.99E-26
GJA1	-0.453087064	1.10E-27	6.05E-26
USP2	-0.452972138	1.13E-27	6.24E-26
DKFZp779M0652	-0.4519023	1.56E-27	8.51E-26
DNAJB2	-0.449651134	3.03E-27	1.64E-25
TUBB2A	-0.447757801	5.27E-27	2.79E-25
ZNF668	-0.446423339	7.78E-27	4.10E-25
UBTD1	-0.443158344	2.00E-26	1.04E-24
CST6	-0.443062669	2.06E-26	1.06E-24
ATP6V0D1	-0.440399315	4.41E-26	2.23E-24
HSPB3	-0.439774045	5.28E-26	2.65E-24
UBE2F	-0.436896722	1.19E-25	5.78E-24
DAPK3	-0.435215436	1.91E-25	9.12E-24
DLGAP4	-0.434040903	2.66E-25	1.25E-23
METRNL	-0.433807852	2.83E-25	1.33E-23
REXO2	-0.432497508	4.08E-25	1.91E-23
STX4	-0.428638677	1.18E-24	5.42E-23
NDEL1	-0.426211612	2.30E-24	1.02E-22
LPPR2	-0.424546219	3.61E-24	1.59E-22
MAP1LC3B	-0.424227938	3.94E-24	1.73E-22
YIPF2	-0.419001456	1.60E-23	6.77E-22
ENDOD1	-0.416034888	3.50E-23	1.45E-21
PLSCR3	-0.415894369	3.63E-23	1.51E-21
MUCL1	-0.414672066	5.00E-23	2.06E-21
C1orf170	-0.413702624	6.44E-23	2.63E-21
SYNC	-0.413605579	6.61E-23	2.69E-21
DOK4	-0.413577051	6.66E-23	2.71E-21
DEXI	-0.413181074	7.38E-23	2.98E-21
VKORC1	-0.4130776	7.59E-23	3.06E-21
TOLLIP	-0.412590619	8.61E-23	3.45E-21
TUBA4A	-0.41113593	1.26E-22	4.95E-21
CHPF	-0.410734003	1.39E-22	5.47E-21
PLEKHM2	-0.410541177	1.46E-22	5.74E-21
CDA	-0.409808021	1.77E-22	6.87E-21
KIAA1539	-0.408638783	2.39E-22	9.26E-21
HOMER3	-0.407989229	2.82E-22	1.08E-20
CTSA	-0.406894886	3.73E-22	1.41E-20
KRT16	-0.406131034	4.53E-22	1.71E-20
ARSA	-0.406080392	4.59E-22	1.73E-20
DMKN	-0.401808968	1.35E-21	4.94E-20
CXCL14	-0.401495073	1.46E-21	5.32E-20
MMP17	-0.400877771	1.70E-21	6.18E-20
KRT75	-0.399629744	2.33E-21	8.33E-20
C4orf3	-0.396970348	4.49E-21	1.57E-19
GNPTG	-0.3968247	4.66E-21	1.62E-19
ARFGAP1	-0.396321273	5.27E-21	1.82E-19
C6orf145	-0.39463002	7.98E-21	2.73E-19
IGFL2	-0.394428896	8.39E-21	2.87E-19
GRN	-0.393241627	1.12E-20	3.80E-19
FBLIM1	-0.393172208	1.14E-20	3.86E-19
MFAP2	-0.393040019	1.18E-20	3.97E-19
DHRS7	-0.391601699	1.67E-20	5.56E-19
CCDC159	-0.391080665	1.89E-20	6.29E-19
BPIL2	-0.390725085	2.06E-20	6.83E-19
TPST2	-0.390103762	2.40E-20	7.88E-19
IGLON5	-0.390047279	2.43E-20	7.96E-19
QSOX1	-0.38997611	2.47E-20	8.09E-19
UBE2V1	-0.389379486	2.85E-20	9.27E-19
SMOX	-0.389354268	2.87E-20	9.31E-19
TBC1D10A	-0.389285625	2.92E-20	9.44E-19
FAM176B	-0.389270361	2.93E-20	9.46E-19
CLEC11A	-0.389196331	2.98E-20	9.61E-19
CEBPB	-0.389043797	3.09E-20	9.96E-19
LDLRAD2	-0.388400763	3.61E-20	1.16E-18
CDKN1A	-0.387984002	3.98E-20	1.28E-18
IVL	-0.387887808	4.08E-20	1.30E-18
HTRA1	-0.386674272	5.44E-20	1.72E-18
PNLIPRP3	-0.38548634	7.22E-20	2.25E-18
S100A7	-0.384116708	9.98E-20	3.07E-18
GATSL3	-0.384055594	1.01E-19	3.11E-18
VASN	-0.383383032	1.19E-19	3.63E-18
LGALS7	-0.383183344	1.24E-19	3.79E-18
SLC24A3	-0.382975421	1.31E-19	3.97E-18
SEPT5	-0.381449693	1.87E-19	5.60E-18
C22orf9	-0.380721314	2.21E-19	6.59E-18
SMPD1	-0.380190747	2.51E-19	7.43E-18
SBSN	-0.379872664	2.70E-19	7.98E-18
FAM174A	-0.379597334	2.88E-19	8.48E-18
GABARAPL2	-0.379436015	2.99E-19	8.78E-18
GLTPD1	-0.378457837	3.75E-19	1.09E-17
BBOX1	-0.378392874	3.80E-19	1.11E-17
LYNX1	-0.377365428	4.82E-19	1.38E-17
NGF	-0.37690267	5.36E-19	1.52E-17
CRABP2	-0.376251065	6.23E-19	1.76E-17
CRYAB	-0.376243977	6.24E-19	1.76E-17
C11orf68	-0.376202441	6.30E-19	1.77E-17
SMTN	-0.37587596	6.79E-19	1.90E-17
D4S234E	-0.375837779	6.85E-19	1.92E-17
SH3BGRL3	-0.374733948	8.82E-19	2.45E-17
CHPF2	-0.373559644	1.15E-18	3.17E-17
GALK1	-0.372663588	1.41E-18	3.87E-17
YIF1A	-0.371941327	1.66E-18	4.52E-17
SLC39A13	-0.370603928	2.25E-18	6.06E-17
TUBA1A	-0.369289863	3.02E-18	8.08E-17
VAT1	-0.369281022	3.03E-18	8.09E-17
TIAF1	-0.369196745	3.09E-18	8.23E-17
DUSP14	-0.368305669	3.77E-18	1.00E-16
SIRT2	-0.368113639	3.93E-18	1.04E-16
RDH12	-0.368099086	3.94E-18	1.04E-16
FAM195B	-0.367677054	4.33E-18	1.14E-16
CLIC3	-0.367241115	4.78E-18	1.25E-16
TSPAN31	-0.366579178	5.53E-18	1.44E-16
GADD45B	-0.366320866	5.86E-18	1.53E-16
COX7A1	-0.365849112	6.50E-18	1.69E-16
DYNLL1	-0.365807511	6.56E-18	1.71E-16
MVP	-0.365231416	7.46E-18	1.93E-16
SLC5A10	-0.364549288	8.67E-18	2.23E-16
ACAA1	-0.363849398	1.01E-17	2.58E-16
KLK5	-0.363542155	1.08E-17	2.75E-16
LCE3E	-0.363426469	1.11E-17	2.81E-16
ATP6V0A1	-0.363260361	1.15E-17	2.91E-16
WIPI1	-0.363058587	1.20E-17	3.03E-16
P4HB	-0.362887908	1.25E-17	3.13E-16
LGALS7B	-0.362544616	1.35E-17	3.37E-16
TPRG1L	-0.362475134	1.37E-17	3.42E-16
SORCS2	-0.362301134	1.42E-17	3.54E-16
TMEM88	-0.362092511	1.49E-17	3.70E-16
ZNF846	-0.361769173	1.60E-17	3.97E-16
SPTLC3	-0.361738932	1.61E-17	3.99E-16
GLIS1	-0.361536048	1.68E-17	4.16E-16
PAQR7	-0.361318122	1.76E-17	4.36E-16
C6orf1	-0.361317727	1.76E-17	4.36E-16
ELMOD1	-0.361046998	1.87E-17	4.60E-16
TNNT2	-0.360828407	1.96E-17	4.81E-16
MMP1	-0.36082492	1.96E-17	4.81E-16
TRADD	-0.360785622	1.98E-17	4.84E-16
SPRR2G	-0.360419039	2.14E-17	5.24E-16
TMEM45A	-0.359907107	2.39E-17	5.82E-16
NUDT22	-0.35881394	3.03E-17	7.32E-16
GSDMA	-0.358722234	3.09E-17	7.46E-16
UBAC2	-0.3585179	3.23E-17	7.77E-16
TMEM185A	-0.358389759	3.32E-17	7.98E-16
SFN	-0.358292407	3.39E-17	8.14E-16
RNASEK	-0.358272329	3.41E-17	8.17E-16
SCYL1	-0.357878919	3.71E-17	8.87E-16
PMEPA1	-0.357707824	3.85E-17	9.19E-16
COMMD1	-0.357178982	4.31E-17	1.03E-15
IGFL3	-0.357092146	4.39E-17	1.05E-15
IGFN1	-0.356915945	4.56E-17	1.08E-15
RTN2	-0.356604128	4.88E-17	1.15E-15
MICAL1	-0.356373315	5.12E-17	1.21E-15
PDLIM7	-0.356062861	5.48E-17	1.29E-15
FAM109A	-0.355976671	5.58E-17	1.31E-15
CARD18	-0.355639884	5.99E-17	1.41E-15
LAMP1	-0.355389023	6.32E-17	1.48E-15
NLRX1	-0.35533992	6.39E-17	1.49E-15
MFRP	-0.354973666	6.91E-17	1.61E-15
KRTDAP	-0.354965331	6.92E-17	1.61E-15
ABCG4	-0.354791675	7.18E-17	1.67E-15
PHF23	-0.354281235	8.01E-17	1.85E-15
RRBP1	-0.354219135	8.11E-17	1.87E-15
ATP6V1D	-0.354057006	8.40E-17	1.94E-15
GFOD2	-0.353500423	9.45E-17	2.17E-15
LCMT1	-0.353365209	9.72E-17	2.23E-15
CES7	-0.353311928	9.83E-17	2.26E-15
PRDX5	-0.353186051	1.01E-16	2.31E-15
AKTIP	-0.353114164	1.03E-16	2.34E-15
OLFM2	-0.353075281	1.03E-16	2.36E-15
SRRD	-0.353071413	1.03E-16	2.36E-15
ANO10	-0.352855792	1.08E-16	2.46E-15
FOLR3	-0.352831233	1.09E-16	2.47E-15
STARD10	-0.352449467	1.18E-16	2.67E-15
HM13	-0.352168025	1.25E-16	2.82E-15
KIAA0415	-0.351957955	1.31E-16	2.94E-15
GUK1	-0.351261981	1.52E-16	3.39E-15
MYOM3	-0.351222186	1.53E-16	3.41E-15
MFGE8	-0.351114291	1.56E-16	3.48E-15
ZNF622	-0.350832045	1.66E-16	3.68E-15
PPIC	-0.350759438	1.68E-16	3.73E-15
CD36	-0.350443074	1.80E-16	3.97E-15
ARFRP1	-0.350349754	1.84E-16	4.04E-15
ASCC2	-0.349902465	2.02E-16	4.41E-15
CDSN	-0.34975998	2.08E-16	4.54E-15
FLJ23867	-0.34902669	2.42E-16	5.28E-15
KLK8	-0.34885712	2.51E-16	5.45E-15
CD151	-0.348817534	2.53E-16	5.48E-15
EPGN	-0.348259547	2.84E-16	6.13E-15
LOC654342	-0.348252109	2.85E-16	6.13E-15
SEPW1	-0.348173877	2.89E-16	6.22E-15
KRT10	-0.347784216	3.14E-16	6.72E-15
CD81	-0.347706747	3.19E-16	6.82E-15
FABP5	-0.347272323	3.49E-16	7.45E-15
TMEM134	-0.347119019	3.60E-16	7.67E-15
MED8	-0.346838394	3.82E-16	8.11E-15
PHLDB3	-0.346649214	3.97E-16	8.42E-15
STK19	-0.345905326	4.63E-16	9.74E-15
MAP7D1	-0.345809024	4.72E-16	9.92E-15
H2AFJ	-0.345786258	4.74E-16	9.95E-15
MXD4	-0.345675389	4.85E-16	1.02E-14
DSTN	-0.345637284	4.89E-16	1.02E-14
COL16A1	-0.345564456	4.96E-16	1.04E-14
VPS28	-0.345224666	5.32E-16	1.11E-14
MSX2	-0.34522143	5.33E-16	1.11E-14
ATP6V1E1	-0.345098016	5.46E-16	1.14E-14
ZMAT5	-0.34490644	5.68E-16	1.18E-14
FLJ16779	-0.344707635	5.92E-16	1.23E-14
GPR1	-0.344581691	6.08E-16	1.26E-14
DVL1	-0.344309914	6.43E-16	1.32E-14
CLTB	-0.34423373	6.53E-16	1.34E-14
TMEM79	-0.344220957	6.54E-16	1.34E-14
SLURP1	-0.343604323	7.42E-16	1.52E-14
NAPA	-0.34342228	7.71E-16	1.57E-14
FSTL3	-0.343415032	7.72E-16	1.57E-14
TUBB3	-0.343348734	7.82E-16	1.59E-14
FIS1	-0.343331388	7.85E-16	1.59E-14
DTX1	-0.342941643	8.50E-16	1.72E-14
HSPB2	-0.342710695	8.91E-16	1.80E-14
GABARAP	-0.342409695	9.48E-16	1.91E-14
SFRS2B	-0.342396126	9.50E-16	1.91E-14
KIFC3	-0.341791384	1.07E-15	2.15E-14
OBSL1	-0.341709903	1.09E-15	2.18E-14
WFDC12	-0.341656373	1.10E-15	2.20E-14
SERTAD1	-0.341342233	1.18E-15	2.34E-14
CIDEA	-0.34108051	1.24E-15	2.46E-14
KCNK7	-0.340965745	1.27E-15	2.51E-14
KRT14	-0.340525037	1.39E-15	2.73E-14
MYL12A	-0.34050656	1.39E-15	2.74E-14
KIF1C	-0.340493153	1.40E-15	2.74E-14
GRK4	-0.340190182	1.49E-15	2.91E-14
STUB1	-0.33992211	1.57E-15	3.07E-14
CDH15	-0.339425585	1.73E-15	3.37E-14
ZBTB17	-0.339188621	1.82E-15	3.52E-14
RGL2	-0.339184034	1.82E-15	3.52E-14
LOC645166	-0.338971903	1.90E-15	3.67E-14
MAF	-0.338524018	2.08E-15	4.01E-14
TP53I3	-0.338440239	2.12E-15	4.07E-14
C7orf10	-0.338230044	2.21E-15	4.24E-14
TGFB1	-0.338218125	2.21E-15	4.25E-14
BOK	-0.338151044	2.24E-15	4.29E-14
RHOD	-0.337738825	2.43E-15	4.65E-14
GMPPA	-0.337546147	2.53E-15	4.83E-14
C1orf122	-0.337467624	2.57E-15	4.90E-14
DIRAS1	-0.337430477	2.59E-15	4.94E-14
RNF149	-0.337242685	2.69E-15	5.12E-14
CCDC92	-0.337132186	2.75E-15	5.22E-14
EFNA3	-0.337112123	2.76E-15	5.24E-14
KANK4	-0.337014426	2.81E-15	5.33E-14
CYHR1	-0.336964293	2.84E-15	5.38E-14
GPR111	-0.336788376	2.94E-15	5.55E-14
NBL1	-0.336559094	3.08E-15	5.80E-14
TUBB4	-0.336226985	3.29E-15	6.18E-14
MMP2	-0.335896106	3.52E-15	6.58E-14
C17orf55	-0.33579825	3.59E-15	6.70E-14
ATP6V0E1	-0.335728797	3.64E-15	6.78E-14
PGLYRP4	-0.335056059	4.16E-15	7.71E-14
YKT6	-0.33505108	4.16E-15	7.71E-14
RTN4	-0.335009703	4.20E-15	7.76E-14
MOB2	-0.334835352	4.34E-15	8.03E-14
NOD2	-0.334707222	4.45E-15	8.23E-14
PPP2R5B	-0.334579299	4.57E-15	8.41E-14
MSRB2	-0.334443964	4.69E-15	8.63E-14
GALNT6	-0.334300558	4.83E-15	8.86E-14
WNT11	-0.334169128	4.96E-15	9.08E-14
YPEL5	-0.33404065	5.08E-15	9.28E-14
EPS8L1	-0.333972489	5.15E-15	9.39E-14
KLC3	-0.333883311	5.24E-15	9.54E-14
DEF8	-0.333868241	5.26E-15	9.56E-14
AG2	-0.333711244	5.42E-15	9.83E-14
PTGER3	-0.333650329	5.49E-15	9.94E-14
PTK6	-0.333148727	6.06E-15	1.10E-13
MEIS3	-0.332931847	6.33E-15	1.14E-13
SCAND1	-0.332660979	6.67E-15	1.20E-13
JOSD2	-0.332553432	6.81E-15	1.22E-13
PCBP4	-0.332552009	6.82E-15	1.22E-13
CDC34	-0.332370909	7.06E-15	1.27E-13
WBP2	-0.33156118	8.28E-15	1.48E-13
CD59	-0.331360465	8.61E-15	1.54E-13
TNFRSF1A	-0.331331434	8.66E-15	1.54E-13
CERCAM	-0.331103395	9.06E-15	1.61E-13
CGB5	-0.330572291	1.00E-14	1.77E-13
RUNDC3A	-0.330322931	1.05E-14	1.86E-13
CAPZB	-0.330242082	1.07E-14	1.89E-13
SCN2B	-0.330008247	1.12E-14	1.97E-13
KCNK6	-0.329853318	1.16E-14	2.03E-13
SESN2	-0.329759938	1.18E-14	2.06E-13
CWH43	-0.329538261	1.23E-14	2.15E-13
ARMC5	-0.329508799	1.24E-14	2.16E-13
2-Mar	-0.329476745	1.24E-14	2.17E-13
SCNN1D	-0.329372427	1.27E-14	2.21E-13
BCKDK	-0.329223238	1.31E-14	2.27E-13
KLK7	-0.329113396	1.33E-14	2.32E-13
NIT1	-0.329066062	1.35E-14	2.34E-13
TSPAN10	-0.329004438	1.36E-14	2.36E-13
KRT17	-0.32843237	1.52E-14	2.63E-13
RNH1	-0.327966448	1.67E-14	2.87E-13
NNMT	-0.327831484	1.71E-14	2.95E-13
C16orf72	-0.327789288	1.72E-14	2.97E-13
HMOX2	-0.327581497	1.80E-14	3.08E-13
FAM25A	-0.32737729	1.87E-14	3.20E-13
LOC550643	-0.327256998	1.91E-14	3.27E-13
S100A7A	-0.327143008	1.95E-14	3.33E-13
KIFAP3	-0.327139806	1.95E-14	3.33E-13
SCT	-0.327118589	1.96E-14	3.35E-13
TMEM102	-0.326997495	2.01E-14	3.42E-13
KRT79	-0.326675471	2.14E-14	3.62E-13
PLIN3	-0.326523069	2.20E-14	3.72E-13
C4orf10	-0.326504606	2.21E-14	3.73E-13
TMED9	-0.326365317	2.27E-14	3.82E-13
PNPLA1	-0.326363327	2.27E-14	3.82E-13
TM4SF19	-0.325645313	2.61E-14	4.36E-13
SELM	-0.325544387	2.66E-14	4.44E-13
EFEMP2	-0.325499709	2.68E-14	4.47E-13
FABP5L3	-0.324614488	3.17E-14	5.27E-13
IL18	-0.324373687	3.32E-14	5.51E-13
LCE3D	-0.32377996	3.72E-14	6.14E-13
C9orf7	-0.323681369	3.79E-14	6.25E-13
LRPAP1	-0.323102375	4.23E-14	6.94E-13
PPP1R14A	-0.322989386	4.32E-14	7.08E-13
HOMER2	-0.322809922	4.47E-14	7.32E-13
NKAIN4	-0.322707048	4.56E-14	7.46E-13
ITGB5	-0.32248597	4.76E-14	7.76E-13
FHOD1	-0.322441592	4.80E-14	7.82E-13
BNIPL	-0.322346128	4.88E-14	7.95E-13
PPDPF	-0.322129346	5.09E-14	8.25E-13
RGS12	-0.321826013	5.39E-14	8.73E-13
KRT1	-0.321786413	5.43E-14	8.79E-13
UBXN6	-0.32173527	5.48E-14	8.86E-13
TMEM86A	-0.32159675	5.63E-14	9.08E-13
FAM25B	-0.321430336	5.81E-14	9.37E-13
PIM1	-0.321382175	5.86E-14	9.44E-13
MMP3	-0.321219723	6.04E-14	9.72E-13
ANXA13	-0.321195204	6.07E-14	9.76E-13
MMP13	-0.321065456	6.22E-14	9.99E-13
CYB5R1	-0.321016411	6.28E-14	1.01E-12
CYP39A1	-0.320957788	6.35E-14	1.02E-12
LOC100302650	-0.320929724	6.38E-14	1.02E-12
NFATC4	-0.320684083	6.68E-14	1.07E-12
SCN3B	-0.320636098	6.74E-14	1.08E-12
HSPC159	-0.320634377	6.75E-14	1.08E-12
MARK4	-0.320544528	6.86E-14	1.09E-12
FKBP2	-0.320499354	6.92E-14	1.10E-12
KCTD11	-0.320340907	7.13E-14	1.13E-12
ITM2B	-0.320323667	7.15E-14	1.13E-12
NFE2	-0.320166719	7.37E-14	1.16E-12
ARRDC4	-0.319537685	8.29E-14	1.31E-12
FAM46B	-0.319532373	8.30E-14	1.31E-12
CTNNBIP1	-0.319294724	8.67E-14	1.36E-12
TNFAIP8L3	-0.319251235	8.75E-14	1.37E-12
PPP2R1A	-0.319213582	8.81E-14	1.38E-12
WDR86	-0.319026403	9.12E-14	1.43E-12
ATP6V0C	-0.318965139	9.23E-14	1.44E-12
SLC37A2	-0.318758836	9.59E-14	1.50E-12
RNASE7	-0.318516609	1.00E-13	1.56E-12
SNPH	-0.318454492	1.01E-13	1.58E-12
CEACAM19	-0.318350535	1.03E-13	1.61E-12
PTH1R	-0.318317315	1.04E-13	1.61E-12
TMEM184A	-0.318122455	1.08E-13	1.67E-12
YPEL3	-0.318095713	1.09E-13	1.68E-12
NAGK	-0.317487153	1.22E-13	1.87E-12
PPP2R2C	-0.317190662	1.28E-13	1.97E-12
SERF2	-0.317091747	1.31E-13	2.00E-12
PMM2	-0.317051415	1.32E-13	2.02E-12
IGFL1	-0.317019335	1.33E-13	2.03E-12
DSC1	-0.316786027	1.38E-13	2.11E-12
OTUB1	-0.316606109	1.43E-13	2.18E-12
C20orf135	-0.316577151	1.44E-13	2.18E-12
KRT6B	-0.316525413	1.45E-13	2.20E-12
FHL2	-0.316471561	1.47E-13	2.22E-12
LIPK	-0.316456086	1.47E-13	2.23E-12
MXRA8	-0.316402547	1.49E-13	2.25E-12
MFSD3	-0.316209561	1.54E-13	2.33E-12
MYEOV2	-0.315997176	1.60E-13	2.42E-12
C17orf103	-0.315974574	1.61E-13	2.43E-12
OTUB2	-0.315953998	1.61E-13	2.43E-12
LIPM	-0.31592984	1.62E-13	2.44E-12
PROC	-0.315929299	1.62E-13	2.44E-12
CRCT1	-0.31587931	1.64E-13	2.46E-12
CES8	-0.315722886	1.69E-13	2.53E-12
CNFN	-0.315699368	1.69E-13	2.54E-12
LMBR1L	-0.315360658	1.80E-13	2.69E-12
STX8	-0.31513387	1.88E-13	2.80E-12
PHLDA3	-0.31499811	1.93E-13	2.87E-12
SPOCD1	-0.314795162	2.00E-13	2.97E-12
LCE2A	-0.314783535	2.00E-13	2.98E-12
RCN3	-0.31451808	2.10E-13	3.12E-12
MYL6	-0.313605211	2.49E-13	3.67E-12
OCEL1	-0.313587332	2.50E-13	3.68E-12
OST4	-0.313514169	2.53E-13	3.72E-12
EIF2B4	-0.313489242	2.54E-13	3.74E-12
LOC100271831	-0.31348875	2.54E-13	3.74E-12
DBNL	-0.313303767	2.63E-13	3.86E-12
KIFC2	-0.31323774	2.66E-13	3.90E-12
PTS	-0.313175682	2.69E-13	3.94E-12
RGS2	-0.313172317	2.69E-13	3.94E-12
KLC1	-0.312900923	2.83E-13	4.14E-12
CCDC107	-0.312894693	2.83E-13	4.14E-12
C13orf15	-0.312894253	2.83E-13	4.14E-12
VWA1	-0.312683388	2.95E-13	4.29E-12
SHISA4	-0.312664629	2.96E-13	4.31E-12
DNAJB6	-0.312628056	2.98E-13	4.33E-12
HIST2H2AA3	-0.312586263	3.00E-13	4.36E-12
DRAP1	-0.31255969	3.01E-13	4.38E-12
PLK3	-0.312440899	3.08E-13	4.47E-12
TNFRSF12A	-0.31242346	3.09E-13	4.48E-12
TMBIM1	-0.311736434	3.50E-13	5.04E-12
ELOVL1	-0.311654366	3.55E-13	5.12E-12
VIPR1	-0.311336968	3.76E-13	5.41E-12
MDFI	-0.31131561	3.78E-13	5.42E-12
PRSS23	-0.311306648	3.78E-13	5.43E-12
SGSM3	-0.311095606	3.93E-13	5.63E-12
DEFB103B	-0.311088533	3.94E-13	5.63E-12
TMEM179B	-0.31104178	3.97E-13	5.67E-12
PTDSS2	-0.311039428	3.97E-13	5.67E-12
AK5	-0.311009141	3.99E-13	5.70E-12
BEAN	-0.310890226	4.08E-13	5.82E-12
POU3F1	-0.31061567	4.29E-13	6.10E-12
BGN	-0.310523512	4.36E-13	6.19E-12
FLRT3	-0.310375204	4.48E-13	6.35E-12
ASPRV1	-0.310141421	4.67E-13	6.61E-12
NME3	-0.310111468	4.70E-13	6.65E-12
HTRA3	-0.310028701	4.77E-13	6.74E-12
SDR9C7	-0.309965765	4.83E-13	6.81E-12
SLPI	-0.309736457	5.03E-13	7.08E-12
ARF4	-0.309731704	5.03E-13	7.08E-12
SPRR1B	-0.309607486	5.15E-13	7.23E-12
ST3GAL6	-0.309588398	5.17E-13	7.24E-12
VTI1B	-0.309587765	5.17E-13	7.24E-12
GALNS	-0.30935828	5.38E-13	7.53E-12
SAT2	-0.309219725	5.52E-13	7.71E-12
TBX1	-0.309158869	5.58E-13	7.78E-12
CALB2	-0.30913707	5.60E-13	7.81E-12
PLEKHN1	-0.309122604	5.62E-13	7.82E-12
MAP1LC3B2	-0.308907537	5.84E-13	8.12E-12
LCE1A	-0.30885726	5.89E-13	8.18E-12
NOL3	-0.308626911	6.14E-13	8.52E-12
SLC39A7	-0.308498562	6.29E-13	8.71E-12
TAGLN	-0.308011397	6.86E-13	9.47E-12
SEC61G	-0.307824614	7.09E-13	9.77E-12
LCE2D	-0.307784043	7.15E-13	9.84E-12
TWIST2	-0.307268191	7.84E-13	1.07E-11
RHOB	-0.307209783	7.92E-13	1.08E-11
TAX1BP3	-0.307129415	8.03E-13	1.10E-11
STX1A	-0.306999997	8.22E-13	1.12E-11
IPO13	-0.306998937	8.22E-13	1.12E-11
VSIG8	-0.306949686	8.30E-13	1.13E-11
KRT6C	-0.306851942	8.44E-13	1.15E-11
ZNF467	-0.30682131	8.49E-13	1.16E-11
LZTR1	-0.306406502	9.14E-13	1.24E-11
SPNS2	-0.306108448	9.64E-13	1.31E-11
FAP	-0.306004128	9.82E-13	1.33E-11
C20orf103	-0.305962461	9.89E-13	1.34E-11
XG	-0.305929475	9.95E-13	1.34E-11
CCS	-0.305588486	1.06E-12	1.42E-11
ADAM33	-0.305519526	1.07E-12	1.44E-11
KLHDC8B	-0.305400561	1.09E-12	1.47E-11
TRAPPC2P1	-0.305321902	1.11E-12	1.48E-11
RER1	-0.305298328	1.11E-12	1.49E-11
POLR2L	-0.305257907	1.12E-12	1.50E-11
CPA4	-0.304978159	1.18E-12	1.57E-11
DNAJC30	-0.304963186	1.18E-12	1.57E-11
SCARF2	-0.304924241	1.19E-12	1.58E-11
CCDC96	-0.304673097	1.24E-12	1.65E-11
SIL1	-0.304632608	1.25E-12	1.66E-11
PI3	-0.304548744	1.27E-12	1.68E-11
SPRR2B	-0.304453789	1.29E-12	1.71E-11
OSBPL2	-0.304250532	1.34E-12	1.77E-11
TMPRSS13	-0.304130565	1.37E-12	1.81E-11
C15orf52	-0.30405951	1.39E-12	1.83E-11
PPAPDC3	-0.303698548	1.48E-12	1.95E-11
KDELR1	-0.303537135	1.52E-12	2.00E-11
HLX	-0.303487012	1.53E-12	2.01E-11
GRASP	-0.303454454	1.54E-12	2.02E-11
TBC1D20	-0.303352365	1.57E-12	2.06E-11
LEPRE1	-0.30291848	1.70E-12	2.22E-11
EEF1A2	-0.302796596	1.73E-12	2.26E-11
LCE3A	-0.302780447	1.74E-12	2.27E-11
TCEAL7	-0.302741765	1.75E-12	2.28E-11
UBC	-0.302734473	1.75E-12	2.28E-11
TMEM208	-0.302350214	1.87E-12	2.43E-11
UFSP1	-0.30233061	1.88E-12	2.44E-11
LCE2C	-0.302317101	1.88E-12	2.44E-11
LCE6A	-0.302037441	1.98E-12	2.56E-11
RILP	-0.301842496	2.05E-12	2.64E-11
MYO1H	-0.301820242	2.06E-12	2.65E-11
SEC14L2	-0.301706577	2.10E-12	2.70E-11
ATP6AP1	-0.301672838	2.11E-12	2.71E-11
UPP1	-0.301650745	2.12E-12	2.72E-11
SPATA2L	-0.301507996	2.17E-12	2.79E-11
RILPL1	-0.301489536	2.18E-12	2.79E-11
MOSPD1	-0.301475228	2.18E-12	2.80E-11
C16orf42	-0.301418342	2.21E-12	2.82E-11
FBXO2	-0.301390981	2.22E-12	2.83E-11
LPPR5	-0.301350559	2.23E-12	2.85E-11
MPG	-0.301303066	2.25E-12	2.87E-11
ZBTB22	-0.300994688	2.38E-12	3.02E-11
GNG11	-0.300957995	2.39E-12	3.04E-11
SPHK1	-0.300942712	2.40E-12	3.05E-11
RAB11FIP5	-0.300778999	2.47E-12	3.13E-11
ERCC1	-0.300736132	2.49E-12	3.15E-11
ZCCHC24	-0.300638979	2.53E-12	3.20E-11
KLK6	-0.300476418	2.60E-12	3.29E-11
TRAPPC1	-0.300372768	2.65E-12	3.34E-11
FLJ22536	-0.300326718	2.67E-12	3.36E-11
TPD52L2	-0.300026689	2.81E-12	3.54E-11
ARL14	-0.299895167	2.88E-12	3.62E-11
CASP4	-0.299846426	2.90E-12	3.64E-11
FAHD1	-0.299820519	2.92E-12	3.65E-11
THAP8	-0.299776866	2.94E-12	3.68E-11
LACTB	-0.299719587	2.97E-12	3.71E-11
PRR24	-0.299691595	2.98E-12	3.73E-11
SHC2	-0.299557969	3.05E-12	3.81E-11
SCXB	-0.299292503	3.20E-12	3.98E-11
FHL3	-0.299277821	3.20E-12	3.98E-11
MAP2K3	-0.299033902	3.34E-12	4.15E-11
COMMD5	-0.299029679	3.34E-12	4.15E-11
KCNE1L	-0.299010051	3.36E-12	4.16E-11
RHBDF1	-0.298996602	3.36E-12	4.17E-11
ATOX1	-0.298920401	3.41E-12	4.22E-11
PIP5KL1	-0.2987047	3.54E-12	4.37E-11
ADAMTS7	-0.298386965	3.74E-12	4.62E-11
TRPT1	-0.298340036	3.77E-12	4.65E-11
LRRC29	-0.298022418	3.98E-12	4.90E-11
OBFC2A	-0.297720599	4.19E-12	5.14E-11
GBAP1	-0.297706564	4.20E-12	5.15E-11
PLXDC2	-0.297651869	4.24E-12	5.20E-11
PCDHGC3	-0.297456843	4.39E-12	5.36E-11
C2CD2L	-0.297138273	4.64E-12	5.63E-11
MYL9	-0.296947361	4.79E-12	5.82E-11
RAB1A	-0.296521067	5.15E-12	6.23E-11
KCNJ12	-0.296498851	5.17E-12	6.25E-11
LCE2B	-0.29641405	5.25E-12	6.34E-11
LIMS3	-0.296368655	5.29E-12	6.38E-11
FNDC4	-0.296289826	5.36E-12	6.46E-11
PTRH1	-0.296237949	5.41E-12	6.51E-11
YIPF3	-0.296194204	5.45E-12	6.56E-11
LYPLA2	-0.296142413	5.50E-12	6.61E-11
BIN1	-0.296013305	5.62E-12	6.75E-11
NPR2	-0.295784632	5.85E-12	7.01E-11
ATP5EP2	-0.295755908	5.88E-12	7.05E-11
SEPX1	-0.2956171	6.02E-12	7.21E-11
IL1F10	-0.295561156	6.08E-12	7.27E-11
BRI3	-0.295508758	6.13E-12	7.33E-11
DLX3	-0.295249976	6.41E-12	7.64E-11
KLK9	-0.29508249	6.59E-12	7.84E-11
C13orf16	-0.295067284	6.61E-12	7.86E-11
TIMM8B	-0.294843166	6.87E-12	8.16E-11
SDCBP2	-0.294829968	6.88E-12	8.17E-11
MPST	-0.294790881	6.93E-12	8.21E-11
ATP5E	-0.294735968	7.00E-12	8.29E-11
AK1	-0.294711577	7.02E-12	8.32E-11
WDR13	-0.294439971	7.36E-12	8.69E-11
THBS3	-0.294425094	7.38E-12	8.70E-11
MAPKAPK3	-0.29424314	7.61E-12	8.96E-11
TNKS1BP1	-0.294145693	7.73E-12	9.10E-11
RAB24	-0.294127011	7.76E-12	9.13E-11
CD248	-0.294034364	7.88E-12	9.27E-11
KRT9	-0.294007813	7.92E-12	9.30E-11
CYTH2	-0.29397331	7.96E-12	9.35E-11
SERPINB7	-0.293816276	8.18E-12	9.58E-11
ZDHHC24	-0.293788979	8.22E-12	9.62E-11
GCKR	-0.293640337	8.43E-12	9.86E-11
AKR1B15	-0.293609149	8.47E-12	9.90E-11
CGB8	-0.29355643	8.55E-12	9.98E-11
ZGPAT	-0.293520953	8.60E-12	1.00E-10
P2RX6	-0.293481862	8.66E-12	1.01E-10
LY6G6C	-0.29338307	8.80E-12	1.02E-10
STK25	-0.293382016	8.81E-12	1.02E-10
FXYD1	-0.293233755	9.03E-12	1.05E-10
C5orf46	-0.293171418	9.13E-12	1.06E-10
WTIP	-0.293158615	9.15E-12	1.06E-10
PEA15	-0.293018463	9.36E-12	1.09E-10
FBXO44	-0.292719887	9.85E-12	1.14E-10
C17orf59	-0.292597145	1.01E-11	1.16E-10
NCRNA00162	-0.292472716	1.03E-11	1.18E-10
S100A4	-0.292375682	1.04E-11	1.20E-10
PKNOX2	-0.292320319	1.05E-11	1.21E-10
PHLDB1	-0.292247032	1.07E-11	1.23E-10
GOSR2	-0.292240989	1.07E-11	1.23E-10
PPIB	-0.292197823	1.08E-11	1.23E-10
KIAA0513	-0.292093968	1.09E-11	1.25E-10
LIN7B	-0.291741436	1.16E-11	1.33E-10
SCG5	-0.29171276	1.17E-11	1.34E-10
PMVK	-0.291652636	1.18E-11	1.35E-10
OSTM1	-0.291463837	1.22E-11	1.39E-10
CCM2	-0.291253867	1.26E-11	1.44E-10
PAEP	-0.291002941	1.32E-11	1.50E-10
CGB	-0.290969916	1.32E-11	1.50E-10
RGS20	-0.290955915	1.33E-11	1.51E-10
AMACR	-0.29088101	1.34E-11	1.53E-10
MMP10	-0.290798714	1.36E-11	1.55E-10
GGA1	-0.290637516	1.40E-11	1.59E-10
RAB38	-0.290311894	1.48E-11	1.67E-10
TCF25	-0.289949353	1.57E-11	1.77E-10
MEG3	-0.289881462	1.59E-11	1.79E-10
SLC6A2	-0.289817131	1.60E-11	1.80E-10
PPAPDC1A	-0.289812303	1.61E-11	1.81E-10
C13orf1	-0.289790391	1.61E-11	1.81E-10
ADAMTS14	-0.289629721	1.66E-11	1.86E-10
ATP6V1F	-0.289562699	1.67E-11	1.87E-10
CALM1	-0.289421464	1.71E-11	1.92E-10
ST6GALNAC6	-0.289375555	1.73E-11	1.93E-10
FRMPD1	-0.289322248	1.74E-11	1.95E-10
GPR56	-0.288988337	1.84E-11	2.05E-10
ACADVL	-0.288929157	1.86E-11	2.07E-10
DSG1	-0.288879846	1.88E-11	2.09E-10
AGPAT4	-0.28887422	1.88E-11	2.09E-10
ZFYVE21	-0.288869992	1.88E-11	2.09E-10
FAM43B	-0.288722283	1.93E-11	2.14E-10
SLC9A3R2	-0.288700868	1.93E-11	2.15E-10
SRPX2	-0.288255866	2.08E-11	2.31E-10
LCE1D	-0.288222914	2.09E-11	2.32E-10
CHMP4B	-0.287632538	2.31E-11	2.55E-10
GDPD2	-0.287555105	2.34E-11	2.58E-10
EIF2B2	-0.287432547	2.39E-11	2.63E-10
NKD1	-0.287044573	2.54E-11	2.80E-10
CTNS	-0.28696004	2.58E-11	2.84E-10
TWIST1	-0.286866984	2.62E-11	2.88E-10
MAPK3	-0.28678542	2.66E-11	2.91E-10
TIMP3	-0.286613671	2.73E-11	2.99E-10
FAM54B	-0.286468434	2.80E-11	3.06E-10
CLCN7	-0.286319783	2.87E-11	3.14E-10
SELS	-0.28615363	2.95E-11	3.22E-10
MANBA	-0.286148888	2.95E-11	3.22E-10
S100A16	-0.286109879	2.97E-11	3.24E-10
CNO	-0.286020841	3.01E-11	3.29E-10
DHRS12	-0.285810993	3.12E-11	3.40E-10
GRAP	-0.285692852	3.18E-11	3.46E-10
APCDD1	-0.285622687	3.22E-11	3.50E-10
SLC15A1	-0.285618575	3.22E-11	3.50E-10
CHMP2A	-0.285579784	3.24E-11	3.52E-10
ULK1	-0.285536167	3.26E-11	3.55E-10
ITPA	-0.285476767	3.30E-11	3.58E-10
CHRNA9	-0.285350488	3.36E-11	3.65E-10
EPN1	-0.285269503	3.41E-11	3.70E-10
HSPB1	-0.285195132	3.45E-11	3.74E-10
VAMP8	-0.285026477	3.55E-11	3.84E-10
CITED4	-0.285021939	3.55E-11	3.84E-10
TPM1	-0.284997835	3.57E-11	3.86E-10
DCTN2	-0.284974759	3.58E-11	3.87E-10
LAMB2	-0.284960625	3.59E-11	3.88E-10
METRN	-0.284844722	3.66E-11	3.95E-10
OAF	-0.284803836	3.68E-11	3.97E-10
IGF2AS	-0.284795638	3.69E-11	3.97E-10
PQLC2	-0.284551578	3.84E-11	4.13E-10
SPINK6	-0.284391941	3.94E-11	4.23E-10
COX4I2	-0.284240212	4.04E-11	4.33E-10
EPHB3	-0.28417696	4.08E-11	4.37E-10
TERF2IP	-0.284139079	4.10E-11	4.40E-10
EHD1	-0.284112202	4.12E-11	4.41E-10
S100A12	-0.284044165	4.17E-11	4.46E-10
BFSP1	-0.283980041	4.21E-11	4.50E-10
RPL3L	-0.283845766	4.30E-11	4.60E-10
TSPAN9	-0.283757534	4.37E-11	4.65E-10
RNF222	-0.28361909	4.47E-11	4.76E-10
CACNA1G	-0.28358299	4.49E-11	4.78E-10
SAMD11	-0.283548249	4.52E-11	4.81E-10
C11orf63	-0.28342091	4.61E-11	4.90E-10
LYPD3	-0.283207593	4.78E-11	5.06E-10
SIRPA	-0.283104083	4.86E-11	5.14E-10
HOXC13	-0.283038316	4.91E-11	5.19E-10
EHBP1L1	-0.28289791	5.02E-11	5.31E-10
ENDOU	-0.282892725	5.03E-11	5.31E-10
LIMK2	-0.28279643	5.11E-11	5.39E-10
LOC100131726	-0.282748894	5.15E-11	5.42E-10
GIPC1	-0.282738262	5.16E-11	5.43E-10
RAB2A	-0.282650808	5.23E-11	5.50E-10
PERP	-0.282378872	5.47E-11	5.74E-10
FGGY	-0.28230202	5.53E-11	5.81E-10
ZYX	-0.282120871	5.70E-11	5.96E-10
PAM	-0.282014795	5.80E-11	6.06E-10
ACP5	-0.281969502	5.84E-11	6.09E-10
SLC38A5	-0.281963107	5.85E-11	6.09E-10
JPH2	-0.281887407	5.92E-11	6.17E-10
ROMO1	-0.281853171	5.95E-11	6.20E-10
GRIA3	-0.281791001	6.01E-11	6.25E-10
SGSH	-0.281669566	6.13E-11	6.37E-10
OVCA2	-0.28159948	6.20E-11	6.43E-10
LIPN	-0.28159476	6.21E-11	6.43E-10
CCDC85B	-0.281576398	6.23E-11	6.44E-10
MAFB	-0.281562313	6.24E-11	6.46E-10
NRBF2	-0.281554077	6.25E-11	6.46E-10
MMP24	-0.281469571	6.33E-11	6.54E-10
MANF	-0.28132349	6.49E-11	6.69E-10
PNPLA2	-0.281155173	6.66E-11	6.87E-10
FURIN	-0.281101169	6.72E-11	6.92E-10
MMP23B	-0.280349051	7.59E-11	7.78E-10
SOX11	-0.280304959	7.64E-11	7.83E-10
ACTR1A	-0.280259446	7.70E-11	7.88E-10
TMEM63B	-0.280115824	7.88E-11	8.04E-10
AIM1L	-0.280101243	7.90E-11	8.05E-10
LOC728392	-0.280066977	7.94E-11	8.08E-10
SLC4A3	-0.279739695	8.37E-11	8.49E-10
PRSS53	-0.279675867	8.46E-11	8.57E-10
COL6A2	-0.279641196	8.50E-11	8.62E-10
LYSMD4	-0.279466618	8.75E-11	8.84E-10
C21orf7	-0.279235141	9.08E-11	9.16E-10
GDI1	-0.279127028	9.24E-11	9.32E-10
COL18A1	-0.279000936	9.42E-11	9.49E-10
B3GNT4	-0.278806307	9.72E-11	9.77E-10
LGALS9C	-0.278625289	1.00E-10	1.00E-09
EIF4E2	-0.278591918	1.01E-10	1.01E-09
GJB2	-0.278576262	1.01E-10	1.01E-09
ATP13A2	-0.278495473	1.02E-10	1.02E-09
DUSP22	-0.278468407	1.03E-10	1.03E-09
KLK4	-0.27845794	1.03E-10	1.03E-09
WBP5	-0.278402898	1.04E-10	1.04E-09
CCDC124	-0.278346917	1.05E-10	1.04E-09
AGAP3	-0.278232453	1.07E-10	1.06E-09
RAB11FIP3	-0.278028139	1.10E-10	1.10E-09
IGF2	-0.278025159	1.10E-10	1.10E-09
AVEN	-0.278017196	1.10E-10	1.10E-09
SDC1	-0.277988095	1.11E-10	1.10E-09
MYH13	-0.277987323	1.11E-10	1.10E-09
C4orf48	-0.277905094	1.12E-10	1.12E-09
FKBP8	-0.277820996	1.14E-10	1.13E-09
MAP4	-0.277792139	1.14E-10	1.13E-09
C1orf50	-0.27749872	1.20E-10	1.18E-09
AGTRAP	-0.277449708	1.21E-10	1.19E-09
PAPL	-0.277387113	1.22E-10	1.20E-09
NCDN	-0.277269254	1.24E-10	1.22E-09
TPM2	-0.277200492	1.26E-10	1.24E-09
SLC39A2	-0.277126534	1.27E-10	1.25E-09
RAB4B	-0.277089477	1.28E-10	1.26E-09
SIAE	-0.276755874	1.35E-10	1.32E-09
GPR68	-0.276665038	1.37E-10	1.34E-09
CMTM3	-0.276610082	1.38E-10	1.35E-09
SERPINA9	-0.276359476	1.44E-10	1.40E-09
PDZD4	-0.276358867	1.44E-10	1.40E-09
ZNF408	-0.276219529	1.47E-10	1.43E-09
STX3	-0.276166732	1.48E-10	1.44E-09
AKNAD1	-0.276152493	1.48E-10	1.44E-09
TMEM198	-0.276049726	1.51E-10	1.46E-09
KCNF1	-0.276015415	1.52E-10	1.47E-09
MYL12B	-0.275998302	1.52E-10	1.47E-09
NOTCH2NL	-0.275997788	1.52E-10	1.47E-09
CLVS1	-0.275970158	1.53E-10	1.48E-09
PDZK1IP1	-0.275963431	1.53E-10	1.48E-09
GJB6	-0.275900441	1.54E-10	1.49E-09
CSDC2	-0.275784463	1.57E-10	1.52E-09
SERPINH1	-0.275759184	1.58E-10	1.53E-09
HSD17B2	-0.275648494	1.61E-10	1.55E-09
THEM5	-0.275489656	1.65E-10	1.59E-09
DLX2	-0.275332319	1.69E-10	1.63E-09
ORMDL2	-0.275268889	1.71E-10	1.64E-09
CPEB2	-0.275194773	1.73E-10	1.66E-09
PKIG	-0.275185558	1.73E-10	1.66E-09
C1orf70	-0.275130476	1.74E-10	1.68E-09
TRAPPC3	-0.275039856	1.77E-10	1.70E-09
NXN	-0.275039765	1.77E-10	1.70E-09
TGM5	-0.274941725	1.80E-10	1.72E-09
UCN2	-0.274685137	1.87E-10	1.79E-09
CYR61	-0.27457074	1.90E-10	1.82E-09
HSPB8	-0.274568063	1.90E-10	1.82E-09
SDF4	-0.274235035	2.01E-10	1.91E-09
DLX1	-0.274204961	2.02E-10	1.92E-09
ABP1	-0.274191729	2.02E-10	1.92E-09
LOC100188947	-0.274144813	2.04E-10	1.94E-09
WIPI2	-0.274078483	2.06E-10	1.96E-09
ARG1	-0.274018071	2.08E-10	1.97E-09
AP2S1	-0.273693743	2.18E-10	2.07E-09
C14orf50	-0.273649434	2.20E-10	2.08E-09
GLT8D2	-0.273398088	2.29E-10	2.16E-09
SLC35E4	-0.273369498	2.30E-10	2.17E-09
PCOLCE	-0.273313735	2.32E-10	2.19E-09
CD164L2	-0.273214816	2.35E-10	2.22E-09
COL5A3	-0.27308448	2.40E-10	2.26E-09
CLTCL1	-0.273026648	2.43E-10	2.28E-09
TRAPPC5	-0.272810458	2.51E-10	2.36E-09
KRBA1	-0.272649049	2.57E-10	2.41E-09
CPXM1	-0.272466541	2.65E-10	2.48E-09
FAM100A	-0.272274455	2.73E-10	2.55E-09
SPRR4	-0.272253719	2.74E-10	2.56E-09
SULT2B1	-0.272216142	2.75E-10	2.58E-09
LOC116437	-0.271989622	2.85E-10	2.67E-09
RASAL1	-0.271955063	2.87E-10	2.68E-09
C10orf32	-0.271929671	2.88E-10	2.69E-09
DUSP3	-0.271894259	2.89E-10	2.70E-09
ZHX3	-0.271606254	3.03E-10	2.82E-09
ADAP2	-0.271531456	3.06E-10	2.85E-09
SLC12A4	-0.271444372	3.10E-10	2.89E-09
SIDT2	-0.271361866	3.14E-10	2.92E-09
ANKRD13D	-0.271293244	3.18E-10	2.95E-09
SLC47A2	-0.271282661	3.18E-10	2.95E-09
C1orf123	-0.271192262	3.23E-10	2.99E-09
C2orf84	-0.2711602	3.24E-10	3.00E-09
LY96	-0.271085047	3.28E-10	3.03E-09
SDF2	-0.271049466	3.30E-10	3.05E-09
SHARPIN	-0.270899484	3.38E-10	3.12E-09
NRBP1	-0.270874713	3.39E-10	3.13E-09
SERINC2	-0.270813936	3.42E-10	3.16E-09
AMFR	-0.270804981	3.43E-10	3.16E-09
PRRG2	-0.270787918	3.44E-10	3.16E-09
GGT5	-0.270697127	3.48E-10	3.21E-09
TBC1D17	-0.270646049	3.51E-10	3.23E-09
WFDC5	-0.270543975	3.57E-10	3.28E-09
MN1	-0.270541565	3.57E-10	3.28E-09
PKP3	-0.270454099	3.62E-10	3.32E-09
IL11	-0.270419279	3.64E-10	3.34E-09
PDLIM2	-0.270350394	3.68E-10	3.37E-09
LAMB4	-0.270322024	3.69E-10	3.38E-09
PORCN	-0.27032013	3.69E-10	3.38E-09
SLC22A23	-0.27027245	3.72E-10	3.40E-09
CFL1	-0.270183488	3.77E-10	3.45E-09
STX5	-0.270178276	3.78E-10	3.45E-09
JUP	-0.270087504	3.83E-10	3.49E-09
GPR115	-0.270065175	3.84E-10	3.50E-09
C13orf33	-0.269996564	3.88E-10	3.54E-09
HAGH	-0.269966742	3.90E-10	3.55E-09
NKAIN1	-0.269929493	3.92E-10	3.57E-09
VIT	-0.269708961	4.06E-10	3.69E-09
KPRP	-0.269693372	4.07E-10	3.70E-09
UNC93A	-0.269689702	4.07E-10	3.70E-09
RGS3	-0.269661686	4.09E-10	3.71E-09
RHOQ	-0.269623409	4.11E-10	3.73E-09
NLRP10	-0.269425242	4.24E-10	3.84E-09
SCN4B	-0.268766026	4.69E-10	4.23E-09
SPATA7	-0.268650819	4.78E-10	4.30E-09
WNT4	-0.268547935	4.85E-10	4.36E-09
HCN2	-0.268457172	4.92E-10	4.42E-09
ARHGEF4	-0.268440536	4.93E-10	4.43E-09
INO80B	-0.268309166	5.03E-10	4.51E-09
PRKCDBP	-0.268298225	5.04E-10	4.52E-09
NOX5	-0.268229466	5.10E-10	4.56E-09
B3GNT8	-0.268116543	5.18E-10	4.64E-09
VEGFB	-0.268023545	5.26E-10	4.70E-09
ANKRD35	-0.267977783	5.30E-10	4.74E-09
HES2	-0.267962037	5.31E-10	4.75E-09
CARD14	-0.267949003	5.32E-10	4.75E-09
HIST1H2AC	-0.26790855	5.35E-10	4.78E-09
BASP1	-0.267833424	5.41E-10	4.83E-09
TCHHL1	-0.267789965	5.45E-10	4.86E-09
GPR162	-0.267774628	5.46E-10	4.87E-09
ELL2	-0.267401803	5.78E-10	5.14E-09
NSFL1C	-0.267368948	5.81E-10	5.16E-09
C10orf114	-0.267365964	5.82E-10	5.16E-09
CLEC18A	-0.267238363	5.93E-10	5.25E-09
BPGM	-0.267237345	5.93E-10	5.25E-09
RABEP2	-0.267108205	6.05E-10	5.34E-09
KRT6A	-0.267043785	6.11E-10	5.39E-09
C7orf41	-0.267037048	6.12E-10	5.40E-09
KALRN	-0.267022983	6.13E-10	5.41E-09
TREM2	-0.266957273	6.19E-10	5.45E-09
SSSCA1	-0.266834928	6.31E-10	5.55E-09
C19orf28	-0.266719586	6.42E-10	5.64E-09
AJAP1	-0.266719088	6.42E-10	5.64E-09
SLC5A1	-0.26658561	6.55E-10	5.76E-09
CRISPLD2	-0.266578526	6.56E-10	5.76E-09
GOLGA7B	-0.26649952	6.64E-10	5.83E-09
CD2BP2	-0.266480432	6.66E-10	5.84E-09
PRR5	-0.26640018	6.74E-10	5.91E-09
LEPREL2	-0.266236095	6.91E-10	6.05E-09
PLA2G4F	-0.266214369	6.93E-10	6.07E-09
CRELD2	-0.266188607	6.96E-10	6.09E-09
PBXIP1	-0.265942682	7.22E-10	6.30E-09
CSPG4	-0.265804419	7.38E-10	6.42E-09
CD63	-0.265789555	7.39E-10	6.44E-09
DKFZp434J0226	-0.265767946	7.42E-10	6.45E-09
ATP6V1G1	-0.26573968	7.45E-10	6.48E-09
RRAS	-0.265659874	7.54E-10	6.56E-09
STYXL1	-0.26562115	7.58E-10	6.59E-09
FLNC	-0.265424249	7.81E-10	6.79E-09
SPRR2D	-0.265370525	7.88E-10	6.84E-09
RASA4P	-0.265150477	8.14E-10	7.06E-09
FAM26E	-0.265117503	8.19E-10	7.09E-09
TMEM91	-0.265070248	8.24E-10	7.13E-09
MFSD10	-0.265022594	8.30E-10	7.18E-09
LAMC3	-0.26501336	8.32E-10	7.18E-09
LOC91450	-0.26484835	8.53E-10	7.36E-09
ILK	-0.264808955	8.58E-10	7.40E-09
C1orf113	-0.264797227	8.59E-10	7.41E-09
PAQR5	-0.26466287	8.77E-10	7.55E-09
ZNF662	-0.264613834	8.83E-10	7.60E-09
CCDC89	-0.264606995	8.84E-10	7.61E-09
JMJD8	-0.26438522	9.14E-10	7.86E-09
MYL4	-0.26435974	9.18E-10	7.89E-09
CHST12	-0.264312443	9.24E-10	7.93E-09
EML1	-0.263977082	9.72E-10	8.33E-09
COPZ2	-0.26396265	9.74E-10	8.34E-09
LGALS1	-0.26394965	9.76E-10	8.35E-09
HECW1	-0.263931709	9.79E-10	8.37E-09
SEMA3C	-0.263840607	9.92E-10	8.48E-09
MOSPD3	-0.263838373	9.93E-10	8.48E-09
ECSCR	-0.263829625	9.94E-10	8.49E-09
PLD2	-0.263810667	9.97E-10	8.51E-09
ZFPL1	-0.263765233	1.00E-09	8.56E-09
RBP1	-0.263754116	1.01E-09	8.57E-09
DNASE1L1	-0.263710357	1.01E-09	8.62E-09
TMEM219	-0.263644521	1.02E-09	8.70E-09
SCN1B	-0.263580404	1.03E-09	8.78E-09
PLA2G15	-0.263520947	1.04E-09	8.86E-09
SLC38A10	-0.263479481	1.05E-09	8.90E-09
KCTD21	-0.263441731	1.05E-09	8.95E-09
LAPTM4A	-0.263126136	1.10E-09	9.37E-09
KIAA0319L	-0.263105509	1.11E-09	9.39E-09
THSD1	-0.263047558	1.12E-09	9.46E-09
RNF122	-0.262766703	1.17E-09	9.85E-09
PLXDC1	-0.262750465	1.17E-09	9.87E-09
C19orf33	-0.262568602	1.20E-09	1.01E-08
GUCA1A	-0.262514399	1.21E-09	1.02E-08
FANK1	-0.262510531	1.21E-09	1.02E-08
PRNP	-0.26240607	1.23E-09	1.04E-08
S100A10	-0.262245811	1.26E-09	1.06E-08
MRGPRF	-0.261768717	1.35E-09	1.13E-08
RING1	-0.261679415	1.37E-09	1.15E-08
MAGED2	-0.261658474	1.38E-09	1.15E-08
MLLT11	-0.261520749	1.40E-09	1.17E-08
FAM3A	-0.261193675	1.47E-09	1.23E-08
IL1F5	-0.261118742	1.49E-09	1.24E-08
NPC2	-0.261112113	1.49E-09	1.24E-08
ARHGAP17	-0.260806198	1.56E-09	1.30E-08
C19orf26	-0.260759839	1.57E-09	1.31E-08
TRPC4AP	-0.260749008	1.58E-09	1.31E-08
SLC24A6	-0.260734365	1.58E-09	1.31E-08
AKT1S1	-0.26067697	1.59E-09	1.32E-08
RSPH9	-0.26067056	1.59E-09	1.32E-08
GPR78	-0.260655234	1.60E-09	1.32E-08
CGB1	-0.2603622	1.67E-09	1.38E-08
ZFYVE1	-0.260277325	1.69E-09	1.40E-08
CYP4F22	-0.260256263	1.70E-09	1.40E-08
RAPSN	-0.260143747	1.72E-09	1.42E-08
CTSD	-0.259868778	1.80E-09	1.48E-08
SHC1	-0.259576929	1.87E-09	1.54E-08
WFS1	-0.259528368	1.89E-09	1.55E-08
LOC400931	-0.259495622	1.90E-09	1.56E-08
NCRNA00160	-0.259484293	1.90E-09	1.56E-08
C1orf68	-0.259425002	1.92E-09	1.57E-08
NDN	-0.259423987	1.92E-09	1.57E-08
MAEA	-0.259417426	1.92E-09	1.57E-08
CENPT	-0.259347999	1.94E-09	1.59E-08
GLYAT	-0.25912862	2.00E-09	1.64E-08
SPARC	-0.258788057	2.11E-09	1.72E-08
IL1RL1	-0.258778589	2.11E-09	1.72E-08
MAN2C1	-0.258676106	2.14E-09	1.74E-08
C11orf73	-0.258497797	2.20E-09	1.79E-08
IL20	-0.258458501	2.21E-09	1.80E-08
PSMB5	-0.258404783	2.23E-09	1.81E-08
SPRR2E	-0.258386444	2.23E-09	1.81E-08
CCBP2	-0.258373109	2.24E-09	1.82E-08
ADAMTSL4	-0.258294155	2.26E-09	1.84E-08
ATP6V1H	-0.258113061	2.33E-09	1.89E-08
ATP8B5P	-0.257995915	2.37E-09	1.92E-08
HIST1H2BC	-0.257956683	2.38E-09	1.93E-08
FABP4	-0.257915259	2.39E-09	1.94E-08
MAFK	-0.257880205	2.41E-09	1.95E-08
TIMP2	-0.257858874	2.41E-09	1.95E-08
CHMP6	-0.257810783	2.43E-09	1.96E-08
ZBTB47	-0.257792588	2.44E-09	1.97E-08
NCCRP1	-0.257648895	2.49E-09	2.01E-08
C1QTNF6	-0.257646613	2.49E-09	2.01E-08
ADARB1	-0.257575686	2.52E-09	2.03E-08
AATK	-0.257558837	2.52E-09	2.03E-08
MAPRE3	-0.257454082	2.56E-09	2.06E-08
CC2D1B	-0.257438758	2.57E-09	2.06E-08
SRPK3	-0.25739018	2.59E-09	2.08E-08
SRPX	-0.257158915	2.68E-09	2.14E-08
ACAP3	-0.256873647	2.79E-09	2.23E-08
NOX4	-0.256768253	2.83E-09	2.26E-08
FAM108A1	-0.256703871	2.86E-09	2.28E-08
NCRNA00152	-0.256499291	2.95E-09	2.35E-08
LRRC17	-0.256433405	2.97E-09	2.37E-08
TREM1	-0.256291841	3.04E-09	2.41E-08
ZFAND2B	-0.256233146	3.06E-09	2.43E-08
WNT7A	-0.256070202	3.14E-09	2.49E-08
PMP22	-0.256066933	3.14E-09	2.49E-08
C1QTNF1	-0.256005955	3.17E-09	2.51E-08
GTF2H5	-0.255901814	3.21E-09	2.54E-08
SIRT3	-0.255801983	3.26E-09	2.58E-08
LAD1	-0.255800794	3.26E-09	2.58E-08
HGS	-0.255776689	3.27E-09	2.59E-08
HCFC1R1	-0.255725765	3.30E-09	2.60E-08
COL6A1	-0.25566325	3.33E-09	2.63E-08
C19orf12	-0.255586543	3.36E-09	2.65E-08
SYNPO2L	-0.255516835	3.40E-09	2.68E-08
AQP10	-0.255504955	3.41E-09	2.68E-08
ZNF688	-0.255318546	3.50E-09	2.75E-08
ZNF259	-0.255058818	3.63E-09	2.85E-08
ARL2	-0.255054988	3.63E-09	2.85E-08
SLC27A4	-0.255044176	3.64E-09	2.86E-08
THBS2	-0.254985971	3.67E-09	2.88E-08
MARCKS	-0.254893262	3.72E-09	2.91E-08
TMEM57	-0.25486322	3.74E-09	2.93E-08
NIPAL4	-0.254636861	3.86E-09	3.02E-08
NSMCE1	-0.254579212	3.89E-09	3.04E-08
EXOSC4	-0.254481919	3.95E-09	3.08E-08
UBL5	-0.254479386	3.95E-09	3.08E-08
ZFPM1	-0.254435695	3.98E-09	3.10E-08
C19orf22	-0.254346479	4.03E-09	3.14E-08
RNF39	-0.254311444	4.05E-09	3.15E-08
ARHGDIG	-0.25429268	4.06E-09	3.16E-08
EFR3B	-0.254234214	4.09E-09	3.18E-08
GPR172A	-0.254102342	4.17E-09	3.24E-08
ITFG3	-0.254068486	4.19E-09	3.26E-08
KLF10	-0.25403772	4.21E-09	3.27E-08
ALDH3B2	-0.253985351	4.24E-09	3.29E-08
FIBIN	-0.25380736	4.35E-09	3.37E-08
FKBP1A	-0.253781177	4.37E-09	3.38E-08
PHYH	-0.253770727	4.38E-09	3.39E-08
PRKCZ	-0.253731559	4.40E-09	3.41E-08
KCTD10	-0.253616383	4.48E-09	3.46E-08
TRIML1	-0.253504101	4.55E-09	3.52E-08
TAF10	-0.253466129	4.57E-09	3.53E-08
IER3	-0.253386193	4.63E-09	3.57E-08
ZSWIM7	-0.253268184	4.71E-09	3.63E-08
EIF6	-0.253239599	4.72E-09	3.64E-08
SPSB3	-0.252906422	4.96E-09	3.81E-08
ETHE1	-0.252794952	5.04E-09	3.87E-08
PALMD	-0.252791426	5.04E-09	3.87E-08
VPS18	-0.252725418	5.09E-09	3.90E-08
PQLC1	-0.25268274	5.12E-09	3.93E-08
TCEB2	-0.252538445	5.23E-09	4.00E-08
TSSC4	-0.252473034	5.27E-09	4.04E-08
UBE2QL1	-0.252462942	5.28E-09	4.04E-08
PSG9	-0.252390771	5.34E-09	4.08E-08
SARS	-0.252377225	5.35E-09	4.09E-08
HEATR7A	-0.252356694	5.36E-09	4.10E-08
ELFN1	-0.252112376	5.55E-09	4.24E-08
MYO18B	-0.252101535	5.56E-09	4.24E-08
UBE2E2	-0.252092955	5.57E-09	4.25E-08
PYCARD	-0.252056369	5.60E-09	4.27E-08
HAS1	-0.252010272	5.64E-09	4.29E-08
ABTB1	-0.251944568	5.69E-09	4.33E-08
SESN3	-0.251901672	5.72E-09	4.36E-08
ARHGDIA	-0.2518388	5.78E-09	4.39E-08
PLA2G2F	-0.251801724	5.81E-09	4.41E-08
FTH1	-0.251663152	5.92E-09	4.50E-08
CPZ	-0.251567924	6.00E-09	4.55E-08
ACSBG1	-0.251407301	6.14E-09	4.65E-08
VAMP2	-0.251385992	6.16E-09	4.66E-08
C15orf17	-0.251297613	6.24E-09	4.72E-08
DDRGK1	-0.251286705	6.25E-09	4.73E-08
TP53TG1	-0.251222963	6.31E-09	4.77E-08
EGFL7	-0.251173458	6.35E-09	4.80E-08
HIST1H4H	-0.251146591	6.38E-09	4.81E-08
TNNI2	-0.251058404	6.46E-09	4.87E-08
THY1	-0.250987697	6.52E-09	4.92E-08
DNAJC4	-0.250781799	6.72E-09	5.05E-08
NAV3	-0.250688102	6.81E-09	5.12E-08
TM6SF2	-0.250683724	6.81E-09	5.12E-08
PSD	-0.250651927	6.84E-09	5.14E-08
WFDC1	-0.25063705	6.86E-09	5.15E-08
C1orf89	-0.250622339	6.87E-09	5.15E-08
ARSE	-0.250584964	6.91E-09	5.18E-08
PSORS1C1	-0.250565306	6.93E-09	5.19E-08
PVRL2	-0.250316765	7.18E-09	5.37E-08
ZNF323	-0.250187154	7.31E-09	5.46E-08
TMEM115	-0.250127355	7.37E-09	5.51E-08
AZGP1	-0.25011538	7.38E-09	5.51E-08
ARMCX1	-0.250106109	7.39E-09	5.52E-08
PTRF	-0.250044742	7.46E-09	5.56E-08
C6orf218	-0.250013414	7.49E-09	5.59E-08
IFI27	-0.250005163	7.50E-09	5.59E-08
FLYWCH2	-0.249723587	7.81E-09	5.80E-08
PLEKHM1	-0.249697701	7.84E-09	5.82E-08
RCAN1	-0.249594893	7.95E-09	5.90E-08
ARSI	-0.249588151	7.96E-09	5.90E-08
HIST1H2BG	-0.24938228	8.19E-09	6.07E-08
B3GAT3	-0.249290706	8.30E-09	6.14E-08
GRIN3B	-0.249276158	8.32E-09	6.15E-08
ZNF365	-0.249236422	8.36E-09	6.19E-08
TH	-0.249194194	8.41E-09	6.22E-08
C11orf24	-0.249011381	8.63E-09	6.37E-08
CRLF1	-0.248926069	8.74E-09	6.43E-08
ALS2CL	-0.248899777	8.77E-09	6.46E-08
GTF3C1	-0.248803051	8.89E-09	6.53E-08
TMEM40	-0.248788745	8.91E-09	6.55E-08
LOC100144603	-0.248705716	9.02E-09	6.62E-08
CAMK2N1	-0.248615033	9.13E-09	6.70E-08
SBDS	-0.24852556	9.25E-09	6.77E-08
BMP1	-0.248427441	9.38E-09	6.86E-08
NGFRAP1	-0.248362953	9.46E-09	6.92E-08
HIST1H2AE	-0.248354845	9.47E-09	6.93E-08
S100A8	-0.248268104	9.59E-09	7.01E-08
SLC6A7	-0.248223203	9.65E-09	7.05E-08
ZNF491	-0.248202983	9.68E-09	7.07E-08
DEGS1	-0.248110196	9.81E-09	7.15E-08
NAALADL1	-0.248069509	9.86E-09	7.18E-08
ZNF706	-0.247994598	9.97E-09	7.25E-08
CASP14	-0.247982844	9.98E-09	7.26E-08
FGF5	-0.247925377	1.01E-08	7.32E-08
SIRT7	-0.247809833	1.02E-08	7.43E-08
CCDC64B	-0.247698598	1.04E-08	7.54E-08
C10orf99	-0.247594319	1.05E-08	7.65E-08
TGFBI	-0.24758061	1.06E-08	7.66E-08
CTSK	-0.247539864	1.06E-08	7.70E-08
EVI5L	-0.247424318	1.08E-08	7.81E-08
DBC1	-0.247352351	1.09E-08	7.89E-08
SLC19A2	-0.247320588	1.10E-08	7.92E-08
C11orf59	-0.247238541	1.11E-08	8.00E-08
FLJ36031	-0.247186588	1.12E-08	8.06E-08
EN1	-0.247059223	1.14E-08	8.19E-08
RFNG	-0.247030253	1.14E-08	8.22E-08
PEX16	-0.246948238	1.15E-08	8.31E-08
DACT3	-0.246947587	1.15E-08	8.31E-08
FAM167B	-0.24689173	1.16E-08	8.36E-08
MICALL1	-0.246836325	1.17E-08	8.43E-08
KLK11	-0.246799089	1.18E-08	8.47E-08
ST8SIA2	-0.246688195	1.20E-08	8.59E-08
ACVR1	-0.246441012	1.24E-08	8.89E-08
TPT1	-0.246430312	1.24E-08	8.90E-08
FASTK	-0.246385837	1.25E-08	8.95E-08
LIMS3-LOC440895	-0.246377527	1.25E-08	8.96E-08
KCP	-0.246366341	1.25E-08	8.97E-08
RGS11	-0.246337687	1.26E-08	8.99E-08
TRIM63	-0.246280625	1.27E-08	9.06E-08
GYS1	-0.246253687	1.27E-08	9.09E-08
OPTN	-0.246191236	1.28E-08	9.16E-08
MYL3	-0.246091356	1.30E-08	9.28E-08
SLC38A3	-0.246082748	1.30E-08	9.29E-08
CGB2	-0.246059848	1.31E-08	9.31E-08
SPRYD3	-0.245887161	1.34E-08	9.52E-08
AEBP1	-0.245861366	1.34E-08	9.55E-08
CAMK2A	-0.245796984	1.36E-08	9.63E-08
SNX33	-0.245765599	1.36E-08	9.67E-08
STK17A	-0.245721845	1.37E-08	9.72E-08
TMEM120A	-0.245499619	1.41E-08	1.00E-07
INHBB	-0.245424053	1.43E-08	1.01E-07
CDC42EP5	-0.245370996	1.44E-08	1.02E-07
S100A3	-0.245282777	1.46E-08	1.03E-07
PGLS	-0.245273671	1.46E-08	1.03E-07
TWF2	-0.245212032	1.47E-08	1.04E-07
ANKFN1	-0.245193543	1.47E-08	1.04E-07
C17orf106	-0.245173131	1.48E-08	1.04E-07
CHMP1A	-0.24513958	1.49E-08	1.05E-07
GPR153	-0.245038309	1.51E-08	1.06E-07
RNF11	-0.245032115	1.51E-08	1.06E-07
COPS7A	-0.24502747	1.51E-08	1.06E-07
CTGF	-0.244876657	1.54E-08	1.08E-07
MFSD5	-0.244825855	1.55E-08	1.09E-07
LOC728264	-0.244795687	1.56E-08	1.10E-07
DAD1	-0.244710246	1.58E-08	1.11E-07
NUDT16L1	-0.244670204	1.59E-08	1.11E-07
LHB	-0.244649327	1.59E-08	1.12E-07
HSPA12A	-0.244468297	1.63E-08	1.14E-07
ADD1	-0.244388334	1.65E-08	1.16E-07
DCUN1D3	-0.244386937	1.65E-08	1.16E-07
B4GALT7	-0.244340925	1.66E-08	1.16E-07
WNT6	-0.244303134	1.67E-08	1.17E-07
CRELD1	-0.24430043	1.67E-08	1.17E-07
CNGA1	-0.244292819	1.67E-08	1.17E-07
MOCS1	-0.244257663	1.68E-08	1.17E-07
MME	-0.244170782	1.70E-08	1.19E-07
C1orf85	-0.244169619	1.70E-08	1.19E-07
EHD2	-0.244166654	1.70E-08	1.19E-07
KIAA0427	-0.24407852	1.72E-08	1.20E-07
HIST2H2BE	-0.244005818	1.74E-08	1.21E-07
S100A9	-0.243966527	1.75E-08	1.22E-07
GAS7	-0.243879125	1.77E-08	1.23E-07
SUMF2	-0.243829896	1.78E-08	1.24E-07
ANKRD1	-0.24382486	1.78E-08	1.24E-07
DEFB1	-0.243767367	1.80E-08	1.25E-07
KIAA1644	-0.243728615	1.81E-08	1.26E-07
C2orf81	-0.243408383	1.89E-08	1.31E-07
MUL1	-0.243346604	1.90E-08	1.32E-07
C8orf58	-0.243270861	1.92E-08	1.33E-07
SEMA6B	-0.243211953	1.94E-08	1.34E-07
PDGFB	-0.243128966	1.96E-08	1.36E-07
FEZ2	-0.243055431	1.98E-08	1.37E-07
C2orf24	-0.243041611	1.99E-08	1.37E-07
HMGCL	-0.242937449	2.01E-08	1.39E-07
RNF215	-0.242912838	2.02E-08	1.40E-07
IFI27L2	-0.242879591	2.03E-08	1.40E-07
TSG101	-0.242861135	2.04E-08	1.41E-07
DNAJB5	-0.242849731	2.04E-08	1.41E-07
PPP1R13L	-0.242837245	2.04E-08	1.41E-07
HIC1	-0.242820491	2.05E-08	1.41E-07
ZNHIT1	-0.242693744	2.08E-08	1.44E-07
ZNF117	-0.24251912	2.13E-08	1.47E-07
NDUFB2	-0.242479808	2.15E-08	1.48E-07
CDIPT	-0.242440096	2.16E-08	1.48E-07
AREG	-0.242402076	2.17E-08	1.49E-07
C16orf57	-0.24232909	2.19E-08	1.51E-07
MC1R	-0.242270401	2.21E-08	1.52E-07
ATP6V0B	-0.242225984	2.22E-08	1.53E-07
OR10A6	-0.242203751	2.23E-08	1.53E-07
TGFB1I1	-0.242181184	2.23E-08	1.53E-07
C20orf141	-0.242125213	2.25E-08	1.54E-07
SMARCD3	-0.242059004	2.27E-08	1.56E-07
DCAF5	-0.242037902	2.28E-08	1.56E-07
SGCA	-0.24198159	2.30E-08	1.57E-07
FAM176A	-0.24197757	2.30E-08	1.57E-07
COL5A2	-0.241882156	2.33E-08	1.59E-07
IL17RE	-0.241770152	2.36E-08	1.62E-07
FAM116B	-0.241664367	2.40E-08	1.64E-07
C1orf86	-0.241647171	2.40E-08	1.64E-07
HBEGF	-0.241414012	2.48E-08	1.69E-07
KLK12	-0.241176271	2.56E-08	1.74E-07
CKAP4	-0.241148943	2.57E-08	1.75E-07
RABGGTA	-0.241099832	2.59E-08	1.76E-07
TMEM117	-0.241085176	2.60E-08	1.76E-07
UBE2Q2	-0.241060473	2.61E-08	1.77E-07
TMEM126A	-0.241007352	2.62E-08	1.78E-07
SAPS2	-0.24098799	2.63E-08	1.78E-07
STON2	-0.240952898	2.64E-08	1.79E-07
SPINT2	-0.240890873	2.67E-08	1.80E-07
A2BP1	-0.240602847	2.77E-08	1.87E-07
CNN1	-0.24052237	2.80E-08	1.89E-07
DULLARD	-0.240508314	2.81E-08	1.89E-07
LASS3	-0.240417295	2.84E-08	1.92E-07
CDC37	-0.240410371	2.85E-08	1.92E-07
LFNG	-0.240379216	2.86E-08	1.93E-07
CPT1C	-0.240378154	2.86E-08	1.93E-07
RPS6KB2	-0.240361511	2.87E-08	1.93E-07
EPO	-0.240320401	2.88E-08	1.94E-07
PPT2	-0.240286216	2.90E-08	1.95E-07
BRE	-0.240273058	2.90E-08	1.95E-07
PLAC9	-0.240047516	2.99E-08	2.01E-07
GSN	-0.240005329	3.01E-08	2.02E-07
SDHAF2	-0.239806034	3.09E-08	2.07E-07
CCK	-0.23978463	3.10E-08	2.08E-07
FADS3	-0.23975949	3.11E-08	2.08E-07
FBXL8	-0.23973769	3.12E-08	2.09E-07
PMM1	-0.239707717	3.13E-08	2.09E-07
TMEM59	-0.23963884	3.16E-08	2.11E-07
PTK7	-0.239626886	3.17E-08	2.11E-07
IL13RA1	-0.239589746	3.18E-08	2.12E-07
RCVRN	-0.239567496	3.19E-08	2.13E-07
TMEM222	-0.239552023	3.20E-08	2.13E-07
SLN	-0.239498909	3.22E-08	2.15E-07
TFEB	-0.239367905	3.28E-08	2.19E-07
KIF26B	-0.239321244	3.30E-08	2.20E-07
C1orf105	-0.239310088	3.31E-08	2.20E-07
USP35	-0.239203351	3.35E-08	2.23E-07
GPSM1	-0.239183035	3.36E-08	2.24E-07
MYO3B	-0.239167741	3.37E-08	2.24E-07
FLJ45983	-0.239130823	3.39E-08	2.25E-07
LIMCH1	-0.239083679	3.41E-08	2.26E-07
PCDHB5	-0.239023643	3.44E-08	2.28E-07
MAP3K11	-0.238962029	3.46E-08	2.30E-07
TMEM59L	-0.23894254	3.47E-08	2.30E-07
HIGD1B	-0.238573749	3.65E-08	2.41E-07
FAM70B	-0.238570136	3.65E-08	2.42E-07
NEU2	-0.238320129	3.78E-08	2.50E-07
FBRS	-0.238163157	3.86E-08	2.55E-07
COL1A1	-0.238147416	3.87E-08	2.55E-07
C16orf45	-0.237932201	3.98E-08	2.62E-07
DYSF	-0.237897669	4.00E-08	2.64E-07
CAPNS2	-0.237868642	4.02E-08	2.64E-07
EDNRA	-0.237802788	4.05E-08	2.67E-07
TP53RK	-0.237794016	4.06E-08	2.67E-07
SGIP1	-0.237777429	4.06E-08	2.67E-07
TCTEX1D1	-0.237746956	4.08E-08	2.68E-07
ANKK1	-0.237739116	4.09E-08	2.68E-07
C11orf71	-0.237661853	4.13E-08	2.71E-07
ZNHIT2	-0.237648802	4.14E-08	2.71E-07
GGN	-0.237615552	4.15E-08	2.73E-07
PCSK7	-0.237462849	4.24E-08	2.78E-07
INCA1	-0.237443376	4.25E-08	2.78E-07
RNF25	-0.237391963	4.28E-08	2.80E-07
CYB561D2	-0.237381368	4.29E-08	2.81E-07
FAM89A	-0.23726328	4.36E-08	2.85E-07
VPS4A	-0.237208494	4.39E-08	2.86E-07
C10orf26	-0.237103824	4.45E-08	2.90E-07
MFAP5	-0.236962811	4.53E-08	2.96E-07
SUGT1	-0.236843264	4.61E-08	3.00E-07
MED15	-0.236791551	4.64E-08	3.02E-07
SNAPC2	-0.236739539	4.67E-08	3.04E-07
CLCN1	-0.236655371	4.73E-08	3.07E-07
WDR45	-0.236646167	4.73E-08	3.08E-07
SNRPN	-0.236613322	4.75E-08	3.09E-07
SPAG7	-0.236587734	4.77E-08	3.10E-07
CYS1	-0.236570328	4.78E-08	3.10E-07
TREX2	-0.236467196	4.85E-08	3.14E-07
INPP5K	-0.236333653	4.93E-08	3.20E-07
ACTR10	-0.236255746	4.98E-08	3.23E-07
YPEL4	-0.236235798	5.00E-08	3.24E-07
PTPRN	-0.236224358	5.01E-08	3.24E-07
FDX1	-0.236159776	5.05E-08	3.27E-07
SULF2	-0.236131636	5.07E-08	3.28E-07
LOC388789	-0.236095508	5.09E-08	3.29E-07
WDR1	-0.236090327	5.10E-08	3.29E-07
RAB1B	-0.236060755	5.12E-08	3.31E-07
RNF10	-0.236043579	5.13E-08	3.31E-07
S100A6	-0.236014335	5.15E-08	3.32E-07
SAMD14	-0.23594886	5.19E-08	3.35E-07
IGFBP6	-0.235837716	5.27E-08	3.40E-07
C13orf29	-0.235806234	5.29E-08	3.41E-07
HOXD9	-0.235716831	5.36E-08	3.45E-07
ALOXE3	-0.235703006	5.37E-08	3.45E-07
CLCF1	-0.235608796	5.43E-08	3.49E-07
RBM24	-0.235561425	5.47E-08	3.52E-07
SERPINE1	-0.235495006	5.52E-08	3.54E-07
SFTA1P	-0.235486608	5.52E-08	3.55E-07
CHST2	-0.235457428	5.54E-08	3.56E-07
RHOG	-0.235378202	5.60E-08	3.59E-07
YIPF1	-0.23531543	5.65E-08	3.62E-07
SPNS1	-0.235205021	5.73E-08	3.67E-07
FCRLB	-0.235048796	5.85E-08	3.75E-07
FAM133A	-0.235020262	5.88E-08	3.76E-07
SNTA1	-0.234965548	5.92E-08	3.79E-07
SLC3A2	-0.234927196	5.95E-08	3.80E-07
EGFL8	-0.234809833	6.04E-08	3.86E-07
LRSAM1	-0.234751839	6.09E-08	3.89E-07
HOPX	-0.234724954	6.11E-08	3.90E-07
DGAT2	-0.234683946	6.14E-08	3.92E-07
ABCA12	-0.234602159	6.21E-08	3.96E-07
DUSP23	-0.234560036	6.25E-08	3.98E-07
S100A1	-0.234547486	6.26E-08	3.98E-07
IFI6	-0.234518303	6.28E-08	4.00E-07
SOHLH2	-0.234505614	6.29E-08	4.00E-07
SLC22A3	-0.234485014	6.31E-08	4.01E-07
NANOS3	-0.23448455	6.31E-08	4.01E-07
BRMS1	-0.234443354	6.34E-08	4.03E-07
MAN1B1	-0.234373911	6.40E-08	4.06E-07
PALM	-0.234361175	6.41E-08	4.07E-07
TNNT1	-0.234313681	6.45E-08	4.09E-07
TMEM50A	-0.234300392	6.47E-08	4.10E-07
HIST1H2BD	-0.234253662	6.51E-08	4.12E-07
GLDN	-0.234148304	6.60E-08	4.17E-07
ACTG2	-0.234112908	6.63E-08	4.19E-07
C19orf10	-0.234063659	6.67E-08	4.22E-07
UBE2E3	-0.234008549	6.72E-08	4.24E-07
OBP2A	-0.233983346	6.74E-08	4.26E-07
TUBB6	-0.233950024	6.77E-08	4.27E-07
KIAA1609	-0.233768017	6.94E-08	4.36E-07
ZFAND2A	-0.233758538	6.95E-08	4.36E-07
SH3GL1	-0.233666264	7.03E-08	4.41E-07
GRP	-0.233467535	7.22E-08	4.53E-07
GNB2	-0.233458617	7.23E-08	4.53E-07
TLL1	-0.233458027	7.23E-08	4.53E-07
ZP1	-0.233393923	7.29E-08	4.57E-07
C20orf195	-0.233266476	7.41E-08	4.64E-07
GLIPR2	-0.233044497	7.63E-08	4.77E-07
KLK10	-0.232984667	7.69E-08	4.81E-07
S100A14	-0.232909313	7.77E-08	4.85E-07
PLB1	-0.232849848	7.83E-08	4.89E-07
YIF1B	-0.232769415	7.91E-08	4.94E-07
PRSS8	-0.232750194	7.93E-08	4.95E-07
EREG	-0.232686166	8.00E-08	4.99E-07
FAM83A	-0.232588894	8.10E-08	5.05E-07
NDUFC2	-0.232585598	8.11E-08	5.05E-07
SPRR1A	-0.232550821	8.14E-08	5.07E-07
ABLIM3	-0.232546089	8.15E-08	5.07E-07
CYP27C1	-0.232531751	8.16E-08	5.08E-07
C1orf91	-0.232371656	8.34E-08	5.18E-07
DYNLT3	-0.232222128	8.50E-08	5.28E-07
C20orf46	-0.232096118	8.64E-08	5.36E-07
TBRG1	-0.231948186	8.81E-08	5.46E-07
TMEM53	-0.231896822	8.87E-08	5.50E-07
ACER1	-0.23184754	8.93E-08	5.53E-07
ST14	-0.231794929	8.99E-08	5.57E-07
TRIM55	-0.231599853	9.22E-08	5.70E-07
AMDHD2	-0.231570995	9.26E-08	5.72E-07
PDE2A	-0.23149105	9.36E-08	5.78E-07
SEPT4	-0.231465288	9.39E-08	5.80E-07
ASAP3	-0.23119591	9.72E-08	5.99E-07
TEKT4	-0.231098927	9.85E-08	6.06E-07
CORIN	-0.231092831	9.86E-08	6.07E-07
C6orf141	-0.231084119	9.87E-08	6.07E-07
P4HA3	-0.231083411	9.87E-08	6.07E-07
ZFAND3	-0.230892722	1.01E-07	6.21E-07
TTLL13	-0.230892512	1.01E-07	6.21E-07
PTOV1	-0.230891583	1.01E-07	6.21E-07
ARHGAP1	-0.230774603	1.03E-07	6.30E-07
RPLP0P2	-0.230395377	1.08E-07	6.61E-07
TNN	-0.230390676	1.08E-07	6.61E-07
OCIAD2	-0.230378267	1.08E-07	6.62E-07
COL5A1	-0.230343868	1.09E-07	6.64E-07
DAGLB	-0.230309642	1.09E-07	6.67E-07
MYOZ3	-0.230268596	1.10E-07	6.70E-07
C14orf119	-0.230251674	1.10E-07	6.71E-07
TMEM159	-0.230246932	1.10E-07	6.71E-07
ACOX3	-0.230186338	1.11E-07	6.77E-07
MSC	-0.23009262	1.12E-07	6.84E-07
NTAN1	-0.229913385	1.15E-07	6.99E-07
ROM1	-0.229905125	1.15E-07	7.00E-07
TPPP3	-0.229691622	1.18E-07	7.18E-07
HDAC5	-0.229691412	1.18E-07	7.18E-07
SMPDL3A	-0.229671917	1.19E-07	7.20E-07
LRP10	-0.229585697	1.20E-07	7.28E-07
TRIM29	-0.229521978	1.21E-07	7.33E-07
OAZ3	-0.229499544	1.21E-07	7.35E-07
RAB22A	-0.229385964	1.23E-07	7.45E-07
ATPIF1	-0.229347966	1.24E-07	7.48E-07
C14orf153	-0.229343413	1.24E-07	7.48E-07
PSAPL1	-0.22923929	1.25E-07	7.58E-07
GNA15	-0.229233659	1.26E-07	7.58E-07
RAP1GAP	-0.229214421	1.26E-07	7.60E-07
SIAH1	-0.229137882	1.27E-07	7.67E-07
DGAT1	-0.229092541	1.28E-07	7.71E-07
C9orf169	-0.229018305	1.29E-07	7.78E-07
SPEG	-0.229005205	1.29E-07	7.79E-07
FLG2	-0.228868696	1.32E-07	7.93E-07
CRYBA2	-0.22885619	1.32E-07	7.94E-07
EMX2	-0.228815548	1.32E-07	7.98E-07
DYSFIP1	-0.22876237	1.33E-07	8.03E-07
DHRS1	-0.228631024	1.36E-07	8.16E-07
MAGED1	-0.228507399	1.38E-07	8.28E-07
CDKN2B	-0.228493141	1.38E-07	8.29E-07
TMEM175	-0.228472284	1.38E-07	8.31E-07
APRT	-0.228361575	1.40E-07	8.42E-07
LMNA	-0.228203139	1.43E-07	8.58E-07
PLEKHF1	-0.228020014	1.47E-07	8.77E-07
DCBLD1	-0.227999265	1.47E-07	8.79E-07
MGLL	-0.227954156	1.48E-07	8.84E-07
C11orf87	-0.227949173	1.48E-07	8.84E-07
DECR2	-0.227934025	1.48E-07	8.85E-07
SH3RF3	-0.227712974	1.53E-07	9.10E-07
LEMD2	-0.227704677	1.53E-07	9.10E-07
FAM38A	-0.227689765	1.53E-07	9.12E-07
COMT	-0.227667819	1.54E-07	9.14E-07
TSTA3	-0.227645178	1.54E-07	9.16E-07
JAM3	-0.227631338	1.54E-07	9.18E-07
MAGEL2	-0.227599172	1.55E-07	9.21E-07
COMMD6	-0.227494978	1.57E-07	9.34E-07
GRINA	-0.227431321	1.58E-07	9.40E-07
CHST1	-0.227274809	1.62E-07	9.59E-07
RFX8	-0.227242308	1.62E-07	9.62E-07
TMCC2	-0.227122479	1.65E-07	9.76E-07
METTL11B	-0.227109028	1.65E-07	9.77E-07
TOMM7	-0.22700991	1.67E-07	9.89E-07
PLCD1	-0.226920716	1.69E-07	1.00E-06
TYMP	-0.226915819	1.69E-07	1.00E-06
NDRG4	-0.226869531	1.70E-07	1.01E-06
CLSTN2	-0.226640276	1.75E-07	1.04E-06
PLEKHG5	-0.226629969	1.75E-07	1.04E-06
KCNC4	-0.226564249	1.77E-07	1.04E-06
GAST	-0.226562514	1.77E-07	1.04E-06
ISLR	-0.226321526	1.82E-07	1.07E-06
LOC283404	-0.226248086	1.84E-07	1.08E-06
LHX5	-0.226172875	1.86E-07	1.09E-06
PPPDE2	-0.225920936	1.92E-07	1.13E-06
LIN37	-0.22587998	1.93E-07	1.13E-06
TMEM158	-0.225849446	1.94E-07	1.14E-06
NEDD8	-0.225839181	1.94E-07	1.14E-06
C5orf27	-0.225689853	1.98E-07	1.16E-06
SLC35C1	-0.225525404	2.02E-07	1.18E-06
PPP1R14B	-0.225489598	2.03E-07	1.19E-06
MYLPF	-0.22545412	2.04E-07	1.19E-06
ID3	-0.225321316	2.07E-07	1.21E-06
ACYP2	-0.225211627	2.10E-07	1.23E-06
FAM180A	-0.225146385	2.12E-07	1.24E-06
FCER1A	-0.224915574	2.18E-07	1.27E-06
CCDC48	-0.224730691	2.23E-07	1.30E-06
NAGLU	-0.224676222	2.25E-07	1.31E-06
PRKAG3	-0.224603316	2.27E-07	1.32E-06
PGRMC2	-0.22456179	2.28E-07	1.33E-06
CALD1	-0.224526294	2.29E-07	1.33E-06
KCTD4	-0.224518336	2.30E-07	1.33E-06
ULBP2	-0.224476714	2.31E-07	1.34E-06
SFXN3	-0.224448842	2.32E-07	1.34E-06
LOC401397	-0.224423533	2.32E-07	1.35E-06
EXOC3L	-0.224406175	2.33E-07	1.35E-06
KDELR3	-0.224378237	2.34E-07	1.35E-06
SERPINA12	-0.224347354	2.35E-07	1.36E-06
INHA	-0.224327083	2.35E-07	1.36E-06
FAM177A1	-0.224276016	2.37E-07	1.37E-06
MAP2	-0.224230039	2.38E-07	1.38E-06
COL1A2	-0.224031297	2.44E-07	1.41E-06
ARL4D	-0.224007775	2.45E-07	1.41E-06
RNPEPL1	-0.223990976	2.45E-07	1.41E-06
RABGEF1	-0.223979104	2.46E-07	1.41E-06
LOR	-0.223874592	2.49E-07	1.43E-06
NEGR1	-0.223862247	2.49E-07	1.43E-06
HCG4	-0.223773027	2.52E-07	1.45E-06
LSM10	-0.223738254	2.53E-07	1.45E-06
GATA3	-0.22371742	2.54E-07	1.46E-06
SNX22	-0.223681941	2.55E-07	1.46E-06
EMX2OS	-0.22367119	2.55E-07	1.46E-06
CHMP4A	-0.223655034	2.56E-07	1.47E-06
LOC285205	-0.223652421	2.56E-07	1.47E-06
CDC42EP2	-0.223644807	2.56E-07	1.47E-06
LOC100132288	-0.223577793	2.58E-07	1.48E-06
SYDE1	-0.223530389	2.60E-07	1.49E-06
EXOC3	-0.22352818	2.60E-07	1.49E-06
PGCP	-0.223516039	2.61E-07	1.49E-06
DIO2	-0.223473374	2.62E-07	1.50E-06
NFKBIL1	-0.223339003	2.66E-07	1.52E-06
ACTG1	-0.223328939	2.67E-07	1.52E-06
FKBP7	-0.22329529	2.68E-07	1.53E-06
CYYR1	-0.223214725	2.71E-07	1.54E-06
PCGF3	-0.223184203	2.72E-07	1.55E-06
C21orf82	-0.223117832	2.74E-07	1.56E-06
HECTD3	-0.223084106	2.75E-07	1.56E-06
TCEAL4	-0.223057972	2.76E-07	1.57E-06
MVD	-0.222928595	2.81E-07	1.59E-06
GEFT	-0.222924286	2.81E-07	1.59E-06
CSTB	-0.222875455	2.82E-07	1.60E-06
HRH3	-0.222843512	2.84E-07	1.61E-06
CCDC3	-0.222800053	2.85E-07	1.62E-06
ARL8A	-0.22279159	2.85E-07	1.62E-06
PLAUR	-0.222734661	2.87E-07	1.63E-06
ANXA2	-0.222718855	2.88E-07	1.63E-06
DUSP13	-0.222691698	2.89E-07	1.64E-06
ZNF416	-0.222669216	2.90E-07	1.64E-06
RAET1L	-0.222542594	2.94E-07	1.66E-06
UQCR11	-0.222537132	2.95E-07	1.67E-06
NKPD1	-0.222465723	2.97E-07	1.68E-06
REEP6	-0.222453865	2.98E-07	1.68E-06
PPP1R12C	-0.222353851	3.01E-07	1.70E-06
CKM	-0.222342363	3.02E-07	1.70E-06
RIMBP2	-0.222291929	3.04E-07	1.71E-06
CWC15	-0.222283807	3.04E-07	1.71E-06
PVR	-0.222194898	3.08E-07	1.73E-06
CCDC13	-0.221931628	3.18E-07	1.79E-06
MYT1L	-0.221901344	3.19E-07	1.79E-06
TMEM125	-0.221800248	3.23E-07	1.82E-06
GUCY2C	-0.221712228	3.27E-07	1.83E-06
NMRAL1	-0.221552497	3.33E-07	1.87E-06
C16orf62	-0.221495329	3.36E-07	1.88E-06
CYP8B1	-0.221432721	3.38E-07	1.89E-06
TFPT	-0.221397003	3.40E-07	1.90E-06
RWDD1	-0.221373694	3.41E-07	1.91E-06
BCAP31	-0.221356033	3.42E-07	1.91E-06
HEBP2	-0.221299059	3.44E-07	1.92E-06
C8orf48	-0.221230662	3.47E-07	1.94E-06
PLK2	-0.221207539	3.48E-07	1.94E-06
CXCR1	-0.221141618	3.51E-07	1.96E-06
KRT82	-0.221003548	3.57E-07	1.99E-06
GSTM5	-0.220868472	3.63E-07	2.02E-06
ERGIC3	-0.220855545	3.64E-07	2.03E-06
TNNC2	-0.220848883	3.64E-07	2.03E-06
RBKS	-0.220833792	3.65E-07	2.03E-06
TBC1D22A	-0.22078076	3.67E-07	2.04E-06
FXYD5	-0.220630453	3.74E-07	2.08E-06
DGCR2	-0.220569934	3.77E-07	2.09E-06
CAPN12	-0.22051823	3.79E-07	2.11E-06
C1orf177	-0.220455001	3.82E-07	2.12E-06
BET1L	-0.220427651	3.83E-07	2.13E-06
GJB5	-0.220406187	3.84E-07	2.13E-06
IL17B	-0.220280569	3.90E-07	2.16E-06
TSPO	-0.220109212	3.99E-07	2.21E-06
CCDC9	-0.220104304	3.99E-07	2.21E-06
TMEM147	-0.220054125	4.02E-07	2.22E-06
PEX6	-0.220007854	4.04E-07	2.23E-06
SKIV2L	-0.21997365	4.06E-07	2.24E-06
SLC31A2	-0.219917067	4.09E-07	2.26E-06
PRSS3	-0.219681843	4.21E-07	2.32E-06
SERPINA3	-0.21948563	4.31E-07	2.37E-06
ARHGEF37	-0.219421816	4.34E-07	2.39E-06
MYBPH	-0.21940577	4.35E-07	2.39E-06
TNNI1	-0.219285972	4.42E-07	2.43E-06
C1orf21	-0.219237734	4.44E-07	2.44E-06
PRRX2	-0.219135828	4.50E-07	2.47E-06
KIAA0652	-0.219120518	4.51E-07	2.47E-06
PDGFC	-0.219104756	4.52E-07	2.48E-06
UBE2J2	-0.219066799	4.54E-07	2.49E-06
ACTB	-0.219027425	4.56E-07	2.50E-06
HIGD1A	-0.218880988	4.64E-07	2.54E-06
ABCA4	-0.218842278	4.67E-07	2.56E-06
LASS4	-0.218821497	4.68E-07	2.56E-06
FKBP9	-0.218727035	4.73E-07	2.59E-06
ZNF69	-0.218726101	4.73E-07	2.59E-06
LY6H	-0.218686286	4.76E-07	2.60E-06
C11orf74	-0.218487167	4.87E-07	2.66E-06
EDF1	-0.218480514	4.88E-07	2.66E-06
KRT23	-0.218449725	4.90E-07	2.67E-06
MYOZ1	-0.218397791	4.93E-07	2.69E-06
MEMO1	-0.218370534	4.94E-07	2.69E-06
GADD45A	-0.218325895	4.97E-07	2.71E-06
PLOD1	-0.21826256	5.01E-07	2.73E-06
JUNB	-0.218199865	5.05E-07	2.75E-06
ZNF593	-0.218157269	5.08E-07	2.76E-06
C5orf13	-0.218155951	5.08E-07	2.76E-06
PRSS22	-0.218154951	5.08E-07	2.76E-06
PTHLH	-0.218117494	5.10E-07	2.77E-06
TXNDC17	-0.218088798	5.12E-07	2.78E-06
CALML3	-0.218069958	5.13E-07	2.78E-06
CHRD	-0.218012692	5.17E-07	2.80E-06
MMP11	-0.217986776	5.18E-07	2.81E-06
DHDDS	-0.217966428	5.20E-07	2.82E-06
TRIP10	-0.217963833	5.20E-07	2.82E-06
FAM101B	-0.217787204	5.31E-07	2.88E-06
EEF1D	-0.217598105	5.44E-07	2.94E-06
GLIPR1	-0.217536409	5.48E-07	2.96E-06
MYO7B	-0.217490303	5.51E-07	2.98E-06
VSIG10L	-0.217472844	5.52E-07	2.98E-06
ARF5	-0.217357121	5.60E-07	3.02E-06
ARPC2	-0.217239119	5.68E-07	3.06E-06
HABP4	-0.217213526	5.70E-07	3.07E-06
DKK3	-0.217076881	5.80E-07	3.12E-06
GRIA1	-0.216973104	5.87E-07	3.15E-06
ITPKC	-0.216909844	5.91E-07	3.17E-06
RIN1	-0.216859524	5.95E-07	3.19E-06
ROBO4	-0.216852147	5.96E-07	3.19E-06
THPO	-0.216694589	6.07E-07	3.25E-06
C1orf56	-0.216522792	6.20E-07	3.32E-06
CSRP2	-0.216465048	6.24E-07	3.34E-06
CCRL1	-0.216461138	6.25E-07	3.34E-06
KHDC1L	-0.216443978	6.26E-07	3.35E-06
C17orf61	-0.216281883	6.39E-07	3.41E-06
LMTK3	-0.216271338	6.39E-07	3.41E-06
CHI3L2	-0.216220805	6.43E-07	3.43E-06
IMPA2	-0.216207069	6.44E-07	3.44E-06
LOC134466	-0.21619629	6.45E-07	3.44E-06
AGPAT2	-0.216144493	6.49E-07	3.46E-06
LIPC	-0.215858869	6.72E-07	3.58E-06
MAGEH1	-0.215835363	6.74E-07	3.59E-06
GPR155	-0.215802757	6.77E-07	3.60E-06
IGFBP4	-0.215768103	6.80E-07	3.61E-06
VGLL2	-0.21563271	6.91E-07	3.67E-06
IFFO2	-0.215622164	6.92E-07	3.67E-06
IGSF22	-0.215619957	6.92E-07	3.67E-06
USHBP1	-0.215577121	6.96E-07	3.69E-06
LIMS2	-0.215556578	6.97E-07	3.70E-06
P4HA2	-0.215548513	6.98E-07	3.70E-06
RARRES2	-0.215540737	6.99E-07	3.70E-06
MGST3	-0.215524792	7.00E-07	3.71E-06
DNASE1L2	-0.21551765	7.01E-07	3.71E-06
LENG1	-0.215314276	7.18E-07	3.80E-06
CCDC81	-0.215313074	7.18E-07	3.80E-06
TADA2B	-0.215182936	7.30E-07	3.85E-06
RET	-0.215159847	7.32E-07	3.86E-06
SLC4A8	-0.215135585	7.34E-07	3.87E-06
MGC16121	-0.215075782	7.39E-07	3.90E-06
CTSG	-0.215049076	7.42E-07	3.91E-06
C6orf132	-0.214768597	7.67E-07	4.04E-06
CLCA2	-0.214767099	7.67E-07	4.04E-06
SLC43A2	-0.214717267	7.72E-07	4.07E-06
STK32C	-0.214686505	7.75E-07	4.08E-06
GSTA3	-0.214589489	7.84E-07	4.12E-06
DUSP27	-0.214579418	7.85E-07	4.13E-06
C6orf15	-0.214570679	7.86E-07	4.13E-06
TMEM132A	-0.214563681	7.87E-07	4.13E-06
ZC4H2	-0.214521744	7.91E-07	4.15E-06
LOC100101266	-0.214406218	8.02E-07	4.21E-06
RNF128	-0.214141058	8.28E-07	4.34E-06
CXorf40A	-0.214012723	8.41E-07	4.40E-06
JUN	-0.214002165	8.42E-07	4.40E-06
NEU1	-0.213956724	8.46E-07	4.43E-06
GAK	-0.213911655	8.51E-07	4.45E-06
TUBA4B	-0.213857497	8.57E-07	4.48E-06
RBX1	-0.213850132	8.57E-07	4.48E-06
WNT5B	-0.21383198	8.59E-07	4.49E-06
SEMA3B	-0.213831605	8.59E-07	4.49E-06
PPARD	-0.213719612	8.71E-07	4.54E-06
SLC2A9	-0.213706747	8.72E-07	4.55E-06
RND3	-0.213610791	8.82E-07	4.59E-06
ACOT8	-0.213609502	8.83E-07	4.59E-06
HILS1	-0.213582462	8.85E-07	4.61E-06
BAI1	-0.213568442	8.87E-07	4.61E-06
RNF181	-0.213567949	8.87E-07	4.61E-06
SYT7	-0.213499779	8.94E-07	4.65E-06
MSX1	-0.213444476	9.00E-07	4.68E-06
ATG9A	-0.213424746	9.02E-07	4.69E-06
LOC90110	-0.213422103	9.03E-07	4.69E-06
TRAPPC2L	-0.213405719	9.04E-07	4.69E-06
BEST3	-0.213363128	9.09E-07	4.72E-06
DYNLRB1	-0.213344428	9.11E-07	4.73E-06
TRIM62	-0.213334665	9.12E-07	4.73E-06
FTHL3	-0.213300804	9.16E-07	4.75E-06
TNNT3	-0.213257784	9.21E-07	4.77E-06
GYLTL1B	-0.213249943	9.21E-07	4.78E-06
S100A2	-0.213225402	9.24E-07	4.79E-06
EMP3	-0.213206972	9.26E-07	4.80E-06
SNRNP35	-0.213189448	9.28E-07	4.80E-06
HHIPL1	-0.213052253	9.44E-07	4.88E-06
POPDC3	-0.213048188	9.44E-07	4.88E-06
PANX1	-0.213007129	9.49E-07	4.90E-06
ISG15	-0.212967753	9.53E-07	4.92E-06
ANGPTL2	-0.21291988	9.59E-07	4.95E-06
TBX2	-0.212910407	9.60E-07	4.95E-06
OLFML3	-0.212897046	9.61E-07	4.96E-06
TRIM3	-0.212830778	9.69E-07	5.00E-06
C15orf59	-0.212737803	9.80E-07	5.05E-06
GALNT13	-0.212734819	9.80E-07	5.05E-06
LRRC32	-0.212715984	9.82E-07	5.05E-06
SYTL1	-0.212707472	9.83E-07	5.06E-06
LUM	-0.212575977	9.99E-07	5.13E-06
LCE1F	-0.212535514	1.00E-06	5.16E-06
UNC13D	-0.212523623	1.01E-06	5.16E-06
SGCD	-0.212522608	1.01E-06	5.16E-06
HES5	-0.212329697	1.03E-06	5.27E-06
CLLU1OS	-0.212317405	1.03E-06	5.28E-06
C5orf55	-0.212307171	1.03E-06	5.29E-06
CNRIP1	-0.212222866	1.04E-06	5.34E-06
CACNA1A	-0.212110862	1.06E-06	5.40E-06
HSPB7	-0.212076989	1.06E-06	5.42E-06
ANPEP	-0.212016206	1.07E-06	5.46E-06
MCEE	-0.211991683	1.07E-06	5.47E-06
CD207	-0.211950873	1.08E-06	5.50E-06
TM7SF2	-0.211919076	1.08E-06	5.52E-06
AHNAK2	-0.211909796	1.08E-06	5.52E-06
ACTC1	-0.211897819	1.08E-06	5.53E-06
MCHR1	-0.211822159	1.09E-06	5.57E-06
KLK14	-0.211791052	1.10E-06	5.59E-06
CORO6	-0.211602663	1.12E-06	5.71E-06
NUTF2	-0.211520072	1.13E-06	5.77E-06
SSU72	-0.211495635	1.14E-06	5.78E-06
RIMS3	-0.211493005	1.14E-06	5.78E-06
PXDNL	-0.211488717	1.14E-06	5.78E-06
NEB	-0.211481948	1.14E-06	5.79E-06
FAM20C	-0.211466297	1.14E-06	5.80E-06
TCEB1	-0.211443252	1.14E-06	5.81E-06
ARC	-0.21137843	1.15E-06	5.85E-06
KLHL30	-0.21125627	1.17E-06	5.93E-06
PRSS27	-0.211252586	1.17E-06	5.93E-06
TNNC1	-0.211223113	1.17E-06	5.95E-06
CARD6	-0.211154715	1.18E-06	5.99E-06
EEF1DP3	-0.211127967	1.19E-06	6.01E-06
NUDT14	-0.211015168	1.20E-06	6.09E-06
UFC1	-0.210945114	1.21E-06	6.13E-06
WISP3	-0.210944216	1.21E-06	6.13E-06
C17orf107	-0.210861037	1.23E-06	6.19E-06
THNSL2	-0.210797247	1.23E-06	6.23E-06
COMMD9	-0.210794154	1.24E-06	6.23E-06
C22orf36	-0.210790893	1.24E-06	6.23E-06
CIB2	-0.210678927	1.25E-06	6.31E-06
PHLDA2	-0.210612972	1.26E-06	6.36E-06
CDC42	-0.210583671	1.27E-06	6.38E-06
F10	-0.210553509	1.27E-06	6.40E-06
TMSL3	-0.210532391	1.27E-06	6.41E-06
PSG4	-0.210480764	1.28E-06	6.45E-06
FAM178B	-0.210480102	1.28E-06	6.45E-06
BOC	-0.21041657	1.29E-06	6.49E-06
ZDHHC8	-0.21037194	1.30E-06	6.52E-06
GSDMC	-0.210354734	1.30E-06	6.54E-06
YPEL2	-0.210332468	1.30E-06	6.55E-06
PPP4C	-0.210332132	1.30E-06	6.55E-06
PGF	-0.210328978	1.31E-06	6.55E-06
DES	-0.210314616	1.31E-06	6.56E-06
CAMK2D	-0.210244961	1.32E-06	6.61E-06
TMEM187	-0.210069869	1.35E-06	6.74E-06
CCL27	-0.210065231	1.35E-06	6.74E-06
C1S	-0.210010935	1.36E-06	6.78E-06
LRRC39	-0.209993413	1.36E-06	6.79E-06
RHOBTB1	-0.209946653	1.37E-06	6.83E-06
HMOX1	-0.209882952	1.38E-06	6.88E-06
FAM19A5	-0.209752111	1.40E-06	6.98E-06
CCDC153	-0.209742843	1.40E-06	6.99E-06
PITPNA	-0.209737994	1.40E-06	6.99E-06
CTSL1	-0.20973628	1.40E-06	6.99E-06
ENG	-0.209701584	1.41E-06	7.01E-06
MRPL20	-0.209682072	1.41E-06	7.03E-06
FAM63A	-0.209628385	1.42E-06	7.07E-06
AKR1B10	-0.209622431	1.42E-06	7.07E-06
ME3	-0.209445531	1.45E-06	7.21E-06
PPP1R9B	-0.209405684	1.46E-06	7.24E-06
ACTA2	-0.209348801	1.47E-06	7.29E-06
HBXIP	-0.209339039	1.47E-06	7.30E-06
RRAD	-0.209285617	1.48E-06	7.34E-06
EPS8L2	-0.209221465	1.49E-06	7.39E-06
SMTNL2	-0.209130717	1.50E-06	7.46E-06
XKRX	-0.20911644	1.51E-06	7.47E-06
IL1F8	-0.209103674	1.51E-06	7.48E-06
NKIRAS2	-0.209001147	1.53E-06	7.57E-06
RAET1G	-0.2089303	1.54E-06	7.63E-06
SPG7	-0.208920921	1.54E-06	7.63E-06
ADRA1D	-0.208913753	1.54E-06	7.64E-06
PPBP	-0.208826005	1.56E-06	7.71E-06
SFRP2	-0.208772841	1.57E-06	7.75E-06
CUTA	-0.208766731	1.57E-06	7.76E-06
RPS25	-0.208738955	1.57E-06	7.78E-06
TLN2	-0.208636713	1.59E-06	7.86E-06
CHMP1B	-0.208561078	1.61E-06	7.93E-06
DRD4	-0.20842472	1.63E-06	8.04E-06
TXNRD2	-0.208366438	1.65E-06	8.09E-06
RFTN1	-0.208034184	1.71E-06	8.39E-06
ANKRD19	-0.207998737	1.72E-06	8.42E-06
POLR3H	-0.20798545	1.72E-06	8.43E-06
TNIP2	-0.207941425	1.73E-06	8.47E-06
DIRC3	-0.207925497	1.73E-06	8.48E-06
MRPL53	-0.207803573	1.76E-06	8.60E-06
SLC25A18	-0.207729122	1.77E-06	8.67E-06
ABCB8	-0.207695936	1.78E-06	8.70E-06
MCTS1	-0.207664044	1.79E-06	8.73E-06
MED11	-0.207626369	1.79E-06	8.76E-06
DOK5	-0.207619508	1.80E-06	8.77E-06
ACOT11	-0.207548206	1.81E-06	8.83E-06
TTYH3	-0.207485449	1.82E-06	8.89E-06
LOC400940	-0.207469235	1.83E-06	8.91E-06
MYOG	-0.207448588	1.83E-06	8.93E-06
CCRN4L	-0.207438573	1.83E-06	8.93E-06
AGTR1	-0.207400009	1.84E-06	8.96E-06
LPIN3	-0.207390072	1.84E-06	8.97E-06
KDELR2	-0.207383694	1.85E-06	8.98E-06
C9orf16	-0.207305753	1.86E-06	9.06E-06
TRNP1	-0.207295992	1.86E-06	9.06E-06
RPS27L	-0.207257742	1.87E-06	9.10E-06
NGRN	-0.207236219	1.88E-06	9.12E-06
RAPGEF3	-0.207193977	1.89E-06	9.16E-06
LOC375190	-0.207164026	1.89E-06	9.18E-06
MAP3K10	-0.207163783	1.89E-06	9.18E-06
OR7E91P	-0.207127241	1.90E-06	9.22E-06
ARPC3	-0.207126095	1.90E-06	9.22E-06
GPATCH3	-0.207101524	1.91E-06	9.24E-06
MT1A	-0.207080018	1.91E-06	9.26E-06
CYBASC3	-0.207077547	1.91E-06	9.26E-06
CHIC2	-0.207069456	1.91E-06	9.27E-06
INHBA	-0.20700238	1.93E-06	9.33E-06
C11orf2	-0.206909467	1.95E-06	9.42E-06
ZNF404	-0.206782978	1.98E-06	9.56E-06
SUPT5H	-0.206746964	1.99E-06	9.60E-06
FAM69A	-0.206711678	2.00E-06	9.63E-06
SGCG	-0.206710199	2.00E-06	9.63E-06
EVPL	-0.20668417	2.00E-06	9.66E-06
DSCR8	-0.206519966	2.04E-06	9.84E-06
DHRS4L2	-0.206495612	2.05E-06	9.86E-06
CTHRC1	-0.206459938	2.06E-06	9.90E-06
GADD45G	-0.206344228	2.08E-06	1.00E-05
EMILIN1	-0.206337119	2.08E-06	1.00E-05
ACOT13	-0.20629286	2.10E-06	1.01E-05
C6orf129	-0.206245221	2.11E-06	1.01E-05
VGLL3	-0.206222327	2.11E-06	1.01E-05
GAS6	-0.206101421	2.14E-06	1.03E-05
CNGB1	-0.206101284	2.14E-06	1.03E-05
UCHL3	-0.206095732	2.14E-06	1.03E-05
C19orf6	-0.206092268	2.14E-06	1.03E-05
COMMD7	-0.2060284	2.16E-06	1.04E-05
SMPD2	-0.205980527	2.17E-06	1.04E-05
RHBG	-0.20597979	2.17E-06	1.04E-05
UBE2D4	-0.20593133	2.19E-06	1.05E-05
PGAM2	-0.205846647	2.21E-06	1.06E-05
IVNS1ABP	-0.205839914	2.21E-06	1.06E-05
GLRX	-0.20573413	2.24E-06	1.07E-05
ATMIN	-0.205719677	2.24E-06	1.07E-05
ITGA5	-0.205600135	2.27E-06	1.09E-05
EFNA4	-0.205556564	2.28E-06	1.09E-05
HEPHL1	-0.205429865	2.32E-06	1.11E-05
ASPN	-0.205429055	2.32E-06	1.11E-05
SHANK1	-0.205356655	2.34E-06	1.11E-05
NTM	-0.205354468	2.34E-06	1.11E-05
ENAH	-0.205279644	2.36E-06	1.12E-05
LCN1	-0.205229105	2.37E-06	1.13E-05
FLJ44635	-0.205080433	2.41E-06	1.15E-05
TRMT61A	-0.205045963	2.42E-06	1.15E-05
CYTSB	-0.204955644	2.45E-06	1.16E-05
GPR77	-0.204836751	2.48E-06	1.18E-05
ATP6V0A4	-0.204804112	2.49E-06	1.18E-05
SHD	-0.204688412	2.52E-06	1.20E-05
IL1F9	-0.204638693	2.54E-06	1.20E-05
DOCK3	-0.204616901	2.54E-06	1.21E-05
FBXO10	-0.204586893	2.55E-06	1.21E-05
RCAN2	-0.204476864	2.58E-06	1.22E-05
ANKRD9	-0.204219445	2.66E-06	1.26E-05
PLCD4	-0.204191807	2.67E-06	1.26E-05
APP	-0.204128588	2.69E-06	1.27E-05
ZNF385A	-0.204107137	2.70E-06	1.27E-05
LYPD5	-0.204030049	2.72E-06	1.28E-05
ADCK5	-0.204021665	2.72E-06	1.29E-05
C9orf95	-0.204013425	2.73E-06	1.29E-05
C16orf7	-0.20401121	2.73E-06	1.29E-05
PAF1	-0.203956368	2.74E-06	1.29E-05
STK11IP	-0.203933782	2.75E-06	1.30E-05
RAB25	-0.203882631	2.77E-06	1.30E-05
ZNF385D	-0.203751747	2.81E-06	1.32E-05
CLEC18C	-0.203749743	2.81E-06	1.32E-05
DNALI1	-0.203585719	2.86E-06	1.35E-05
FOSL1	-0.20357564	2.87E-06	1.35E-05
SLC35C2	-0.203435863	2.91E-06	1.37E-05
EIF3G	-0.203420169	2.92E-06	1.37E-05
C19orf56	-0.203330118	2.95E-06	1.38E-05
FAM20A	-0.203315336	2.95E-06	1.39E-05
TMEM54	-0.203293245	2.96E-06	1.39E-05
BGLAP	-0.203268922	2.97E-06	1.39E-05
C5orf62	-0.203256812	2.97E-06	1.39E-05
MIER2	-0.203243233	2.98E-06	1.40E-05
CDHR1	-0.203215531	2.99E-06	1.40E-05
PYGL	-0.203104336	3.03E-06	1.42E-05
HEYL	-0.203073604	3.04E-06	1.42E-05
MYH8	-0.203066483	3.04E-06	1.42E-05
GLRA4	-0.203058393	3.04E-06	1.42E-05
OSTC	-0.203044715	3.05E-06	1.42E-05
TP53AIP1	-0.203037345	3.05E-06	1.43E-05
PPP1R7	-0.203025299	3.05E-06	1.43E-05
TINF2	-0.202947914	3.08E-06	1.44E-05
NDUFB10	-0.202939426	3.08E-06	1.44E-05
LCE5A	-0.202926269	3.09E-06	1.44E-05
MRVI1	-0.202918495	3.09E-06	1.44E-05
C10orf71	-0.20291139	3.09E-06	1.44E-05
PSG7	-0.202846077	3.12E-06	1.45E-05
NCAM1	-0.202813373	3.13E-06	1.46E-05
PHC2	-0.202760707	3.15E-06	1.47E-05
NES	-0.202710815	3.16E-06	1.47E-05
CATSPER1	-0.202710696	3.16E-06	1.47E-05
FKBP10	-0.202690618	3.17E-06	1.48E-05
KBTBD10	-0.202579891	3.21E-06	1.49E-05
RNF208	-0.202544279	3.22E-06	1.50E-05
C20orf200	-0.202524871	3.23E-06	1.50E-05
LOC284688	-0.202438476	3.26E-06	1.52E-05
TTC39A	-0.20237089	3.29E-06	1.53E-05
LMO1	-0.202264695	3.33E-06	1.54E-05
PFN1	-0.202264104	3.33E-06	1.54E-05
APCDD1L	-0.202147775	3.37E-06	1.56E-05
MYADM	-0.202129802	3.38E-06	1.56E-05
BLCAP	-0.202101549	3.39E-06	1.57E-05
ZSCAN4	-0.20209228	3.40E-06	1.57E-05
MIB2	-0.201984559	3.44E-06	1.59E-05
PCDHB15	-0.20192865	3.46E-06	1.60E-05
KCNJ15	-0.201872221	3.48E-06	1.61E-05
BSG	-0.201743424	3.53E-06	1.63E-05
MMADHC	-0.201628402	3.58E-06	1.65E-05
PUSL1	-0.20161837	3.58E-06	1.65E-05
NPEPL1	-0.201551596	3.61E-06	1.66E-05
ELOVL4	-0.201528579	3.62E-06	1.67E-05
TYRP1	-0.201517708	3.62E-06	1.67E-05
DCUN1D5	-0.201432362	3.66E-06	1.69E-05
PSMD8	-0.201367655	3.69E-06	1.70E-05
PLK1S1	-0.20132727	3.70E-06	1.70E-05
CLK3	-0.201221059	3.75E-06	1.72E-05
NADSYN1	-0.201142103	3.78E-06	1.74E-05
CRYGN	-0.201103831	3.80E-06	1.75E-05
UQCRB	-0.201091426	3.80E-06	1.75E-05
PCDHGC5	-0.201021193	3.83E-06	1.76E-05
OPCML	-0.20100601	3.84E-06	1.76E-05
AMPD2	-0.200965753	3.86E-06	1.77E-05
ZNF788	-0.200957026	3.86E-06	1.77E-05
PNP	-0.200933108	3.87E-06	1.78E-05
IDUA	-0.200887915	3.89E-06	1.78E-05
DACT1	-0.200877106	3.90E-06	1.79E-05
ABHD14A	-0.200860387	3.90E-06	1.79E-05
BAALC	-0.200819938	3.92E-06	1.80E-05
CUL7	-0.20080956	3.93E-06	1.80E-05
COQ10B	-0.200803766	3.93E-06	1.80E-05
SH2D5	-0.200782203	3.94E-06	1.80E-05
KBTBD3	-0.200756869	3.95E-06	1.81E-05
AURKAIP1	-0.20070926	3.97E-06	1.82E-05
C9orf150	-0.200695583	3.98E-06	1.82E-05
MAP6	-0.200643289	4.00E-06	1.83E-05
CD24	-0.200619051	4.01E-06	1.83E-05
OS9	-0.200597011	4.02E-06	1.84E-05
CRLS1	-0.200511206	4.06E-06	1.85E-05
ITIH4	-0.200476723	4.08E-06	1.86E-05
MAP1A	-0.200464352	4.08E-06	1.86E-05
TRPC4	-0.200312982	4.15E-06	1.89E-05
PSG1	-0.200312259	4.15E-06	1.89E-05
GFOD1	-0.200283602	4.17E-06	1.90E-05
NAPRT1	-0.200267114	4.17E-06	1.90E-05
TGFB3	-0.200228078	4.19E-06	1.91E-05
DLX5	-0.200206191	4.20E-06	1.91E-05
MMP14	-0.200178902	4.22E-06	1.92E-05
FAM134B	-0.200127401	4.24E-06	1.93E-05
MUSTN1	-0.200111621	4.25E-06	1.93E-05
SSR4	-0.200070161	4.27E-06	1.94E-05
SPOCK1	-0.200049913	4.28E-06	1.94E-05
ACOT9	-0.199985923	4.31E-06	1.96E-05
PSORS1C2	-0.19990715	4.35E-06	1.97E-05
SPINK7	-0.199859256	4.37E-06	1.98E-05
CARHSP1	-0.19976495	4.42E-06	2.00E-05
GET4	-0.19973627	4.43E-06	2.01E-05
IL22RA1	-0.199570033	4.51E-06	2.04E-05
IGFBP7	-0.199472105	4.56E-06	2.07E-05
ROBLD3	-0.199446122	4.58E-06	2.07E-05
TUBG2	-0.199442085	4.58E-06	2.07E-05
MUC12	-0.199340764	4.63E-06	2.09E-05
FEZ1	-0.199237392	4.69E-06	2.12E-05
ITLN2	-0.199075579	4.77E-06	2.15E-05
DKFZp566F0947	-0.199064269	4.78E-06	2.15E-05
C4orf26	-0.199003196	4.81E-06	2.17E-05
CAPG	-0.19879819	4.92E-06	2.22E-05
C1R	-0.198779159	4.93E-06	2.22E-05
COL12A1	-0.198776406	4.93E-06	2.22E-05
MARK3	-0.198720783	4.97E-06	2.23E-05
SST	-0.198657304	5.00E-06	2.25E-05
CXorf40B	-0.198632273	5.01E-06	2.25E-05
ADAMTSL2	-0.198623555	5.02E-06	2.26E-05
MAMDC2	-0.198565735	5.05E-06	2.27E-05
MGC72080	-0.19849044	5.09E-06	2.28E-05
CGB7	-0.1984716	5.11E-06	2.29E-05
AIG1	-0.198448796	5.12E-06	2.29E-05
DGCR6	-0.198376723	5.16E-06	2.31E-05
CA6	-0.198330542	5.19E-06	2.32E-05
FAM98A	-0.198092374	5.33E-06	2.38E-05
TMEM8C	-0.198069724	5.34E-06	2.39E-05
MYF5	-0.198021782	5.37E-06	2.40E-05
CLEC1B	-0.197993361	5.39E-06	2.40E-05
LOC541471	-0.197959592	5.41E-06	2.41E-05
SNHG9	-0.197889251	5.45E-06	2.43E-05
NOVA2	-0.197875673	5.46E-06	2.43E-05
DUSP10	-0.197790824	5.51E-06	2.46E-05
ZNF419	-0.197771105	5.52E-06	2.46E-05
CLDN17	-0.197722871	5.55E-06	2.47E-05
PARVB	-0.19765109	5.59E-06	2.49E-05
SLC45A2	-0.197629128	5.61E-06	2.50E-05
C16orf58	-0.197617234	5.62E-06	2.50E-05
RAB32	-0.197568695	5.65E-06	2.51E-05
TBC1D3B	-0.197535863	5.67E-06	2.52E-05
SOD3	-0.197464993	5.71E-06	2.54E-05
SNAI1	-0.197460671	5.71E-06	2.54E-05
CTSL2	-0.197328388	5.80E-06	2.57E-05
TPST1	-0.197310384	5.81E-06	2.58E-05
LGMN	-0.197304129	5.81E-06	2.58E-05
REP15	-0.197259954	5.84E-06	2.59E-05
C6orf106	-0.197247482	5.85E-06	2.60E-05
LY6D	-0.197196732	5.88E-06	2.61E-05
LOC554202	-0.197168611	5.90E-06	2.62E-05
PTGS1	-0.196989346	6.02E-06	2.67E-05
ASGR1	-0.196866289	6.10E-06	2.70E-05
TP53I13	-0.196832517	6.13E-06	2.71E-05
TMSB10	-0.196798231	6.15E-06	2.72E-05
RPL36AL	-0.196763342	6.17E-06	2.73E-05
ZNF563	-0.196736864	6.19E-06	2.74E-05
C1orf116	-0.196585289	6.30E-06	2.78E-05
REEP5	-0.196576055	6.30E-06	2.78E-05
MT2A	-0.196569249	6.31E-06	2.78E-05
FLRT2	-0.196568809	6.31E-06	2.78E-05
ASB5	-0.196563141	6.31E-06	2.78E-05
LOC100134229	-0.196540718	6.33E-06	2.79E-05
C19orf66	-0.196470932	6.38E-06	2.81E-05
FTSJ1	-0.196429562	6.41E-06	2.82E-05
GTF2A1L	-0.196348969	6.46E-06	2.84E-05
GJC2	-0.196308728	6.49E-06	2.86E-05
MOV10L1	-0.196299867	6.50E-06	2.86E-05
AQP7	-0.196283794	6.51E-06	2.86E-05
SEC13	-0.196268078	6.52E-06	2.87E-05
NUCB1	-0.196264895	6.52E-06	2.87E-05
C2orf82	-0.196237824	6.54E-06	2.87E-05
[truncated: 9,544 more rows]
